# Supplementary material for: Selective maternal seeding and environment shape the human gut microbiome
Source: PubMed Central journal article supplement (PMC5880245; doi:10.1101/gr.233940.117), 2018-04

# Ruminococcus champanellensis

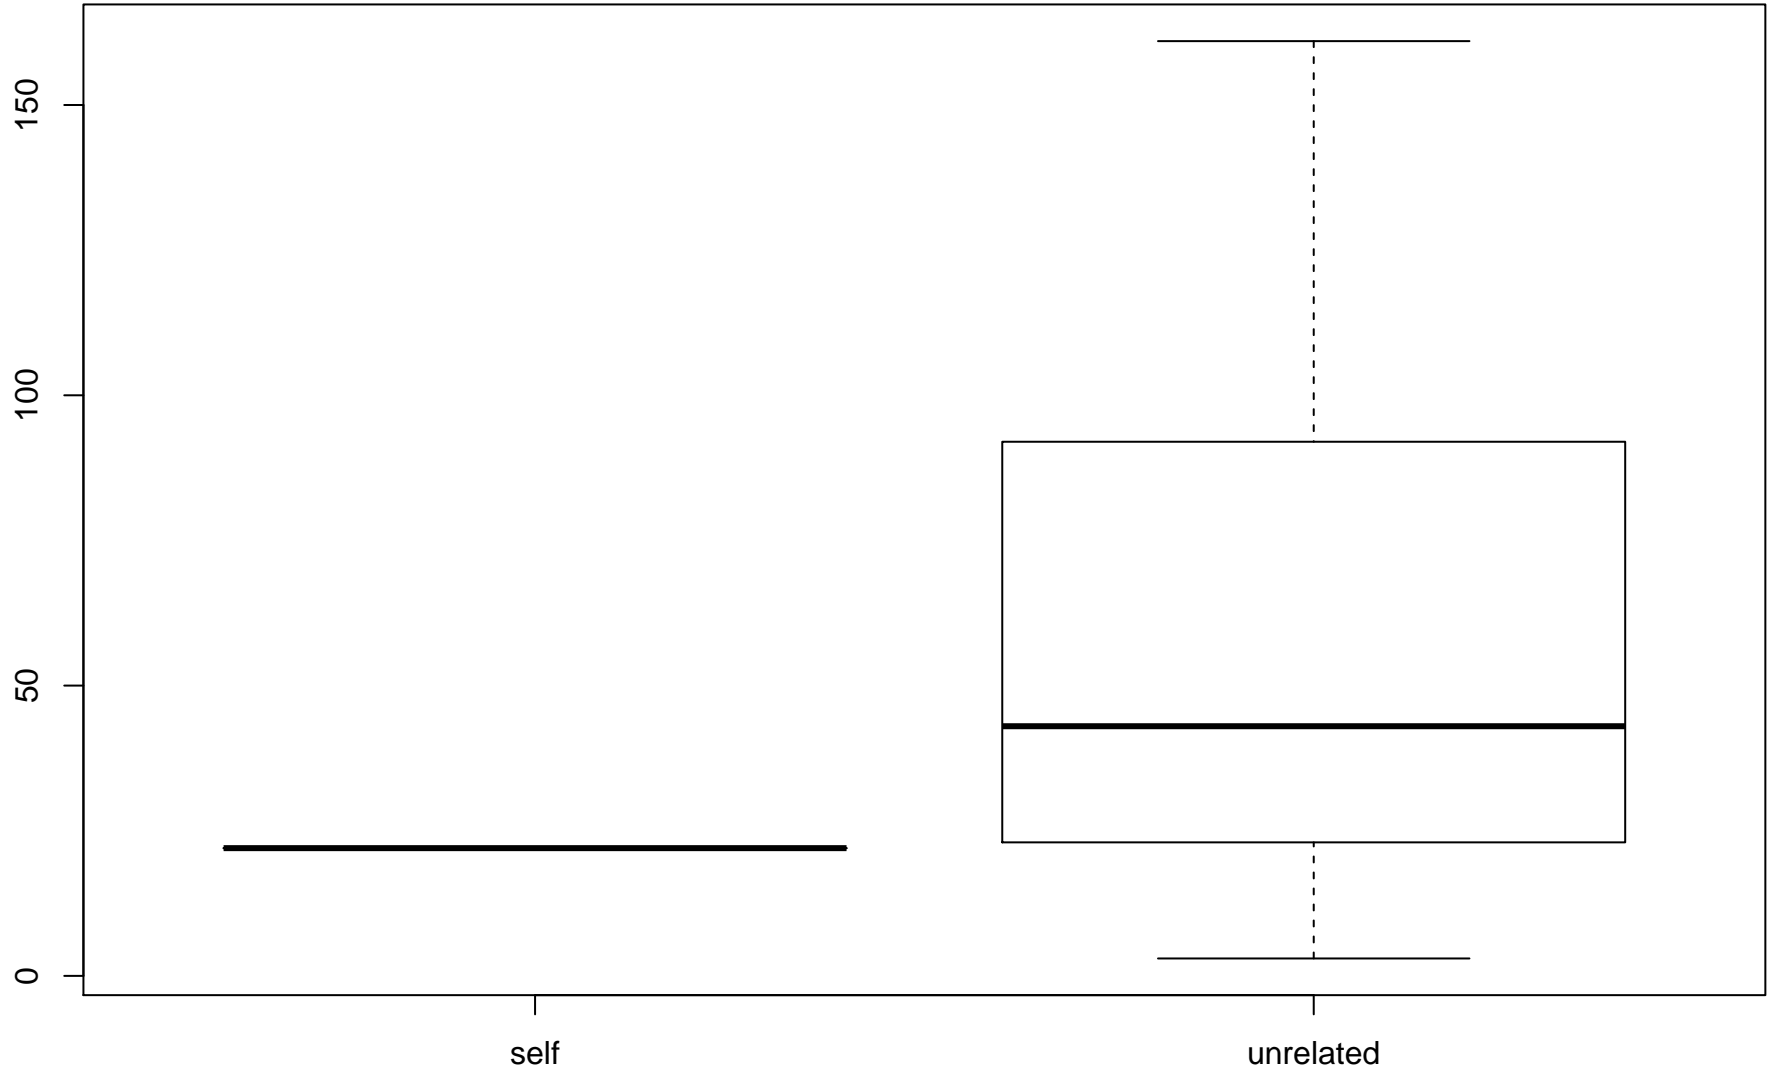

# butyrate-producing bacterium

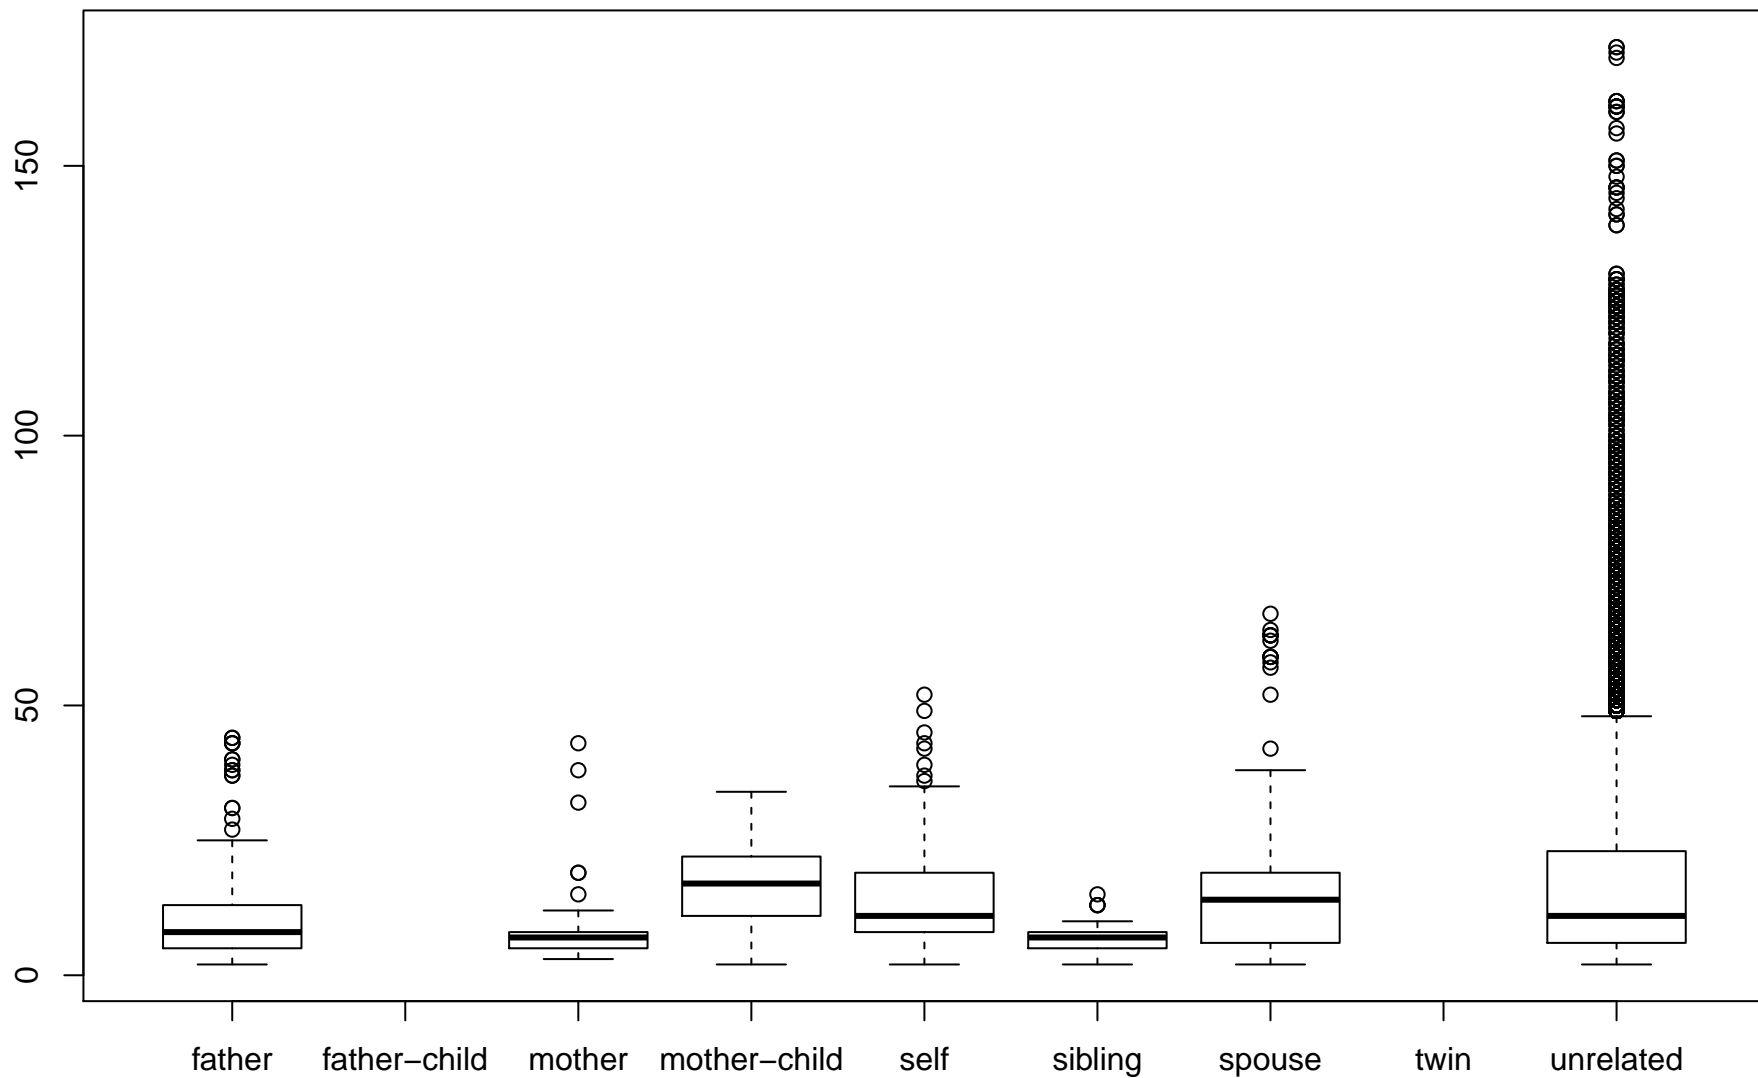

# Peptoclostridium difficile

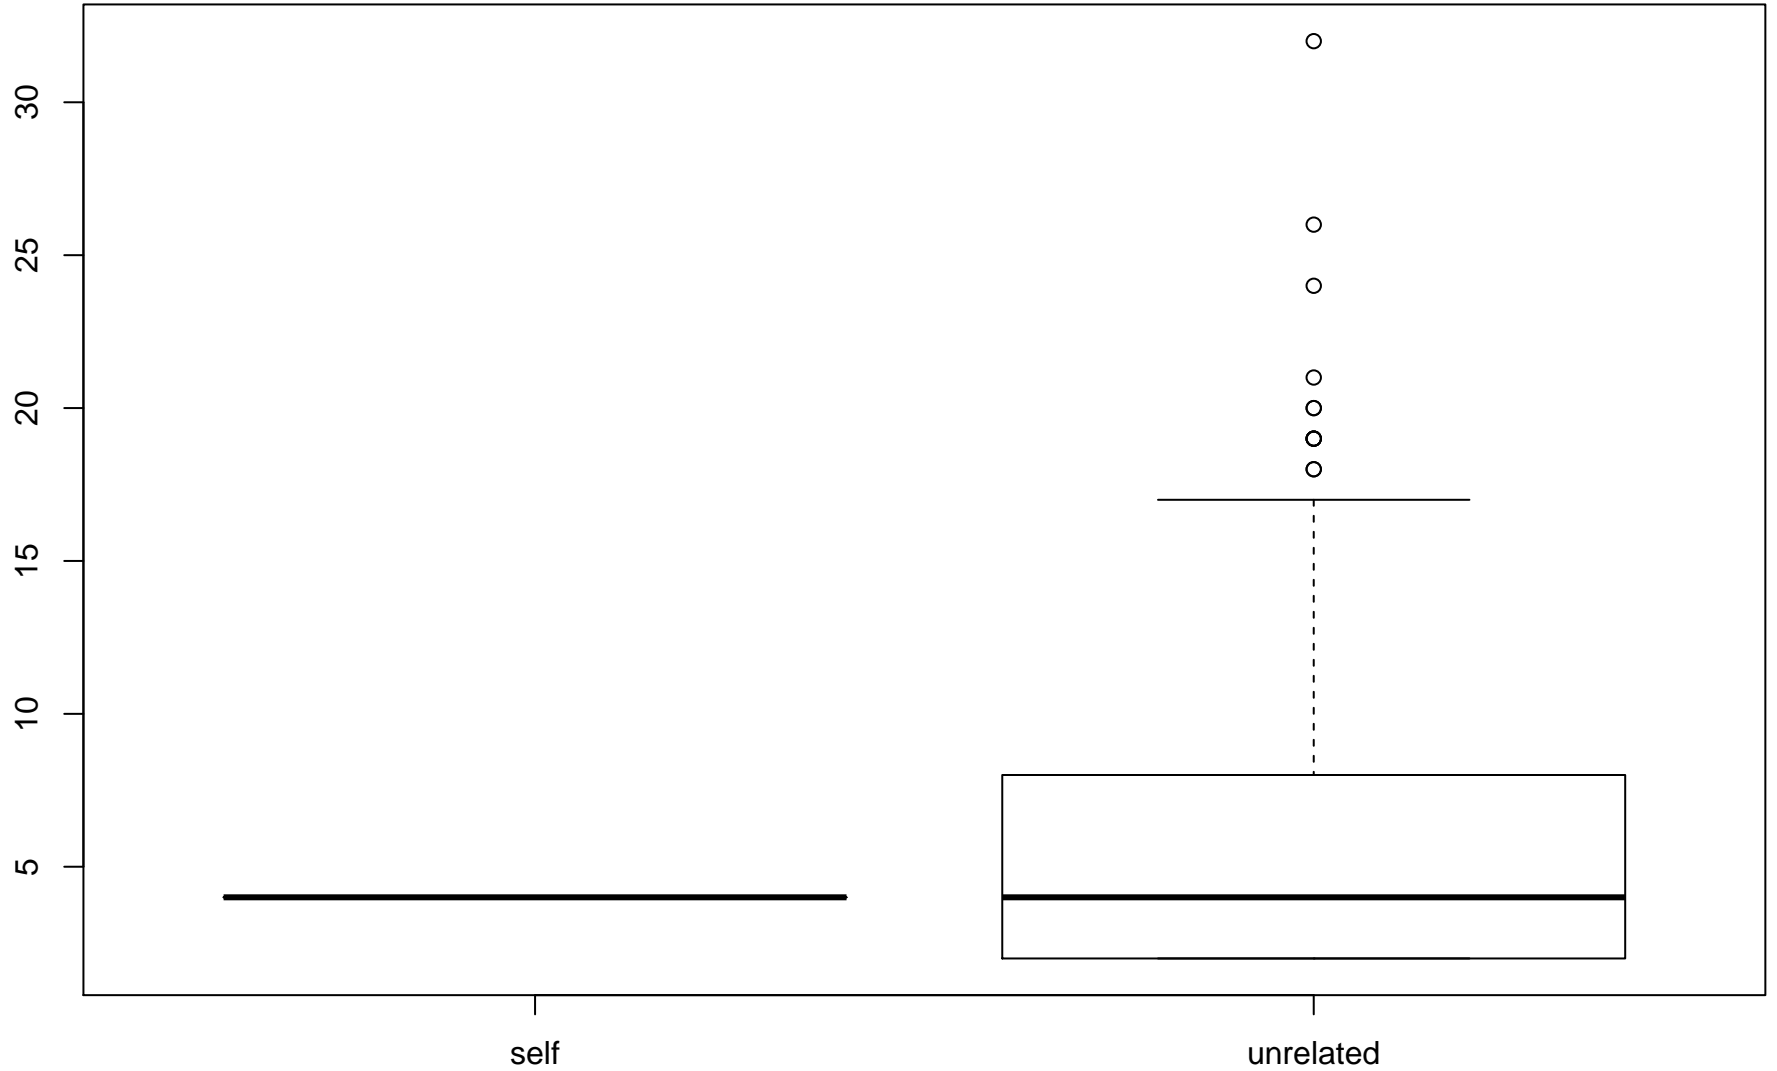

# Bifidobacterium breve

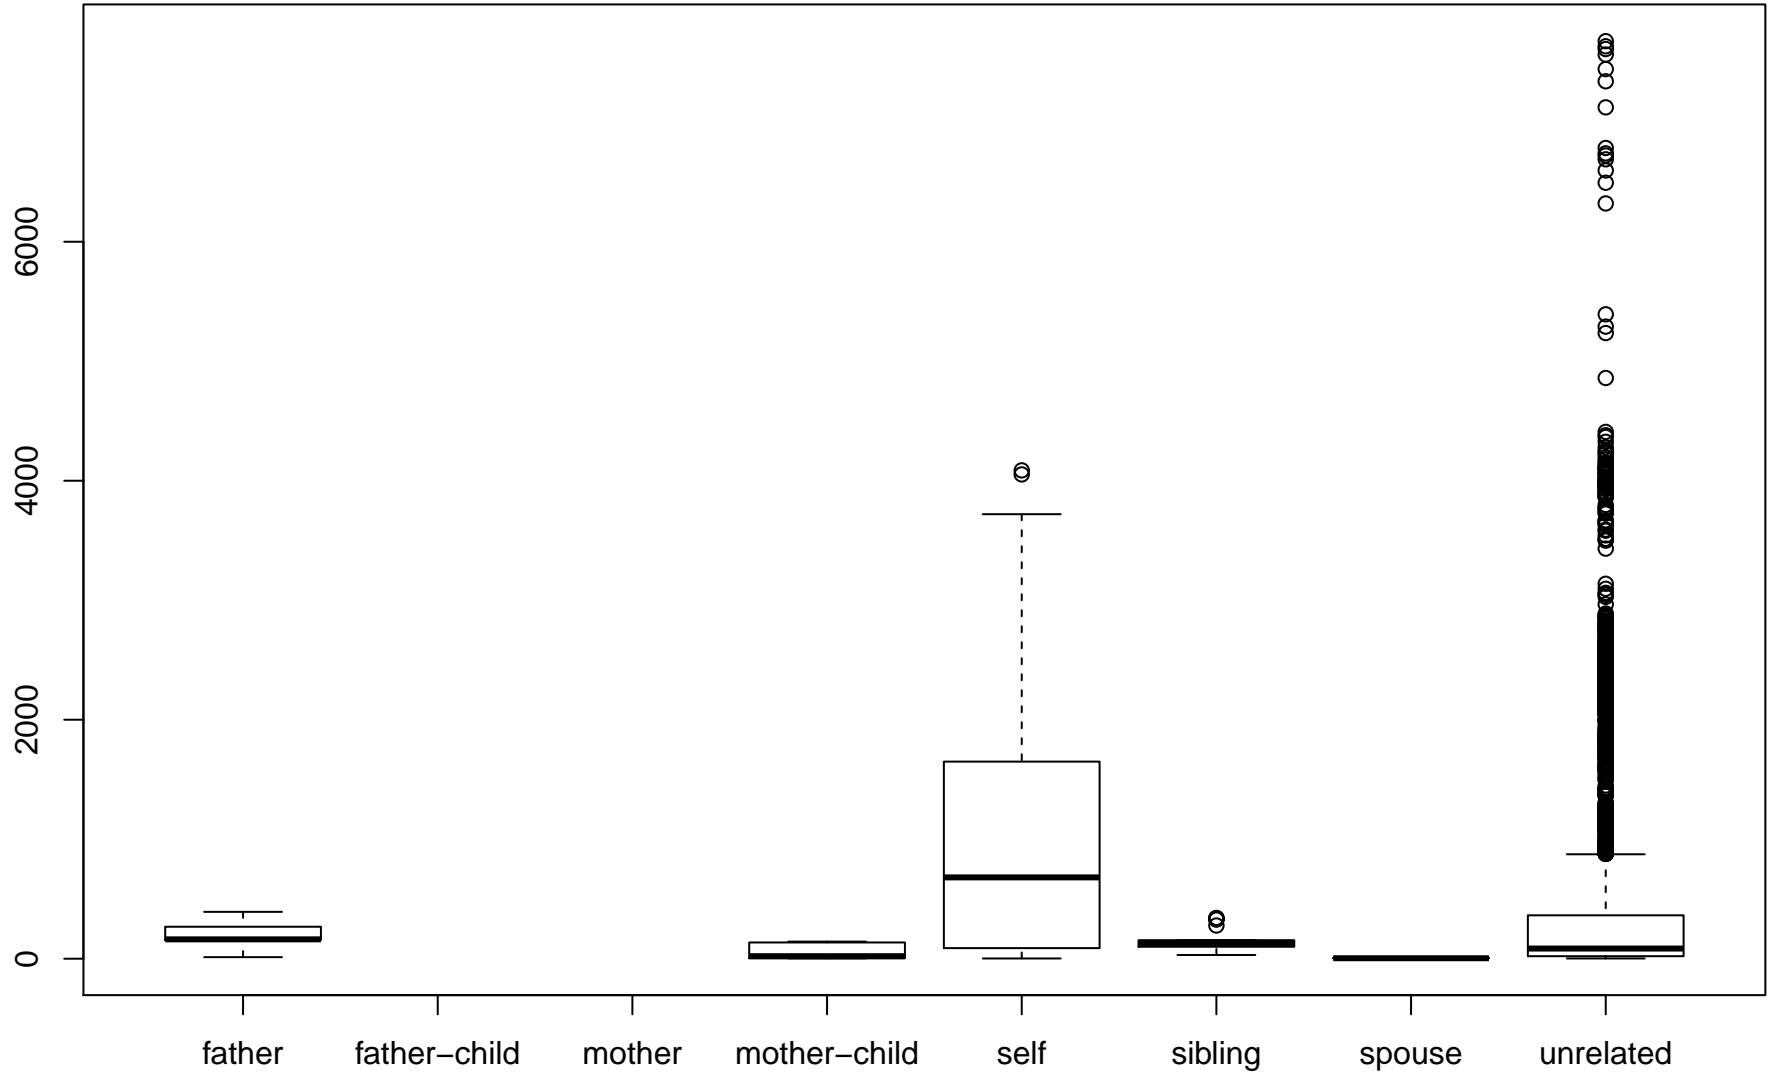

# Victivallis vadensis

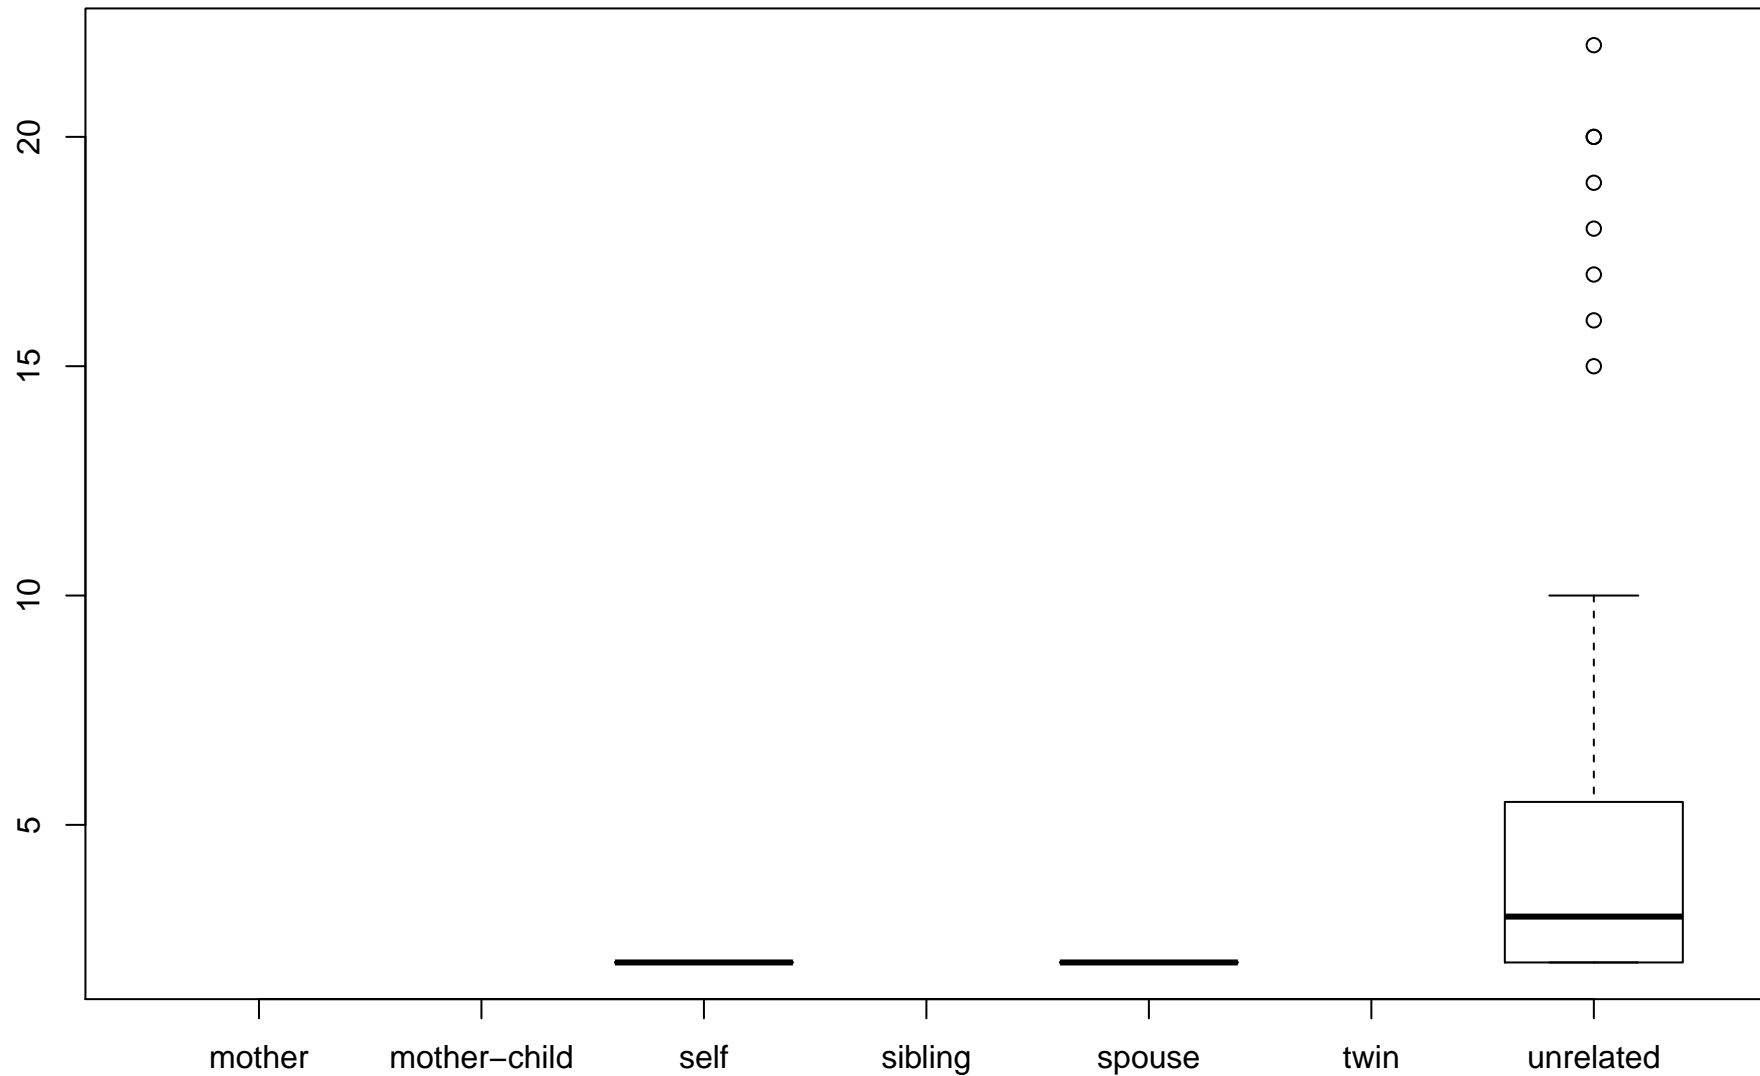

# Bifidobacterium adolescentis

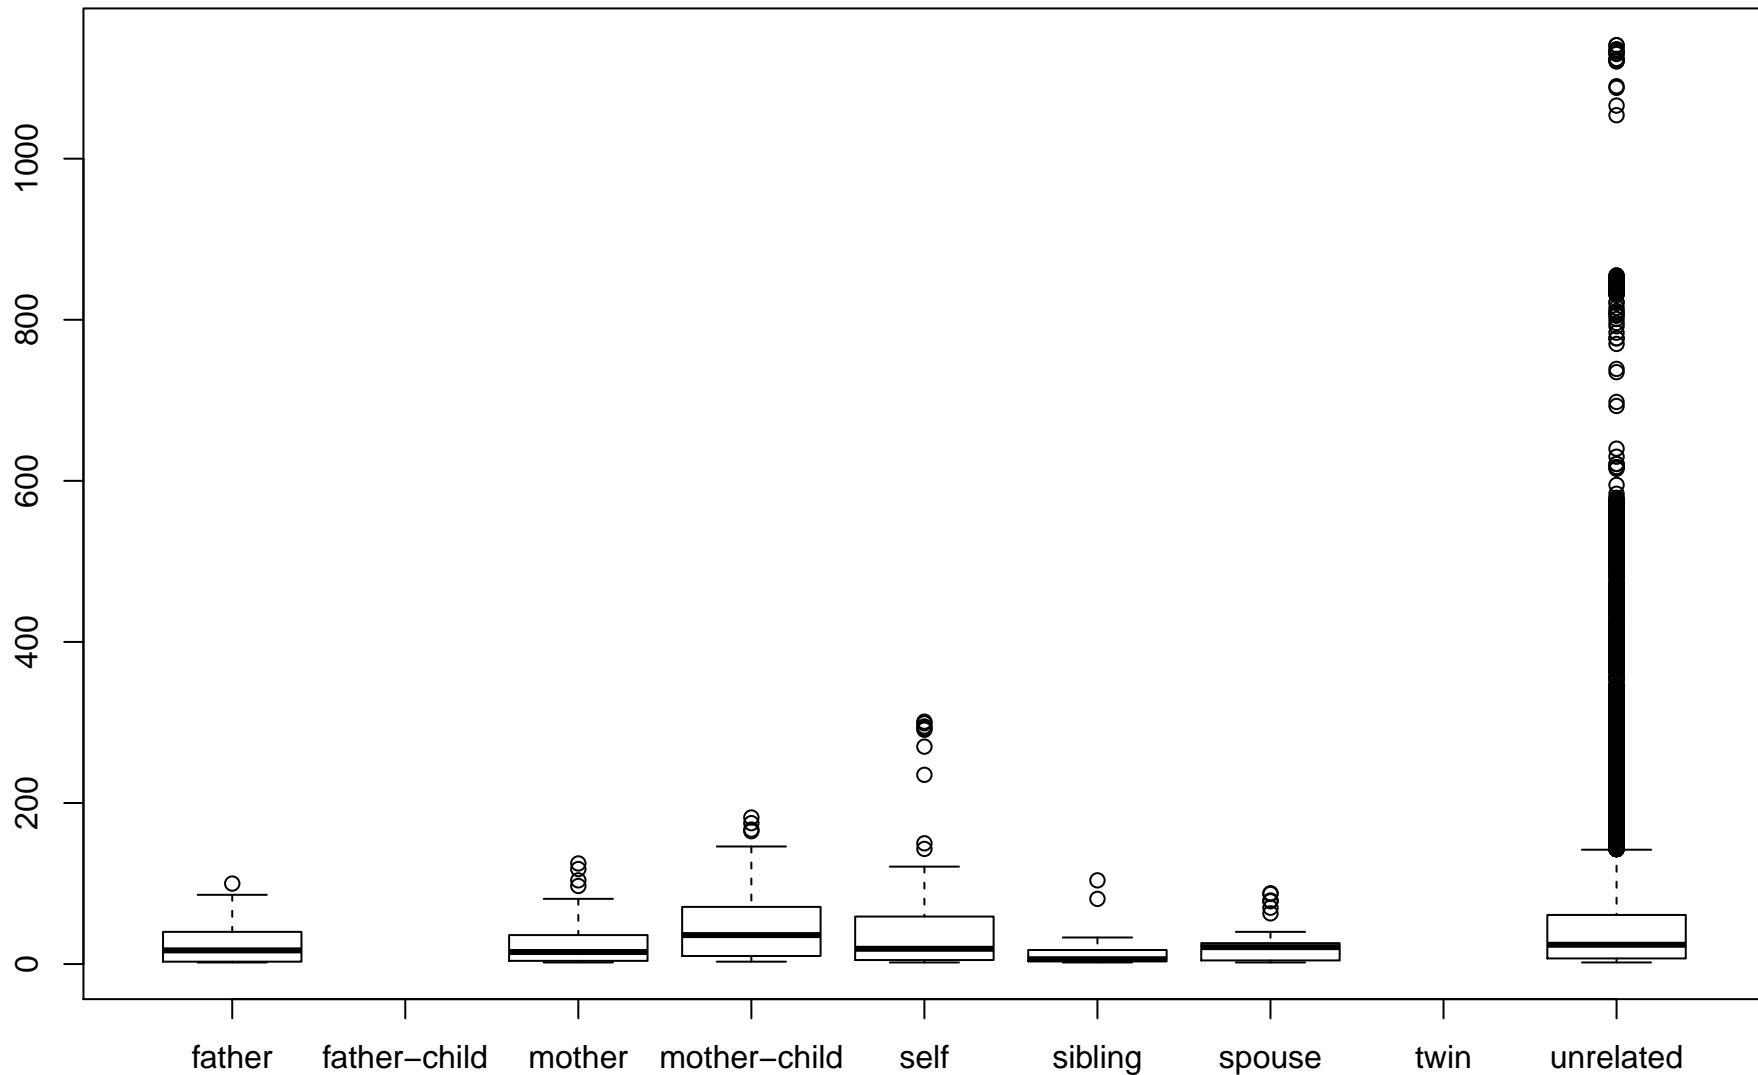

# Bifidobacterium longum

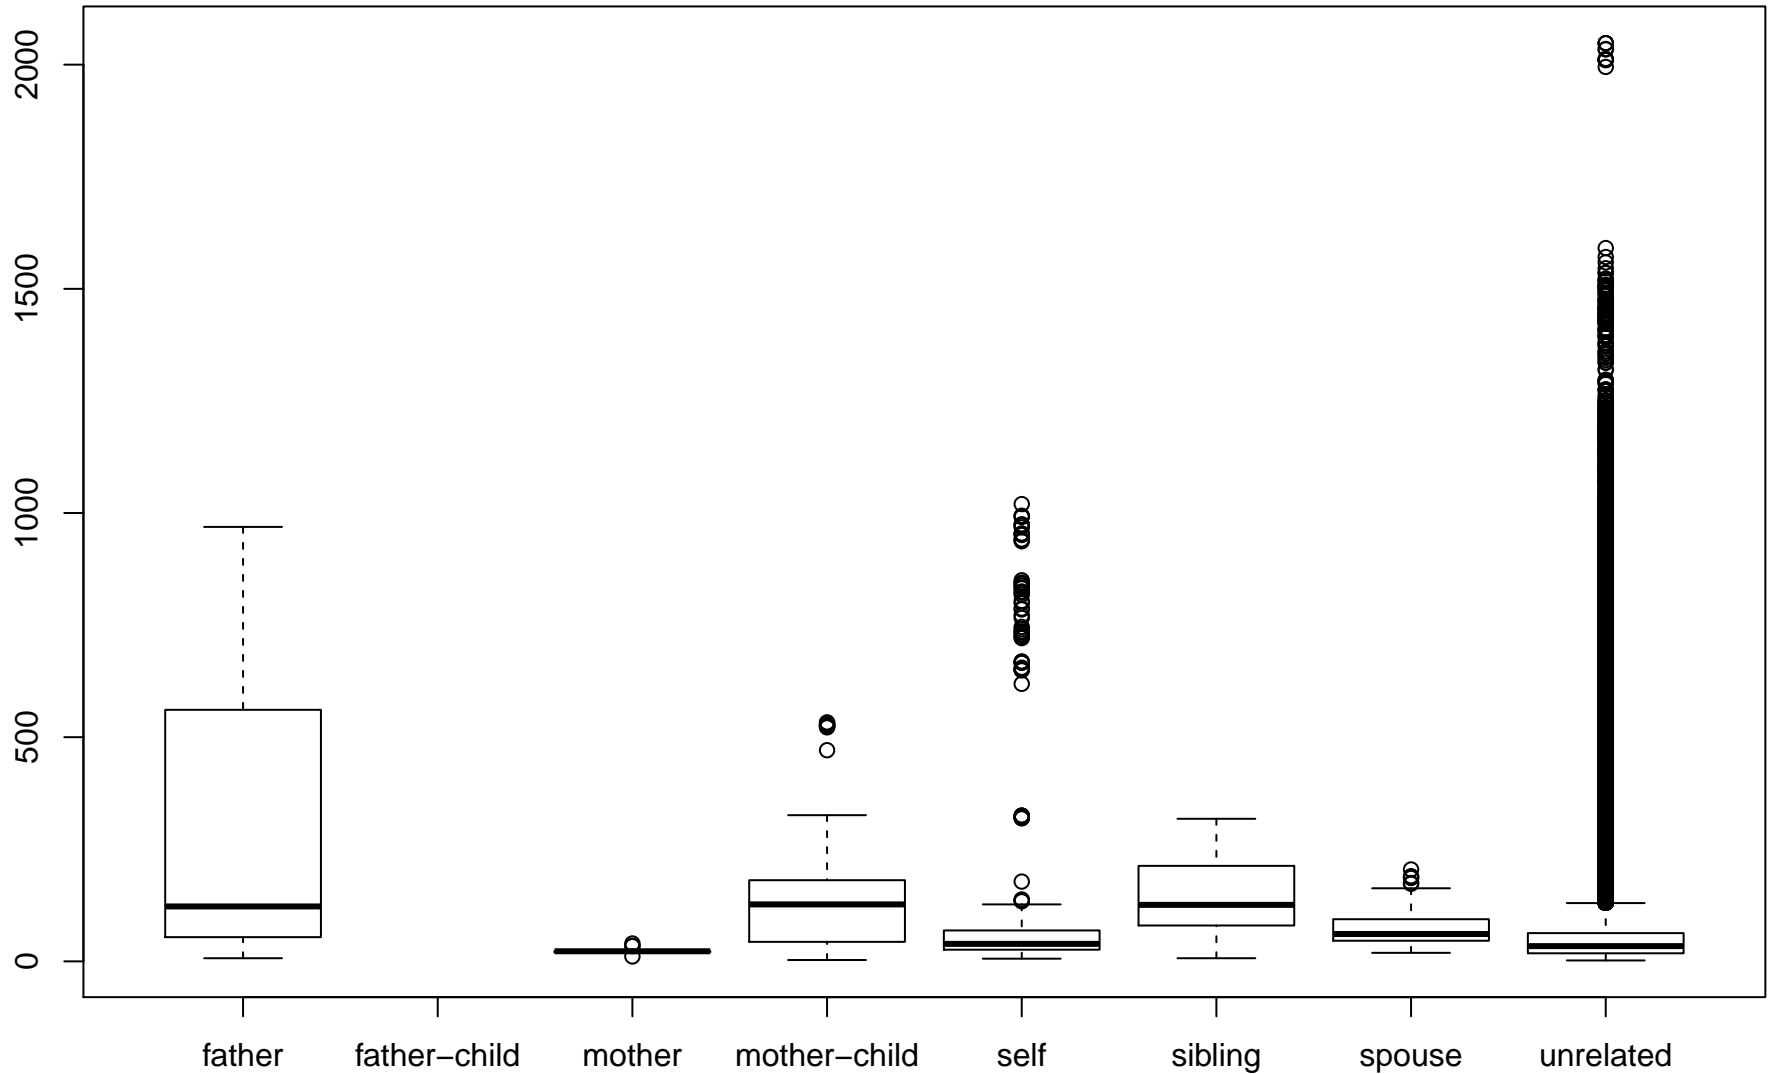

# Bifidobacterium dentium

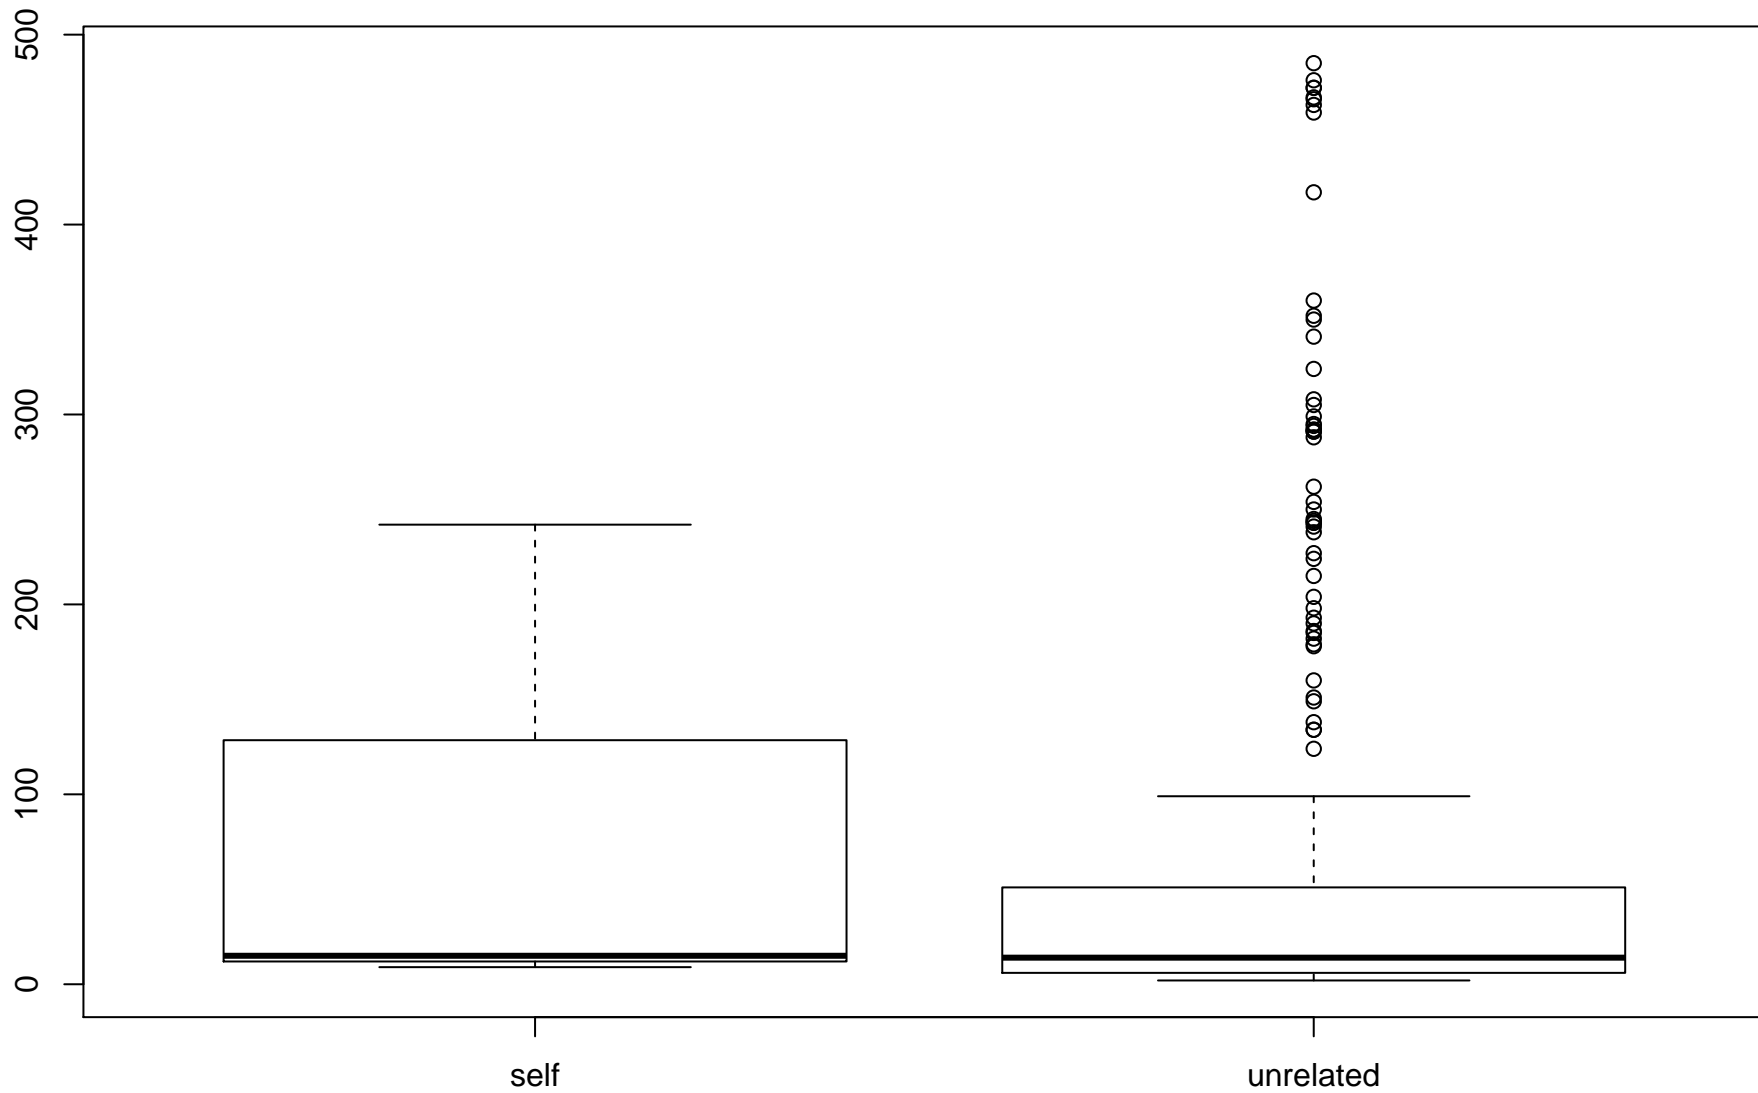



# Blautia obeum

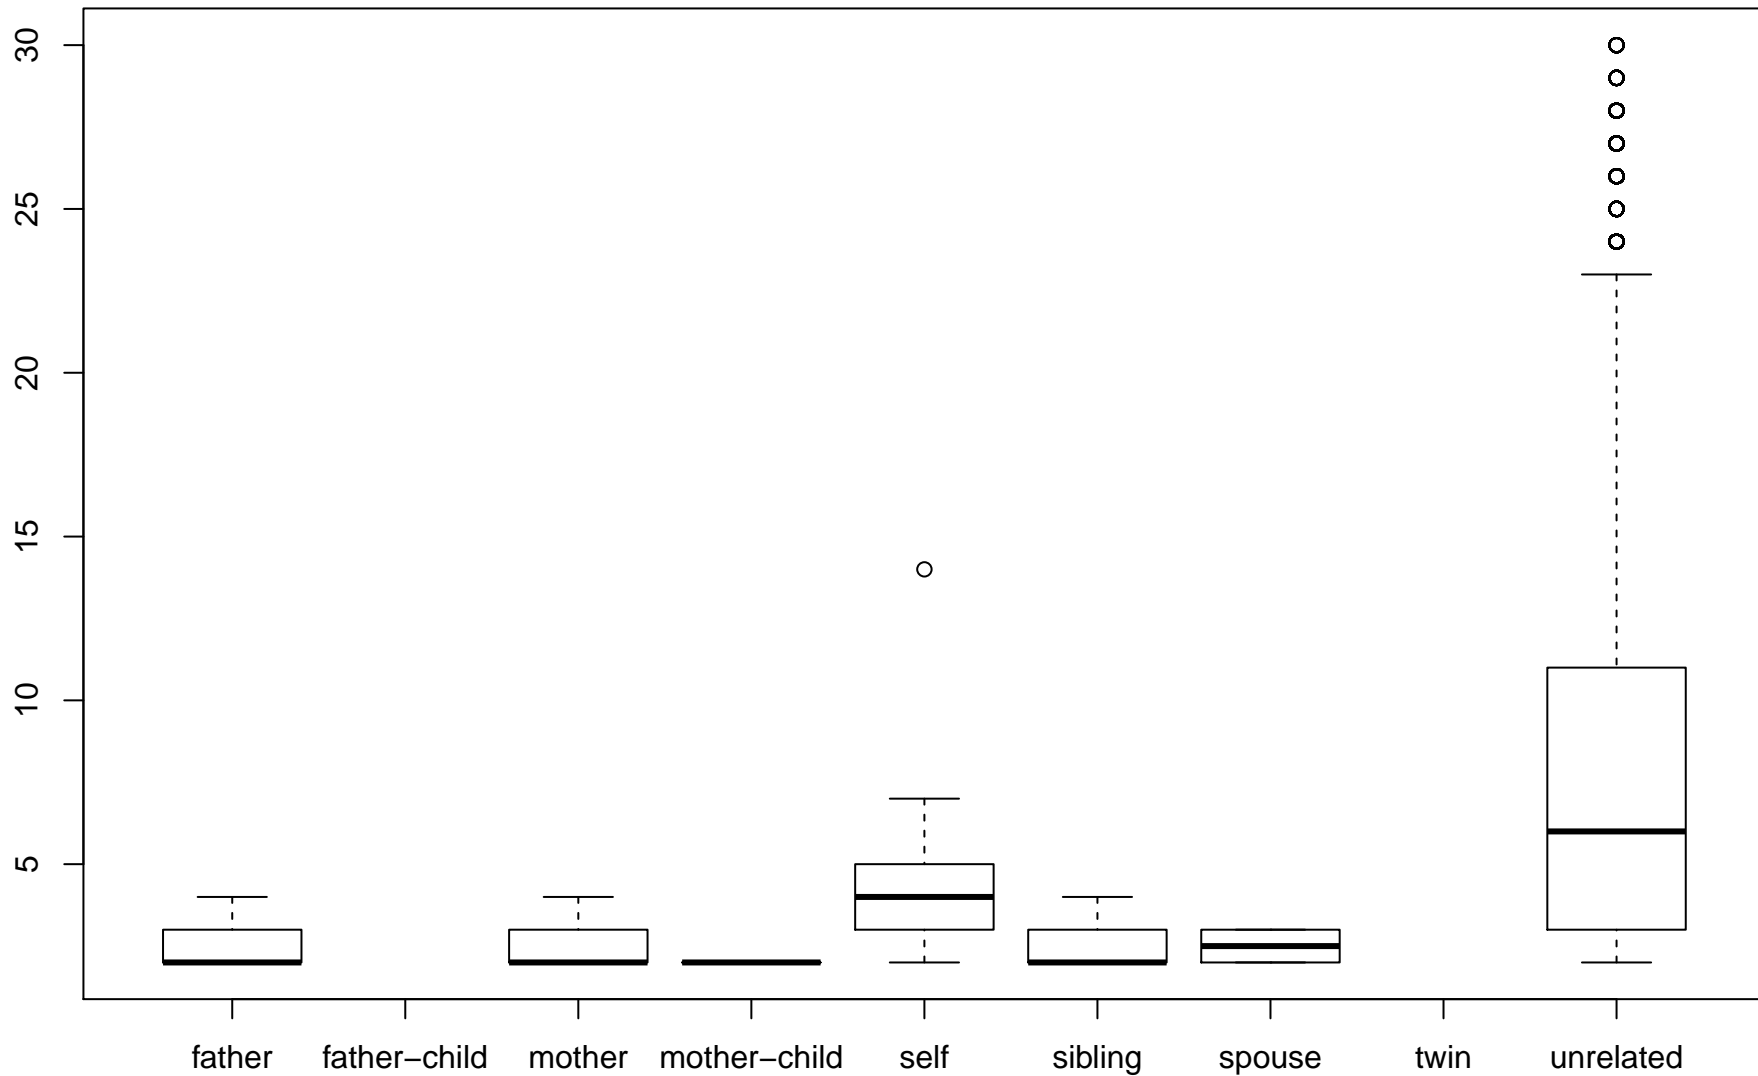

# Ruminococcus torques

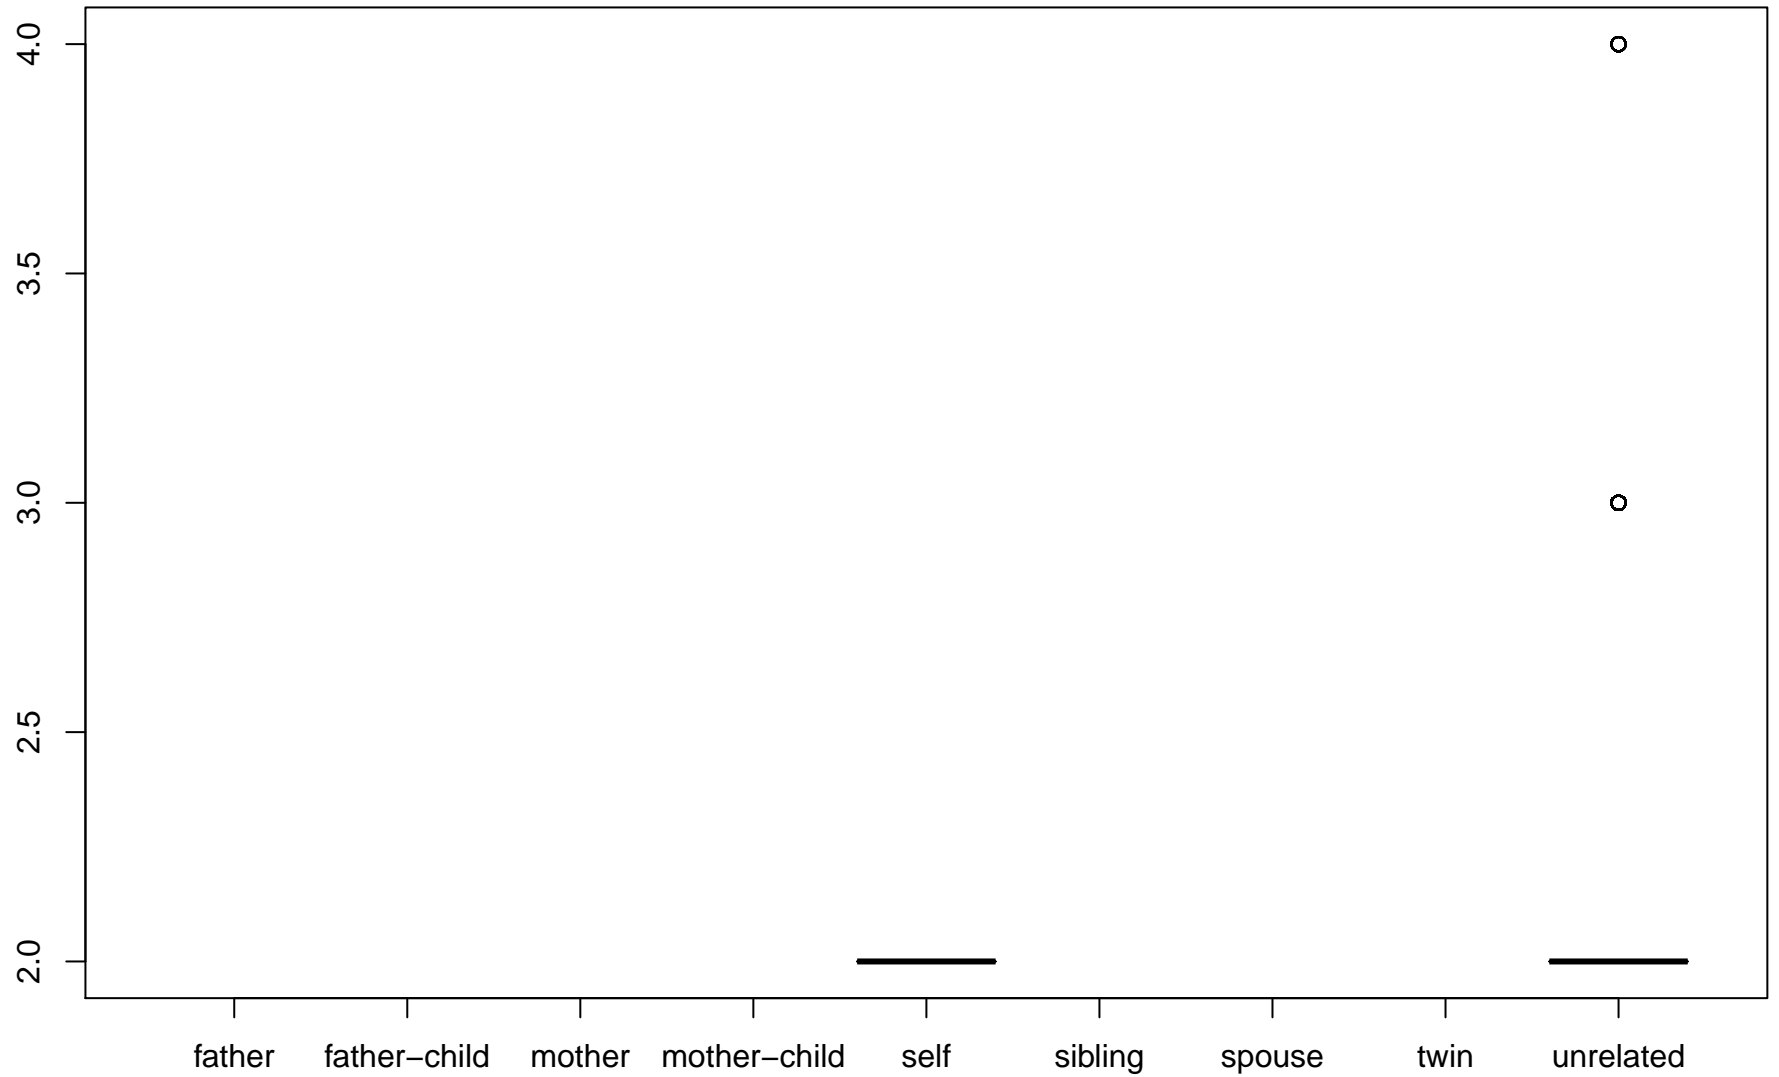

# Dorea formicigenerans

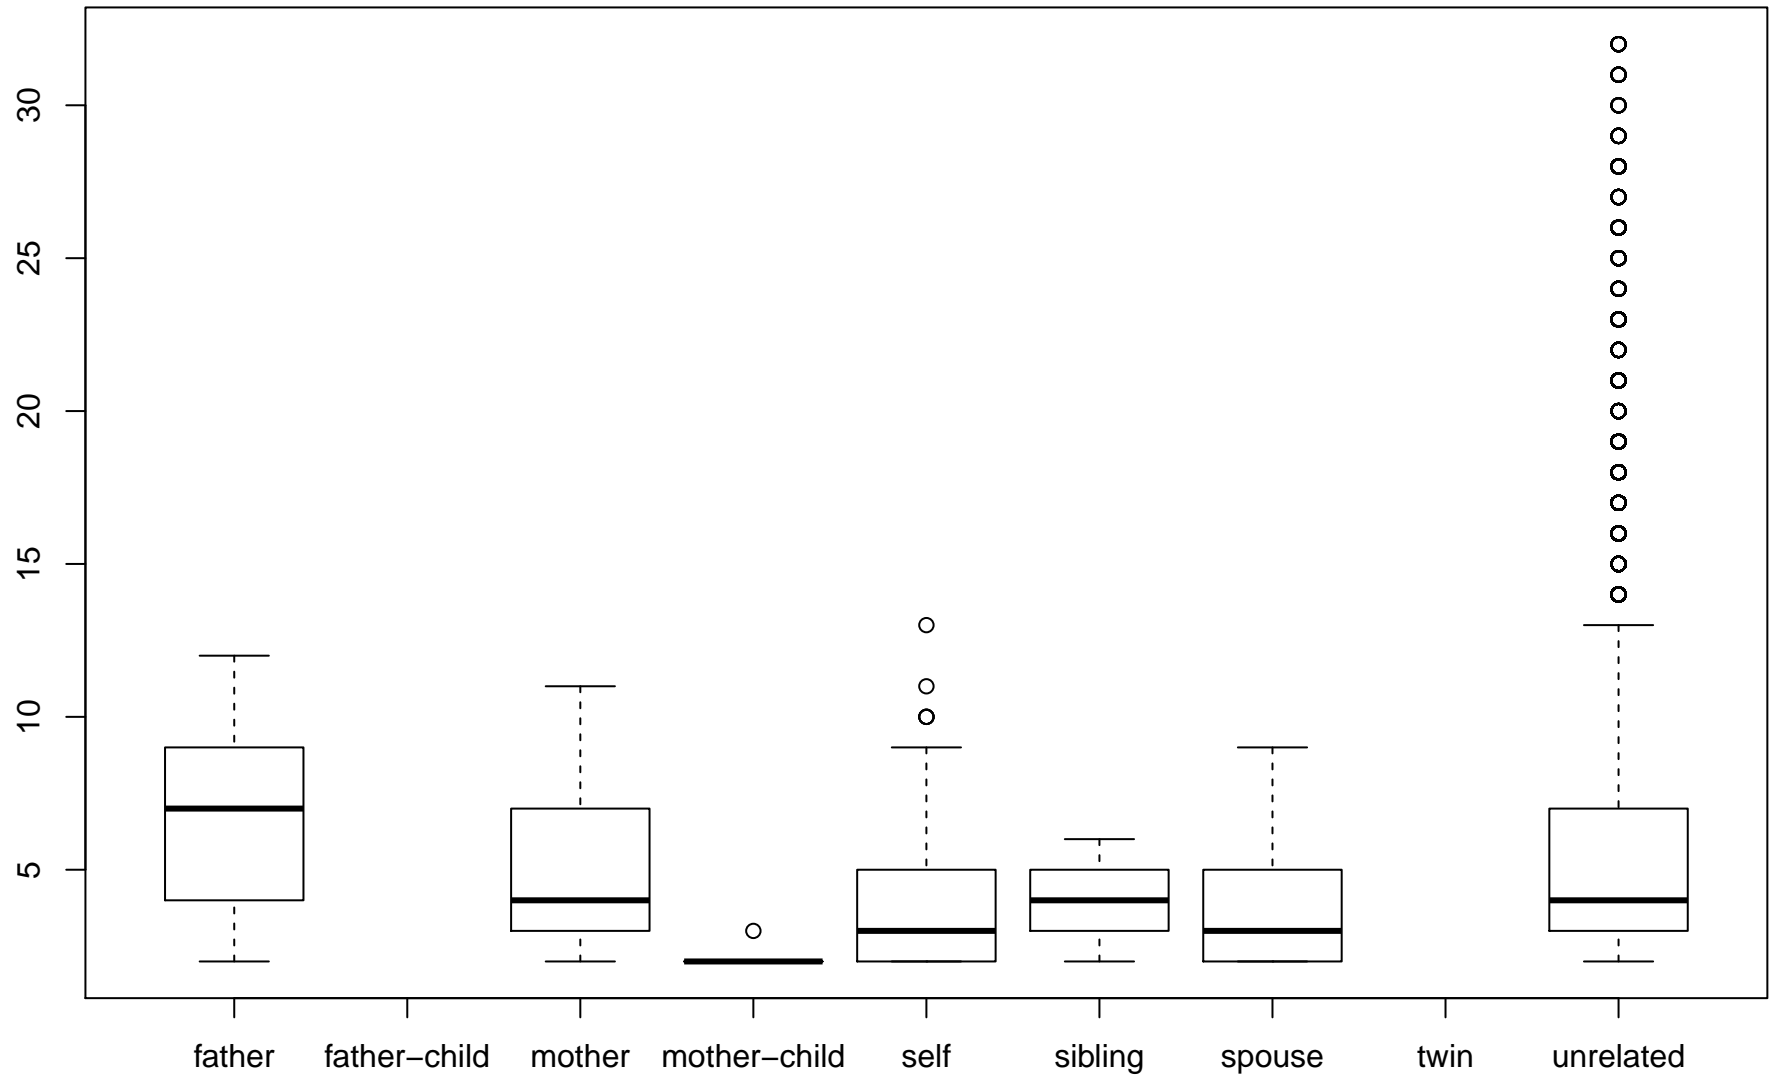

# Dorea longicatena

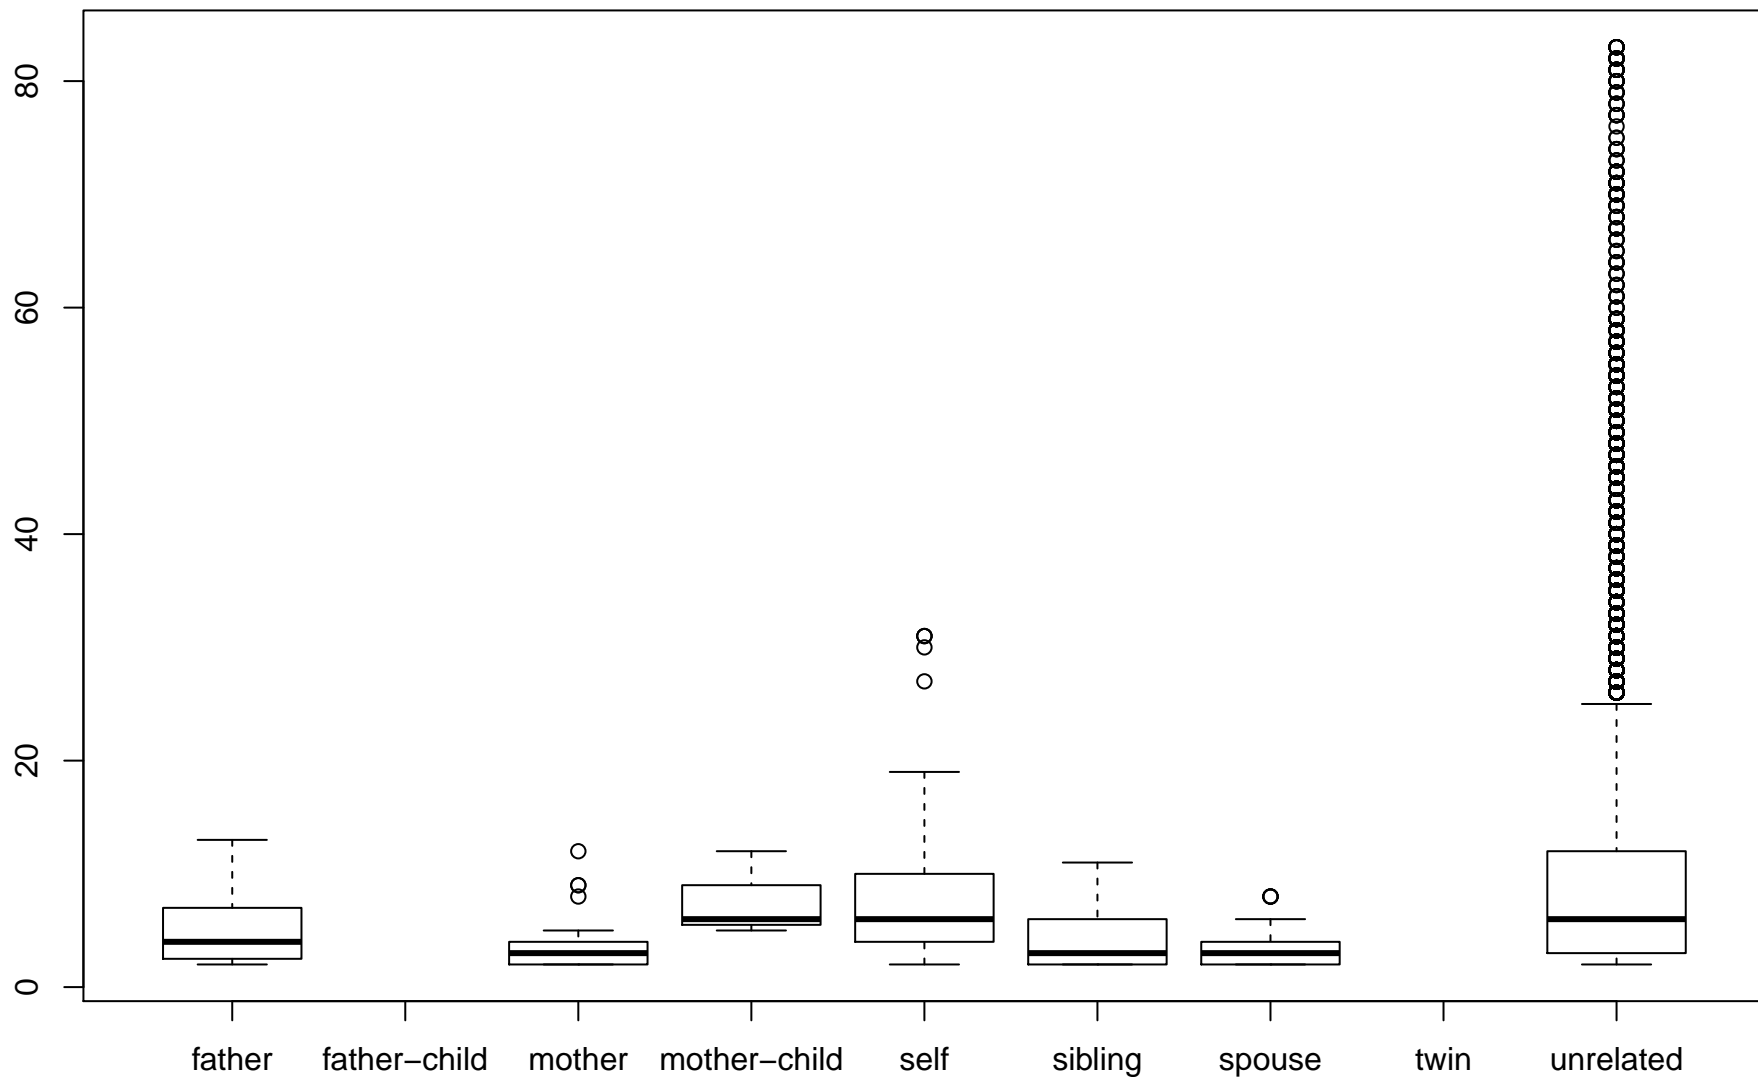

# Eubacterium ventriosum

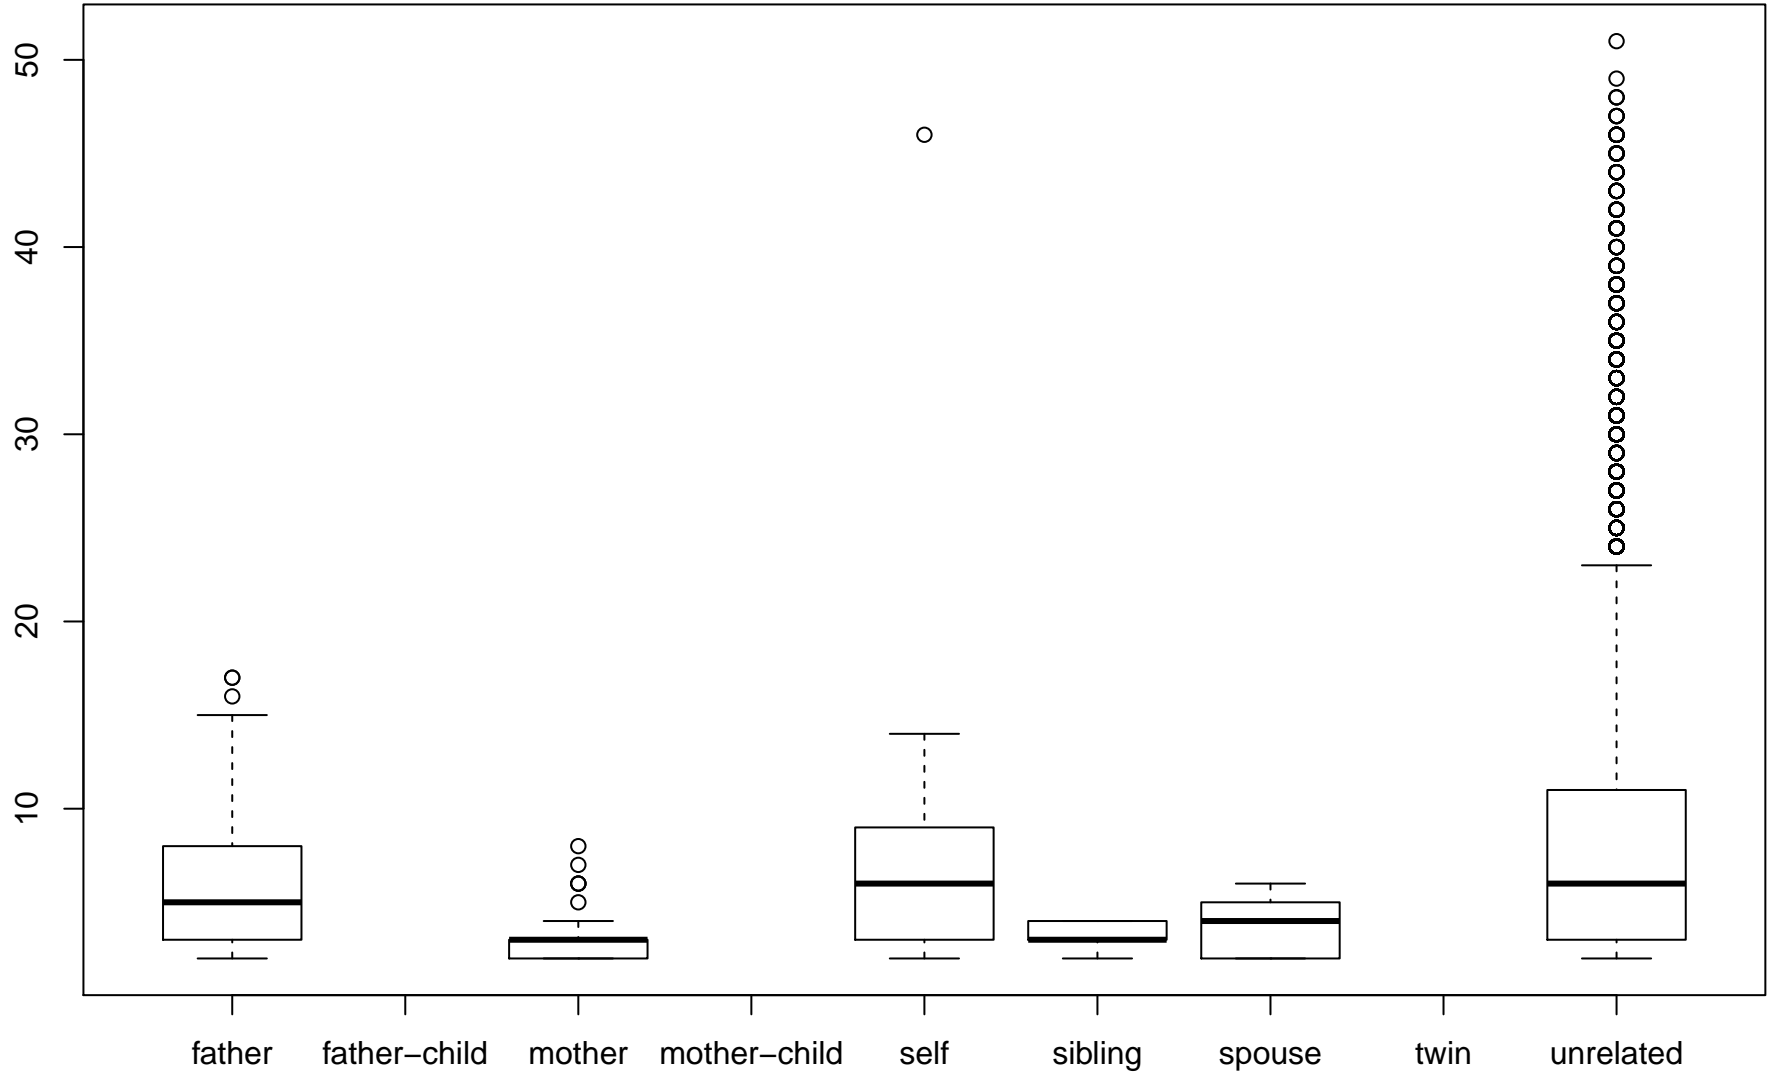

# Clostridium scindens

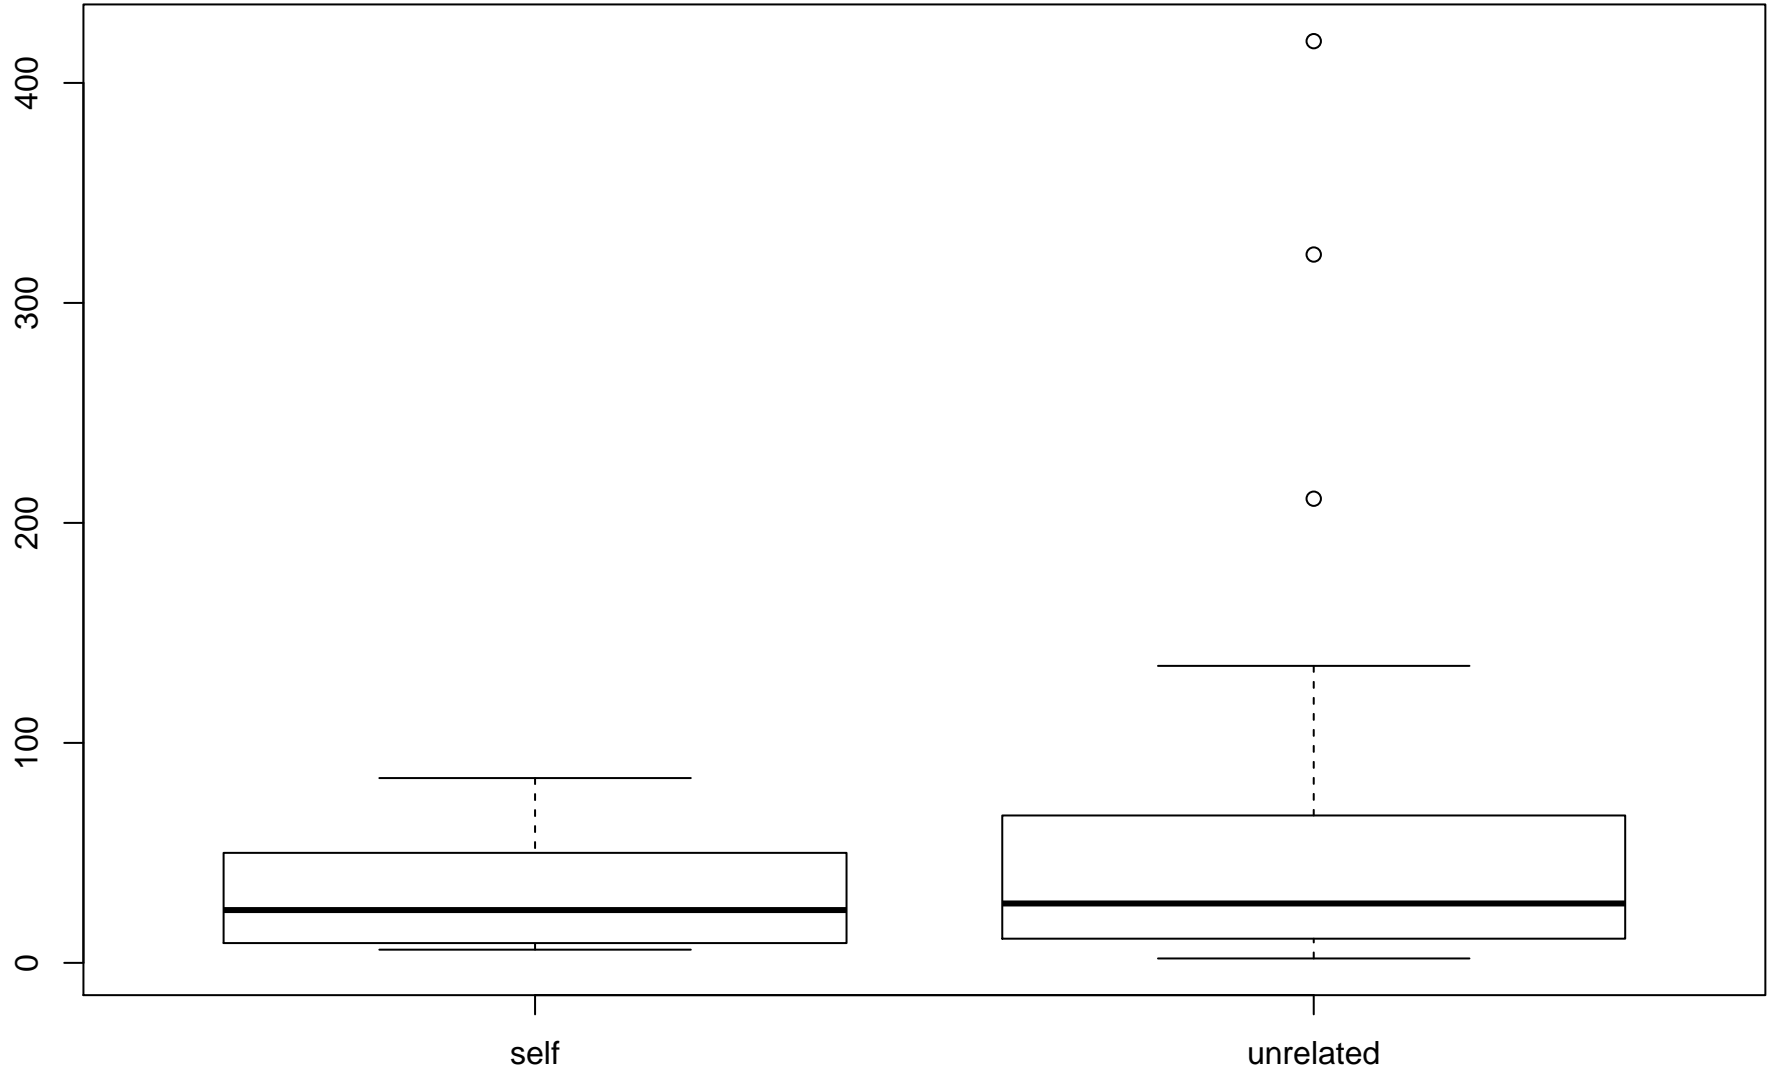

# Eubacterium hallii

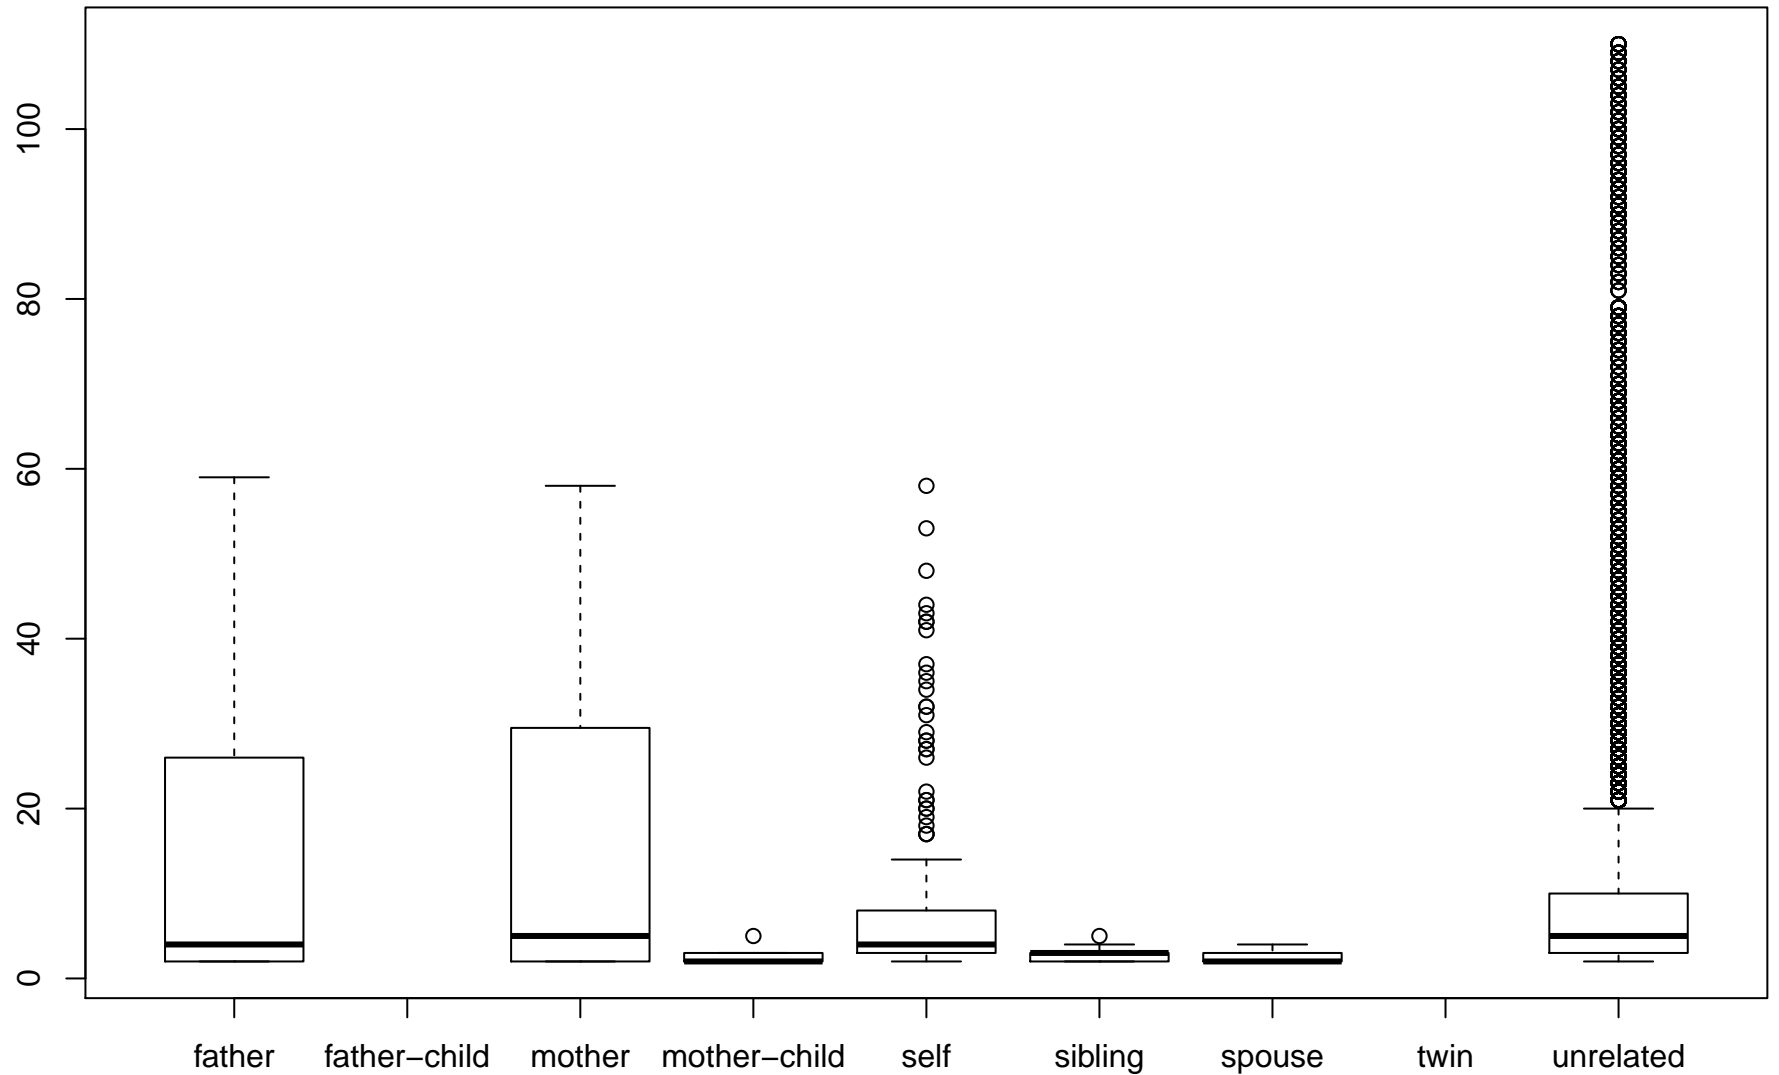

# Ruminococcus gnavus

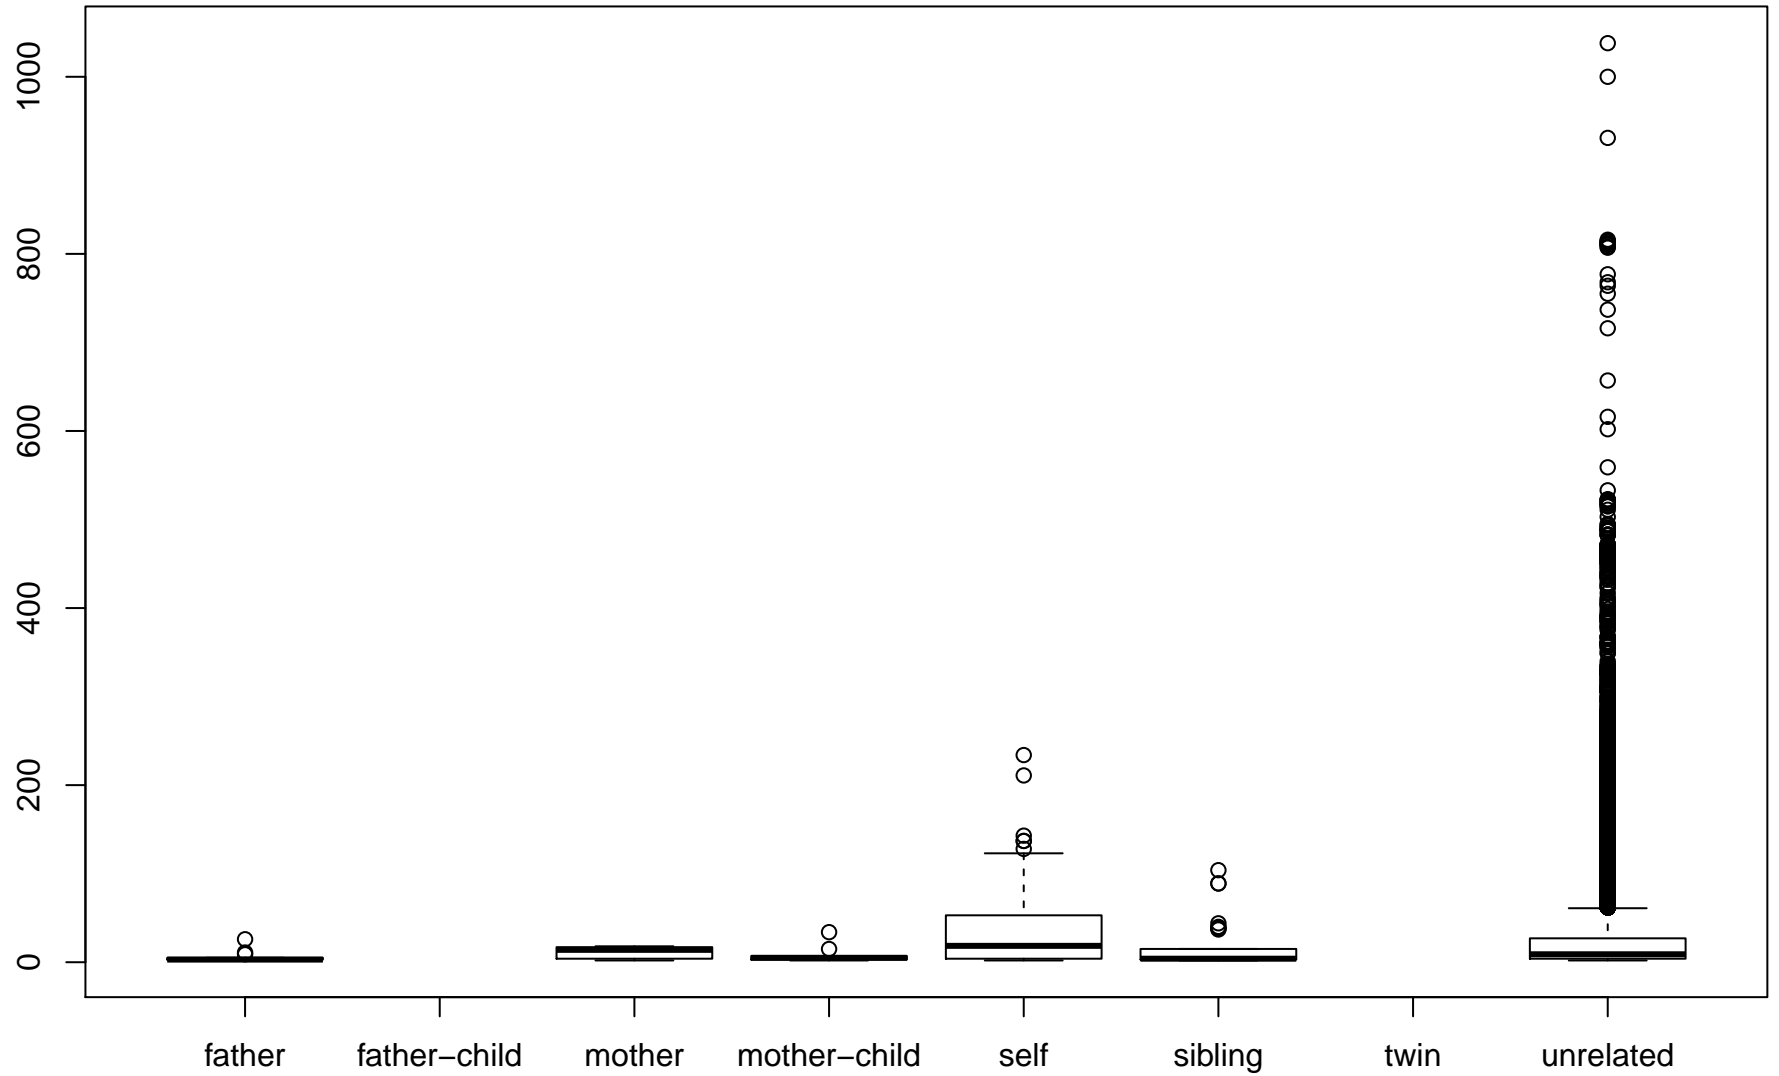



# Coprococcus eutactus

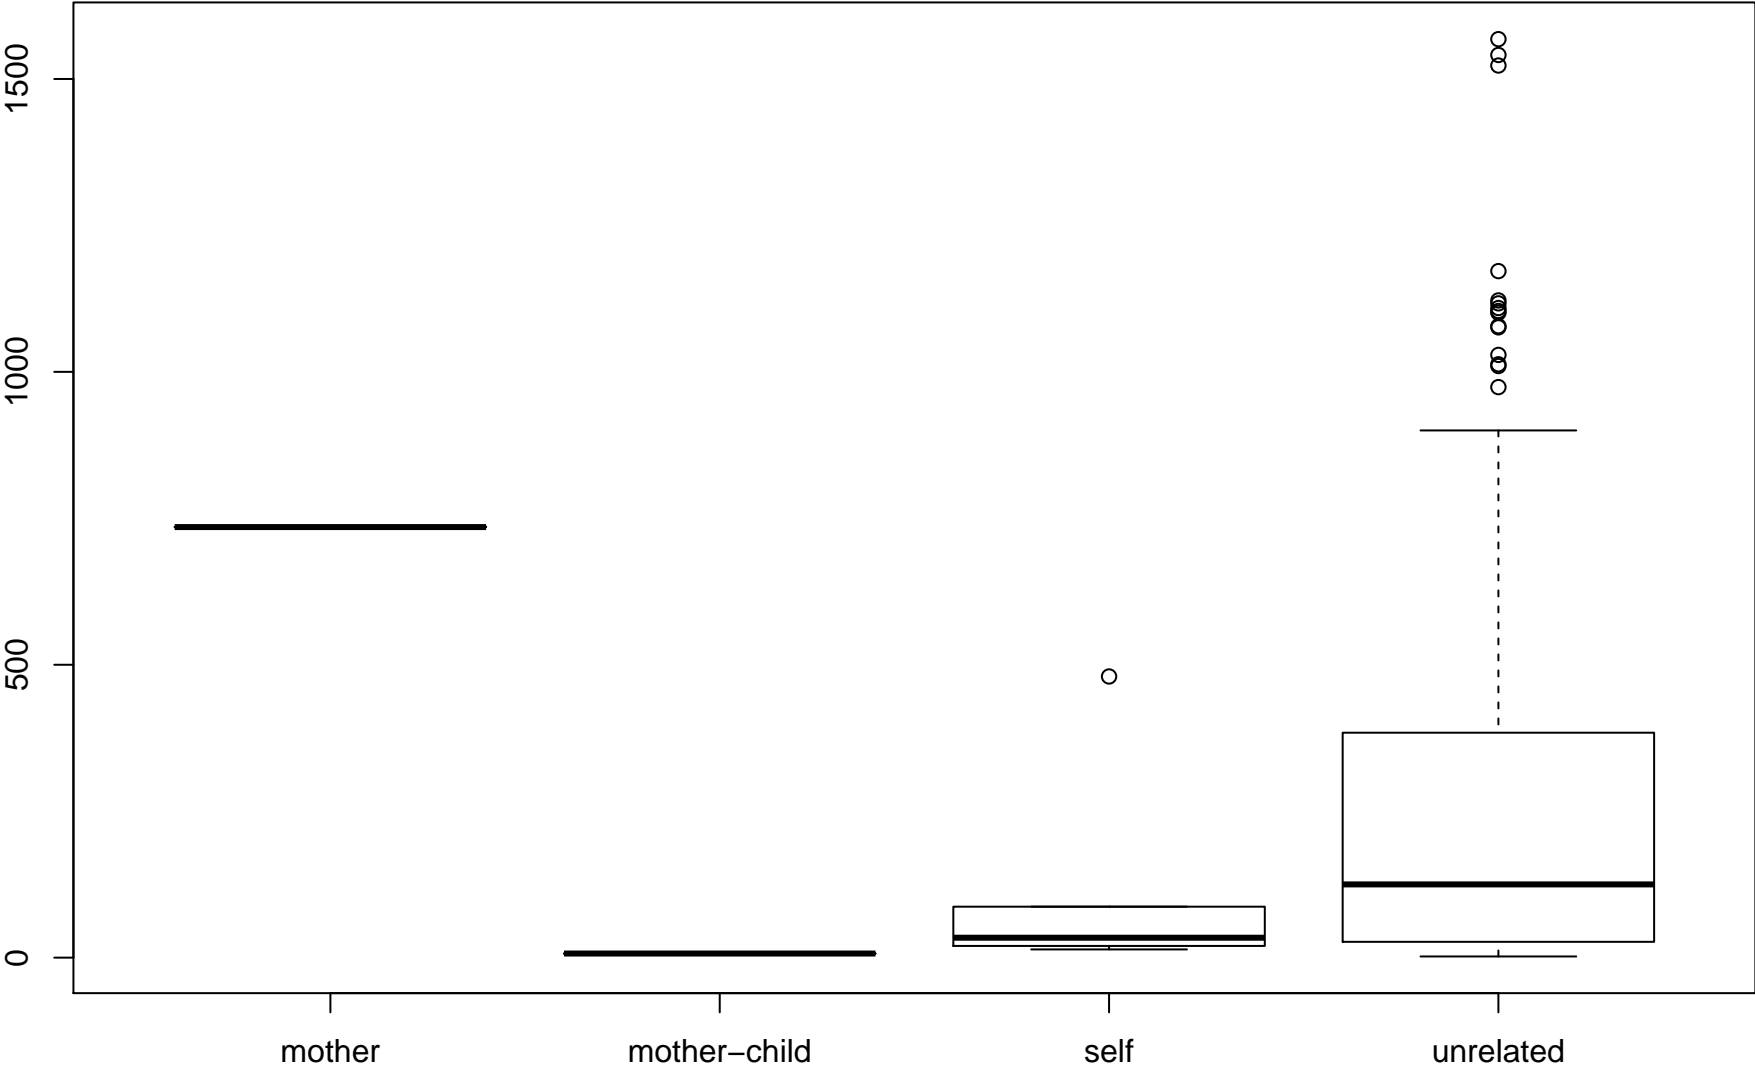

# Clostridium sp.

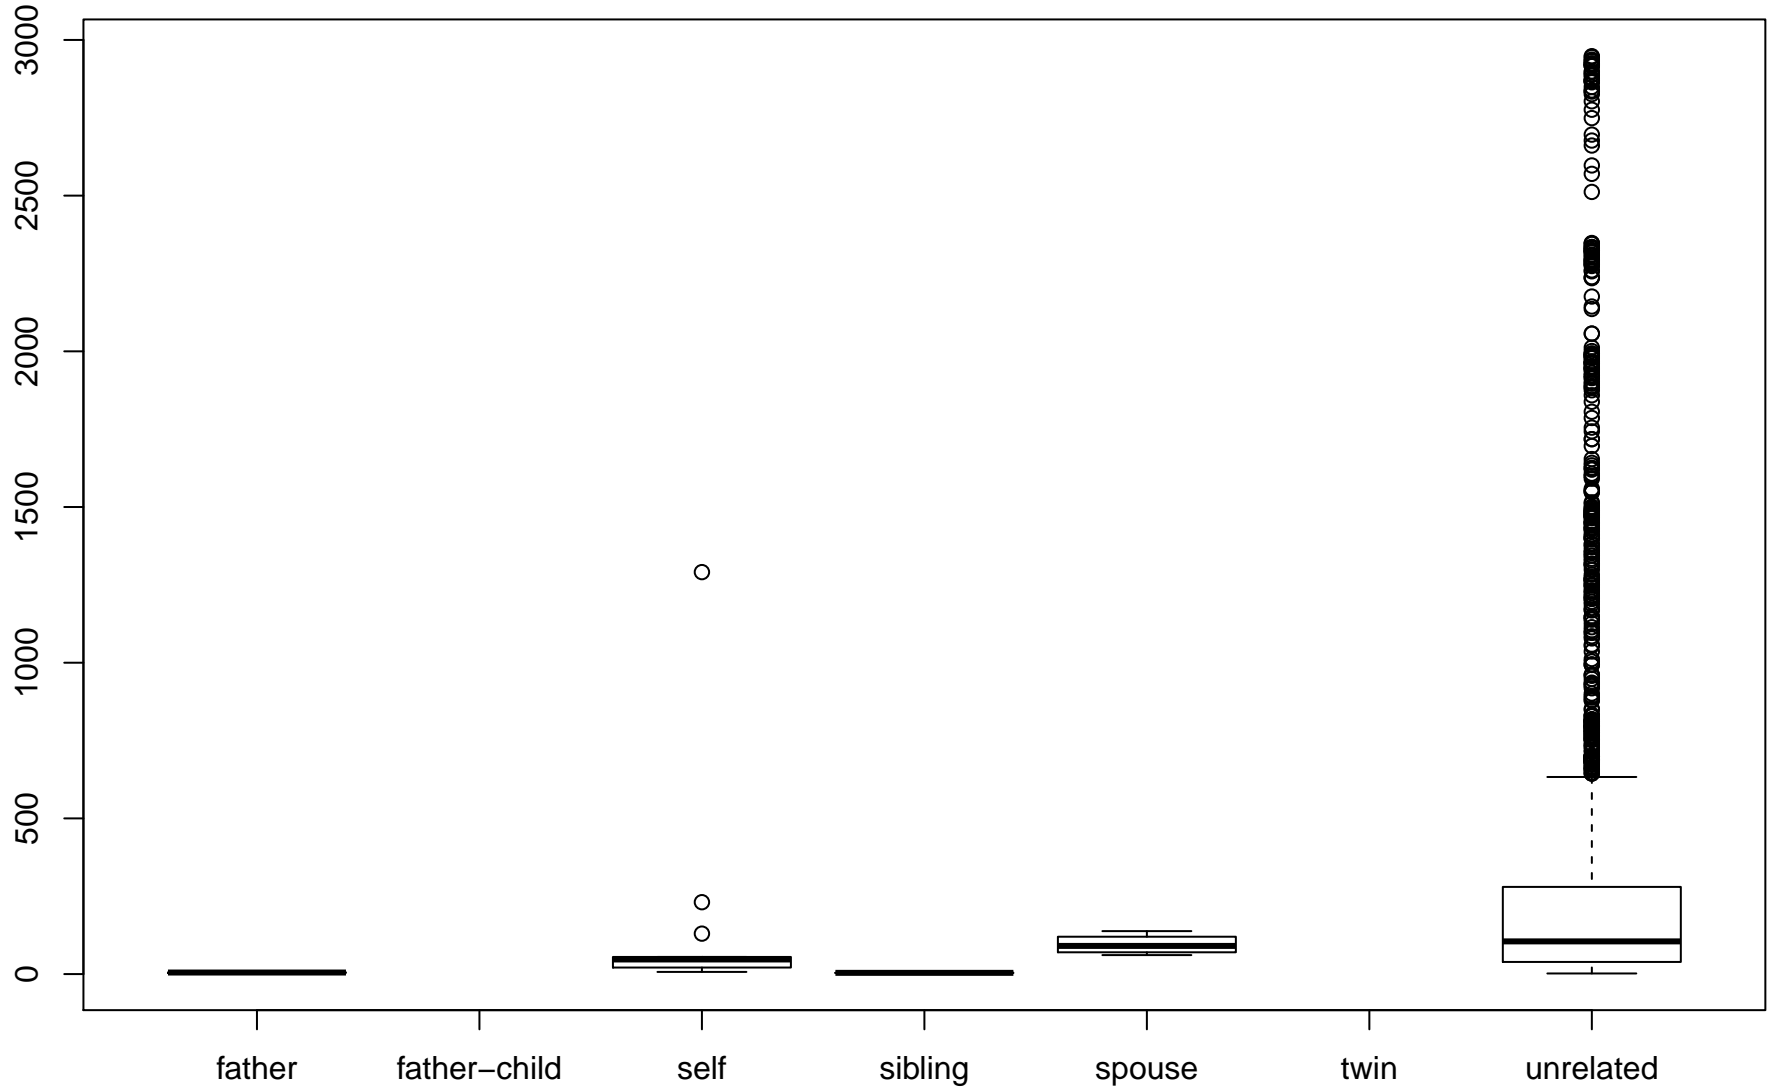

# Anaerostipes caccae

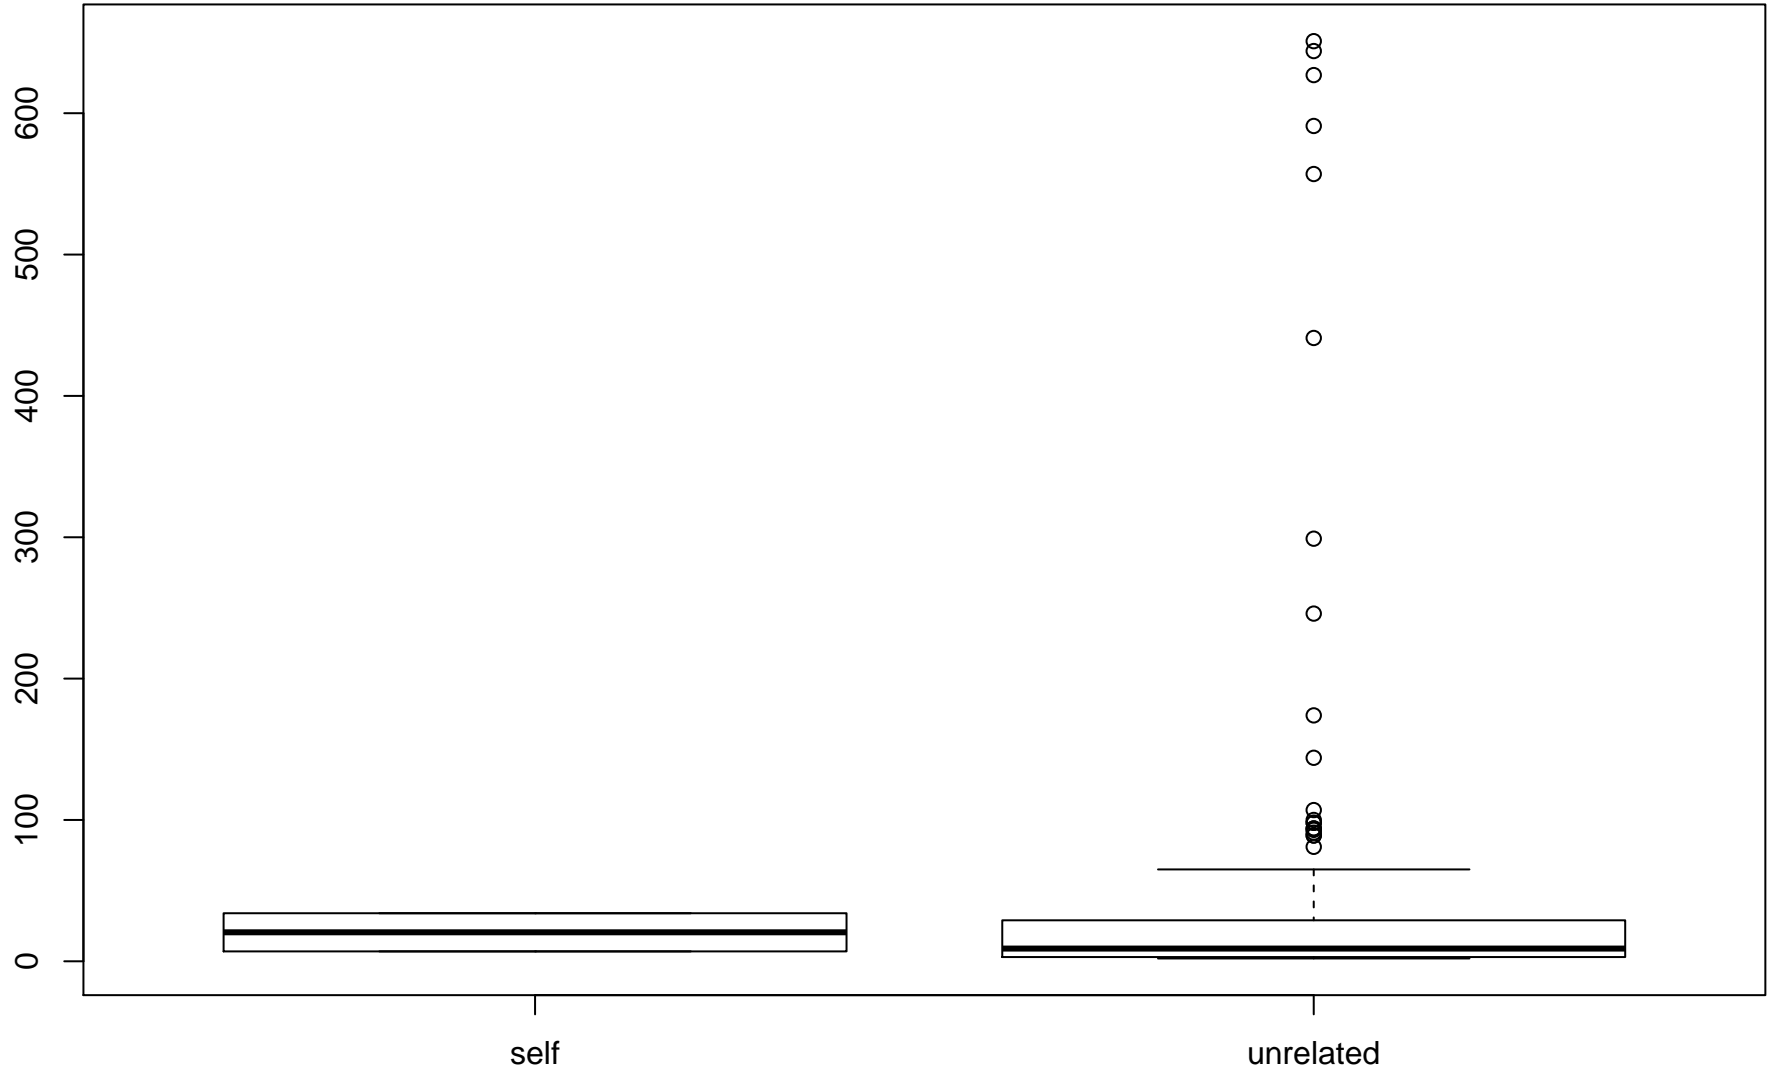

# Clostridium bolteae

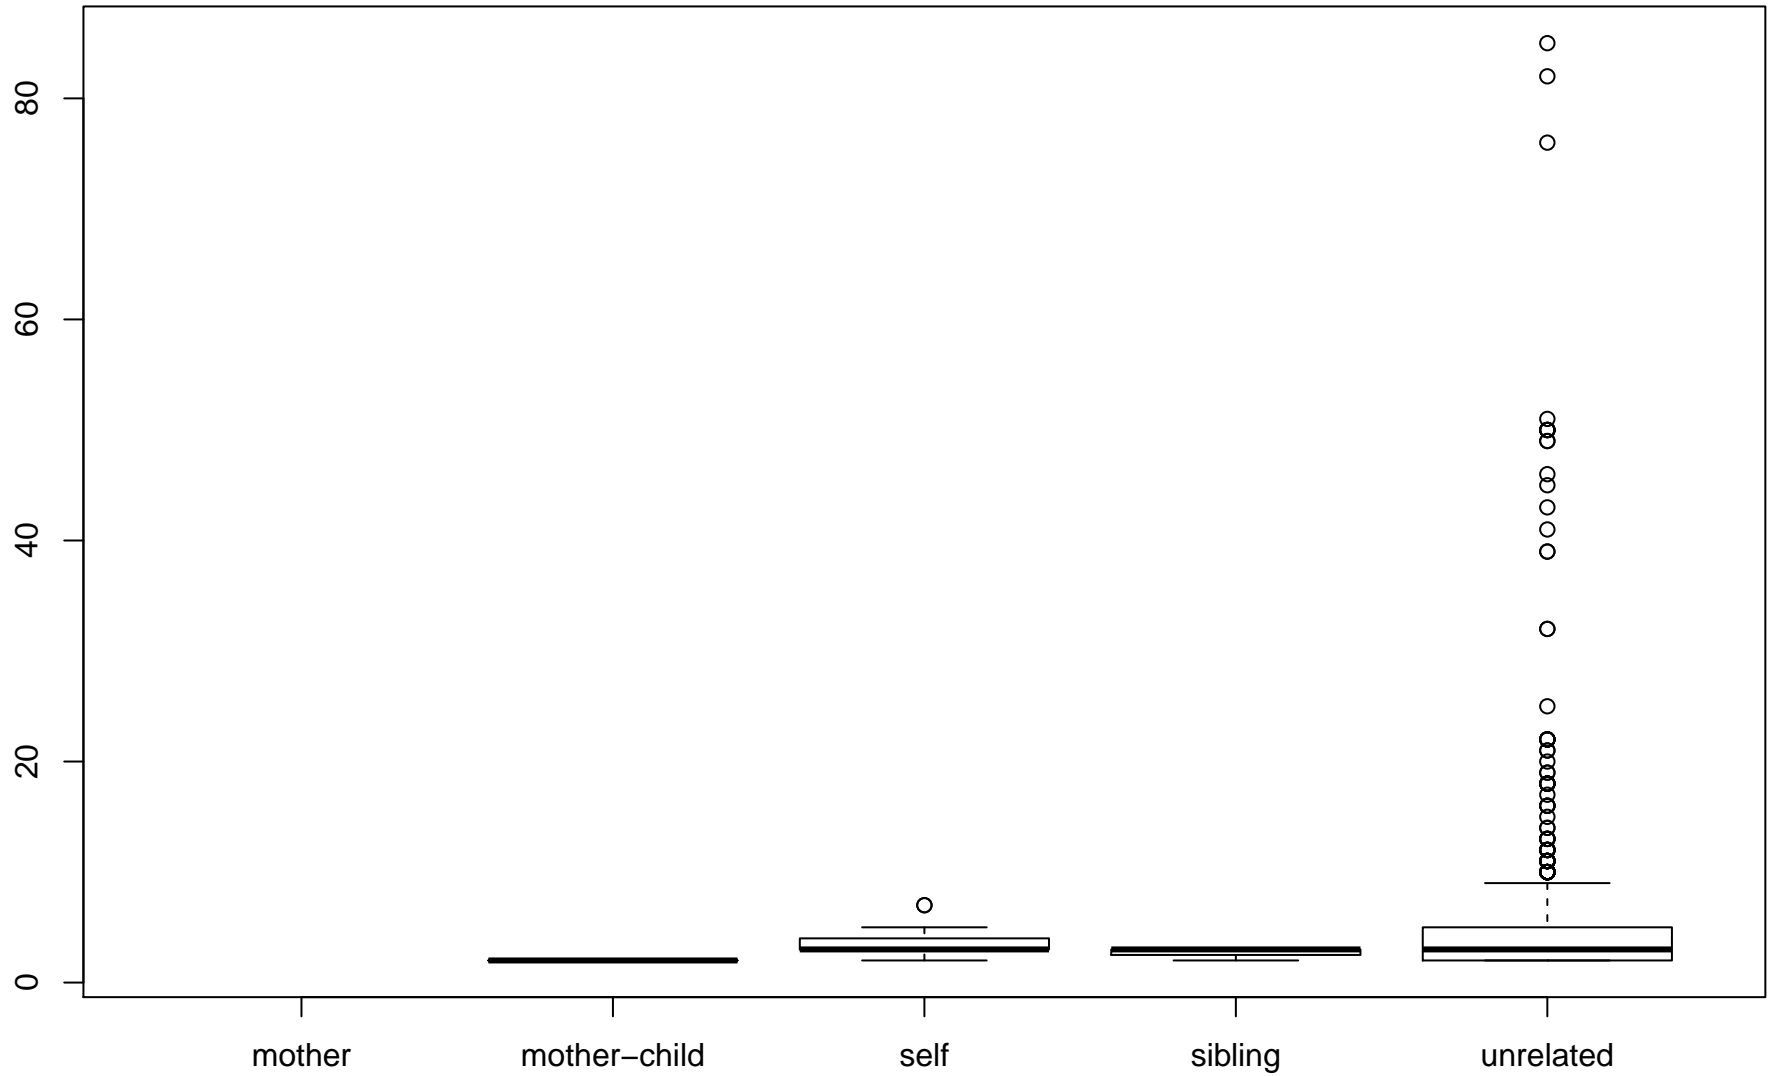

***Collinsella aerofaciens***

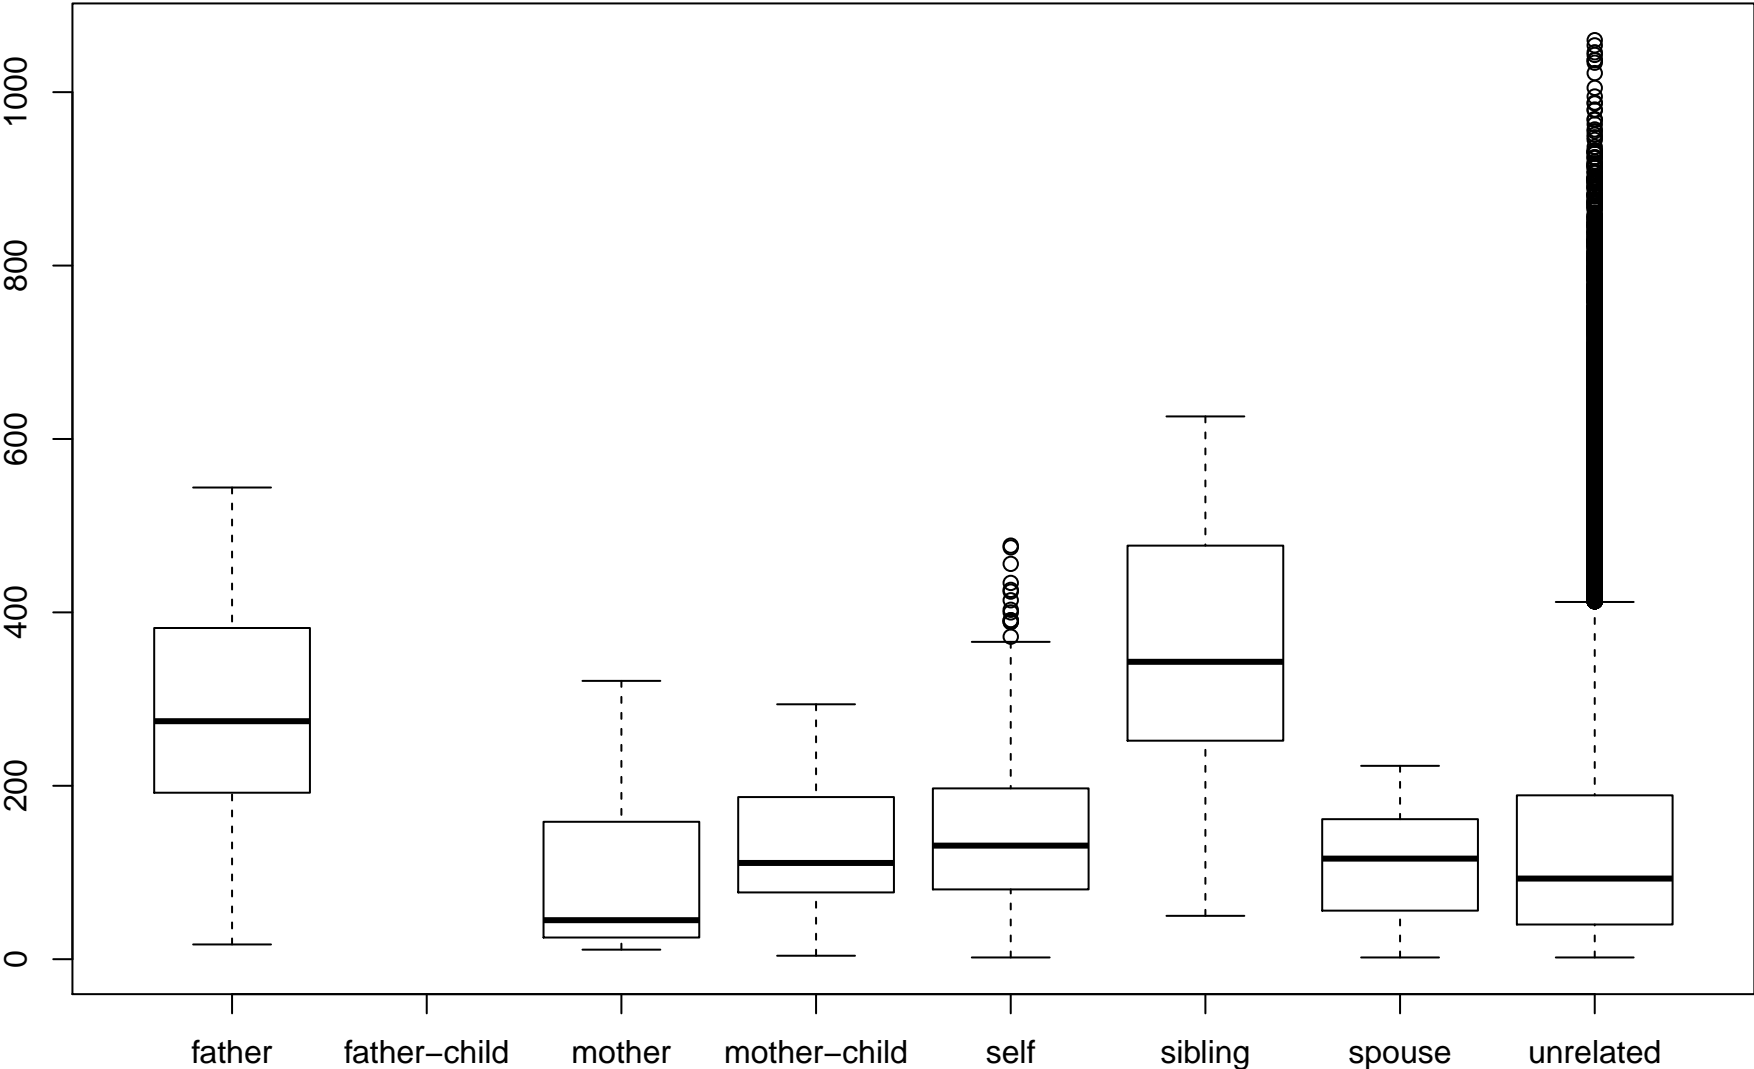

# Clostridium leptum

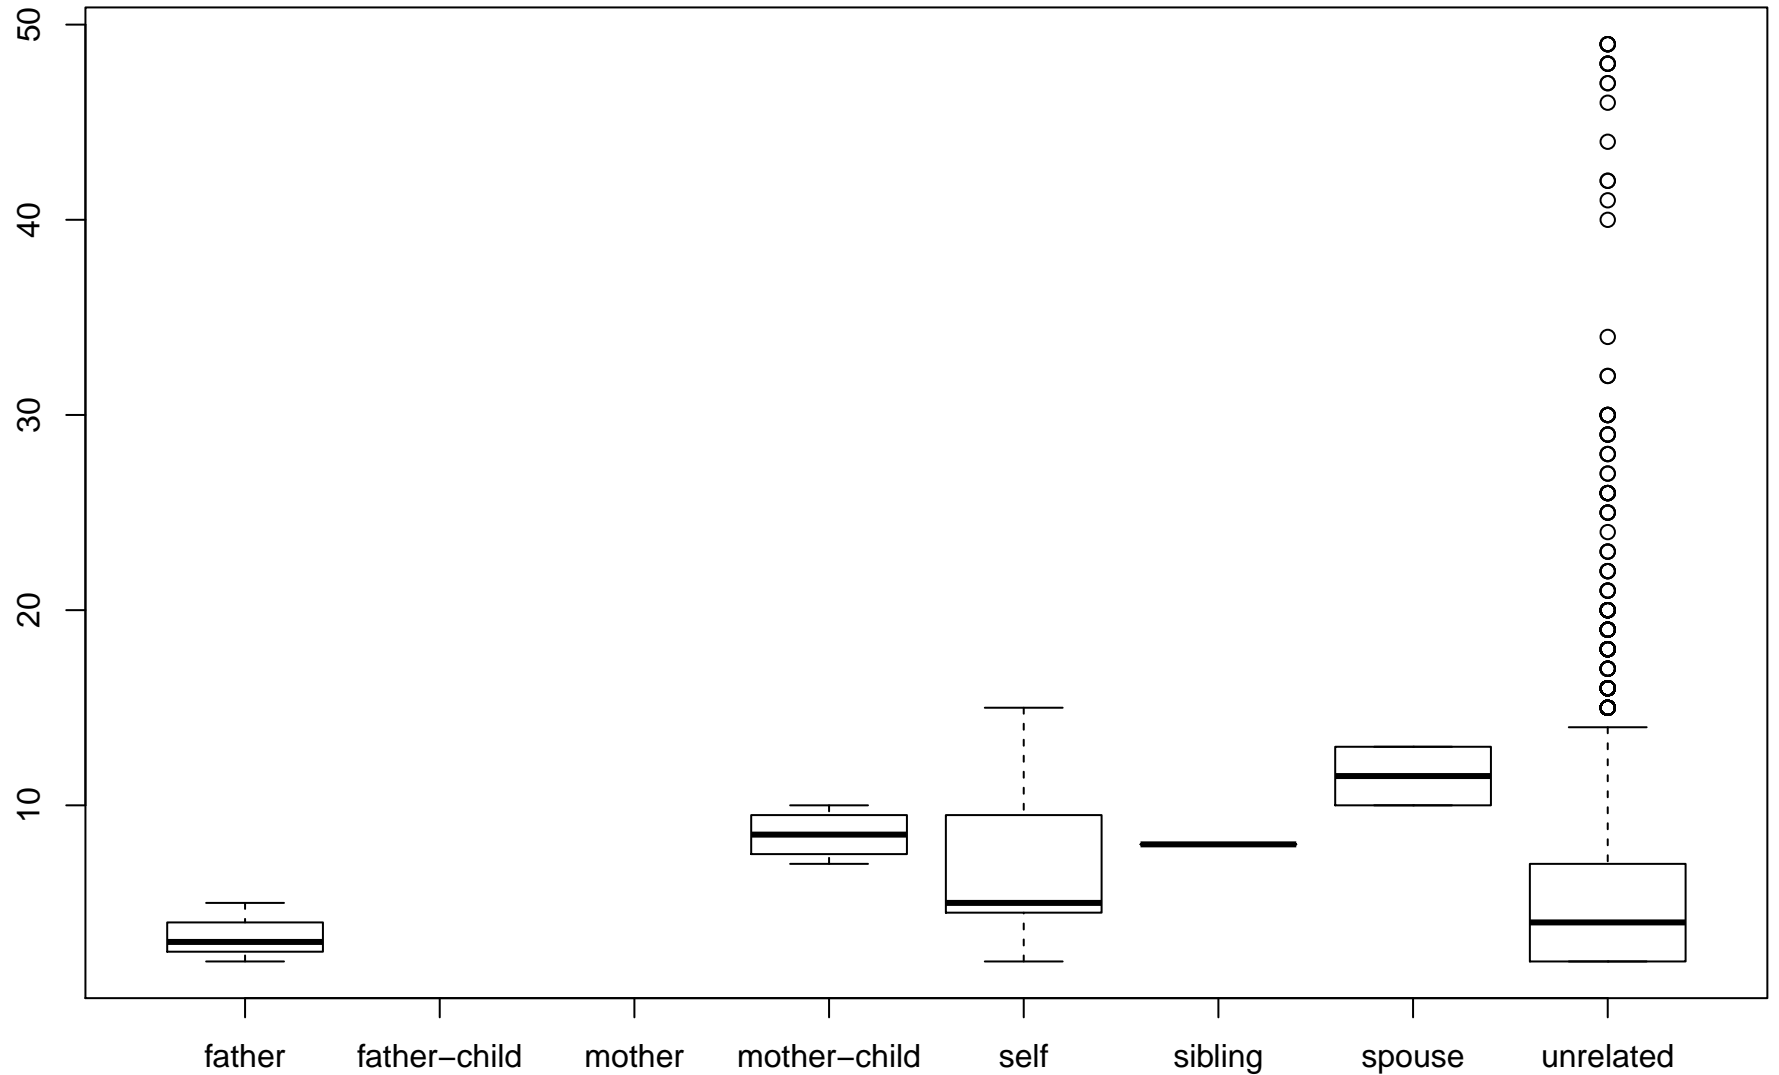

# Clostridium spiroforme

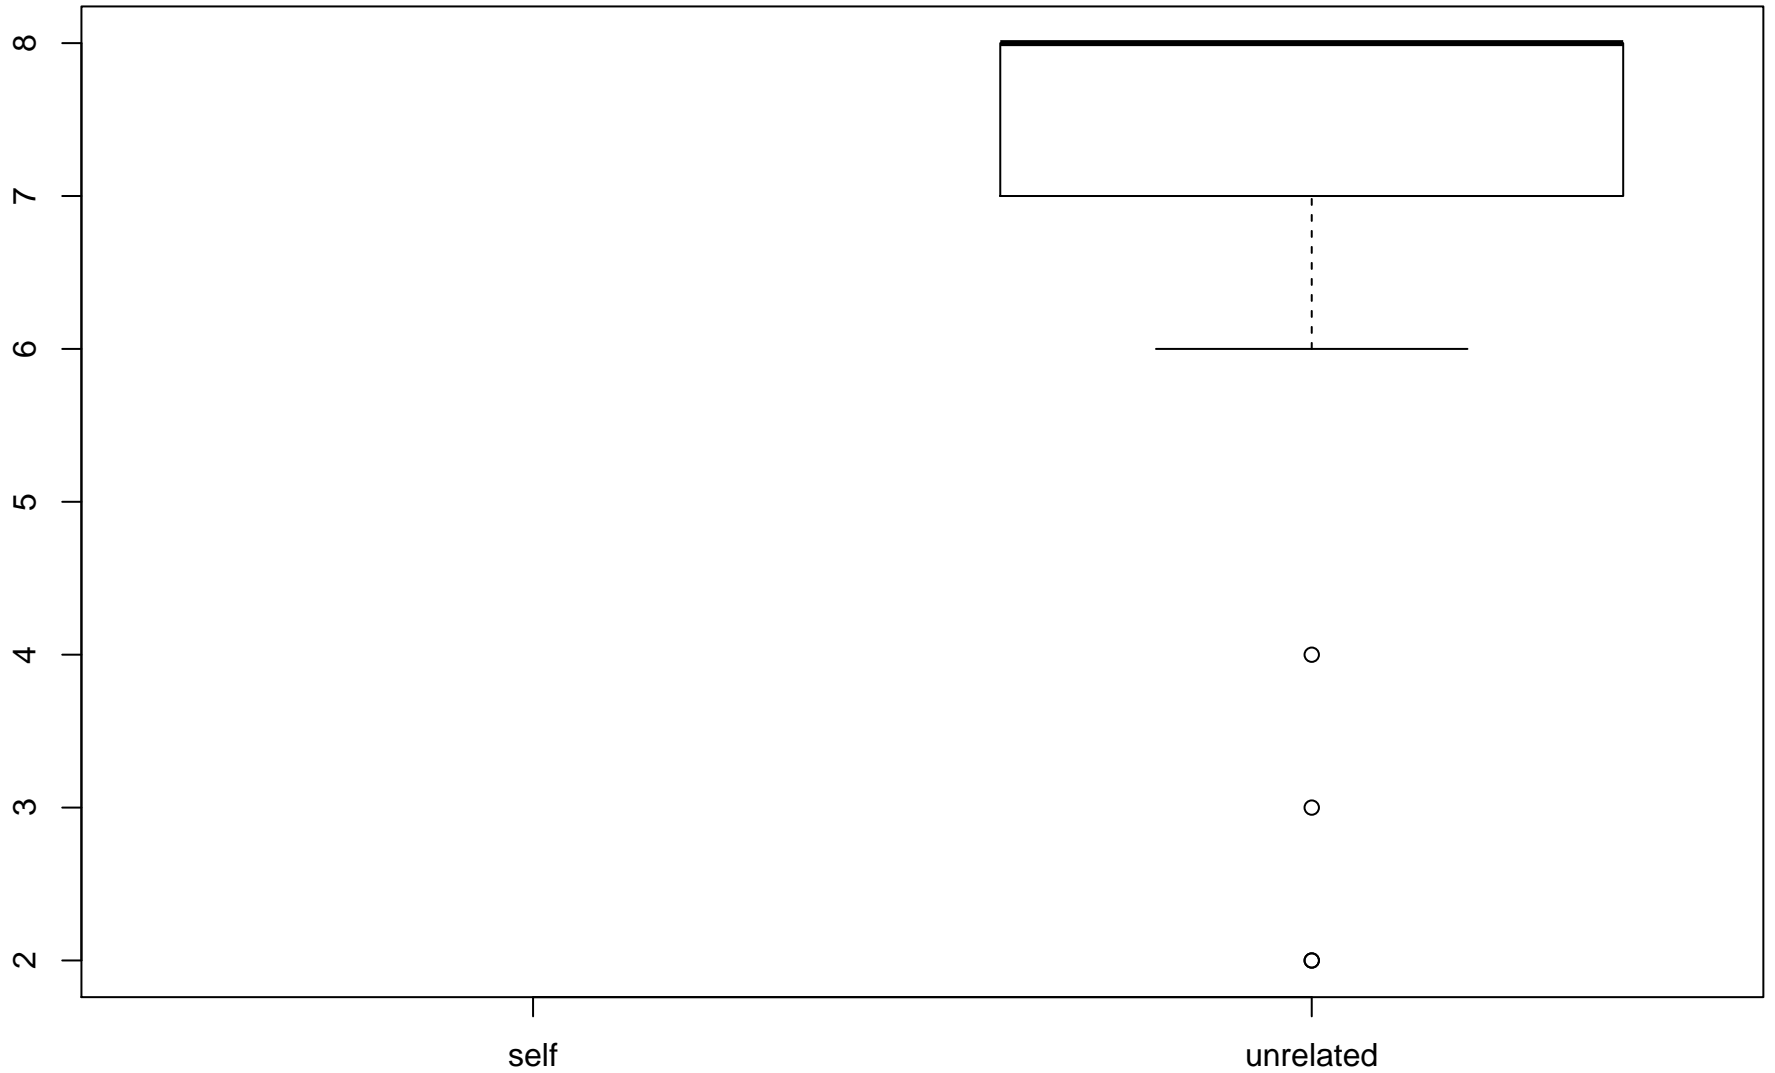

# Anaerotruncus colihominis

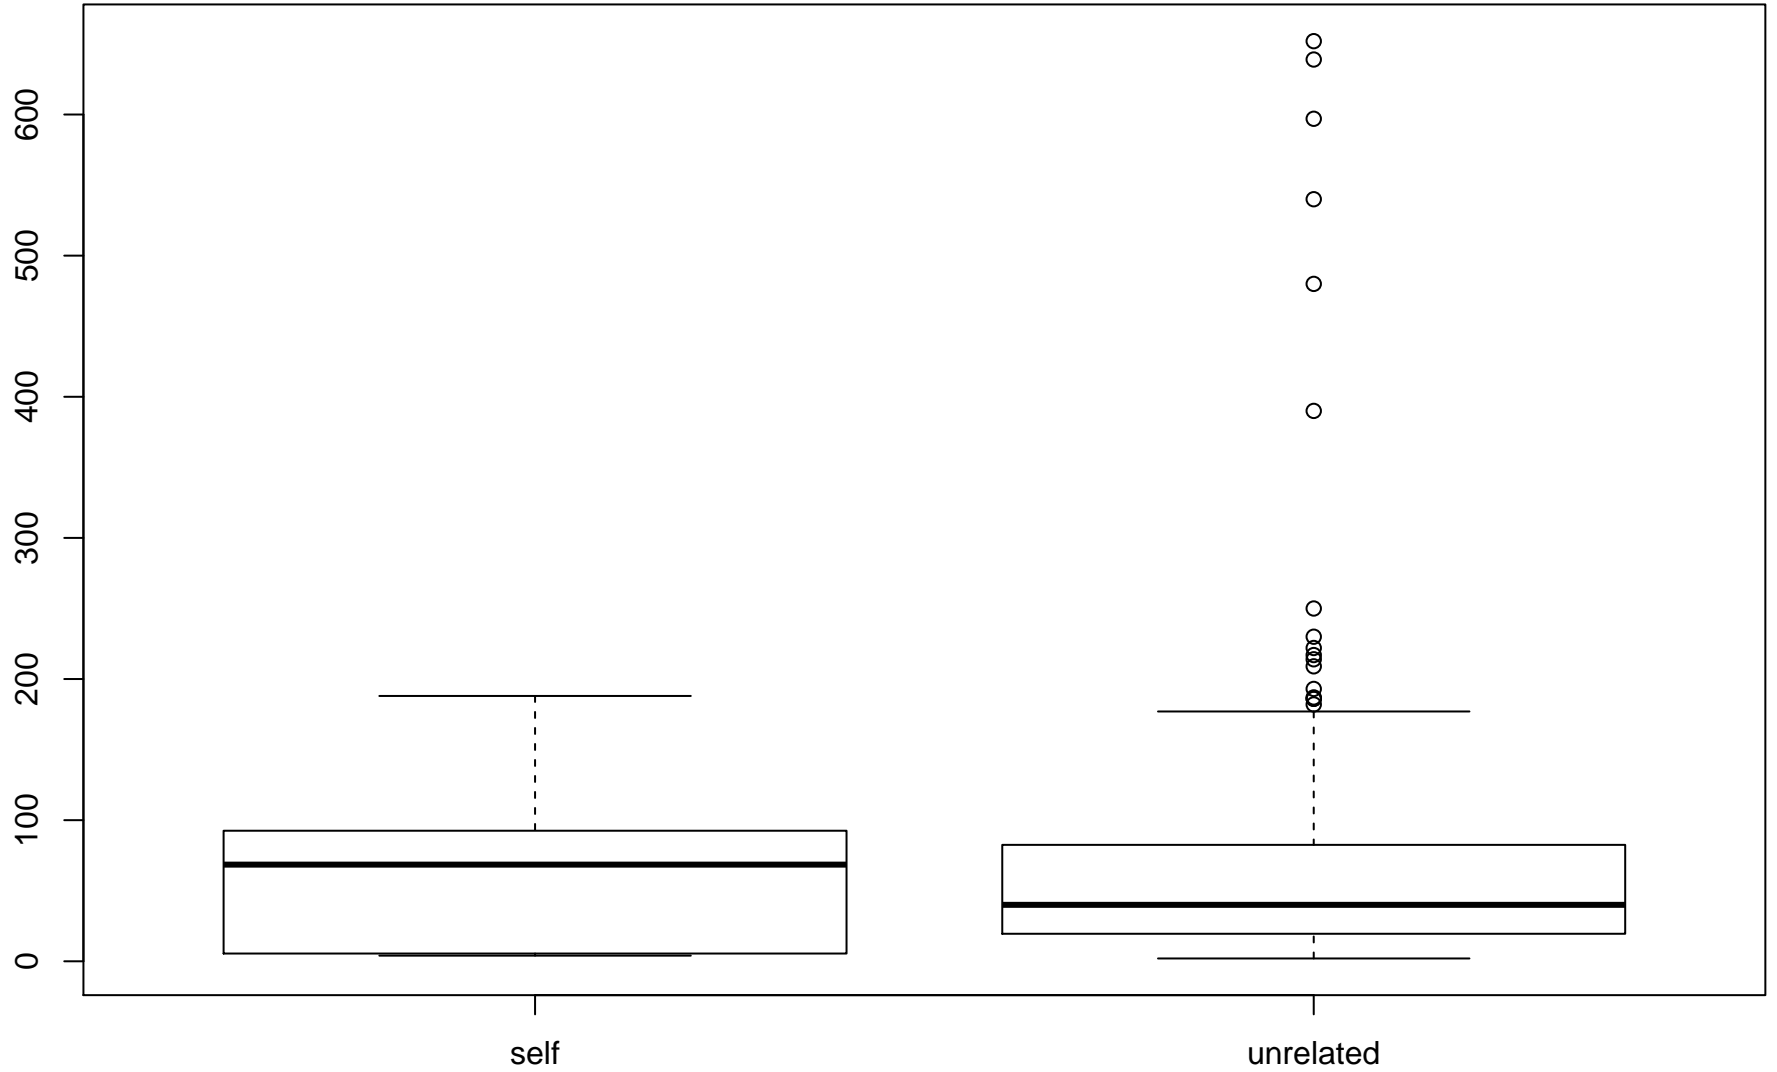



# Intestinibacter bartlettii

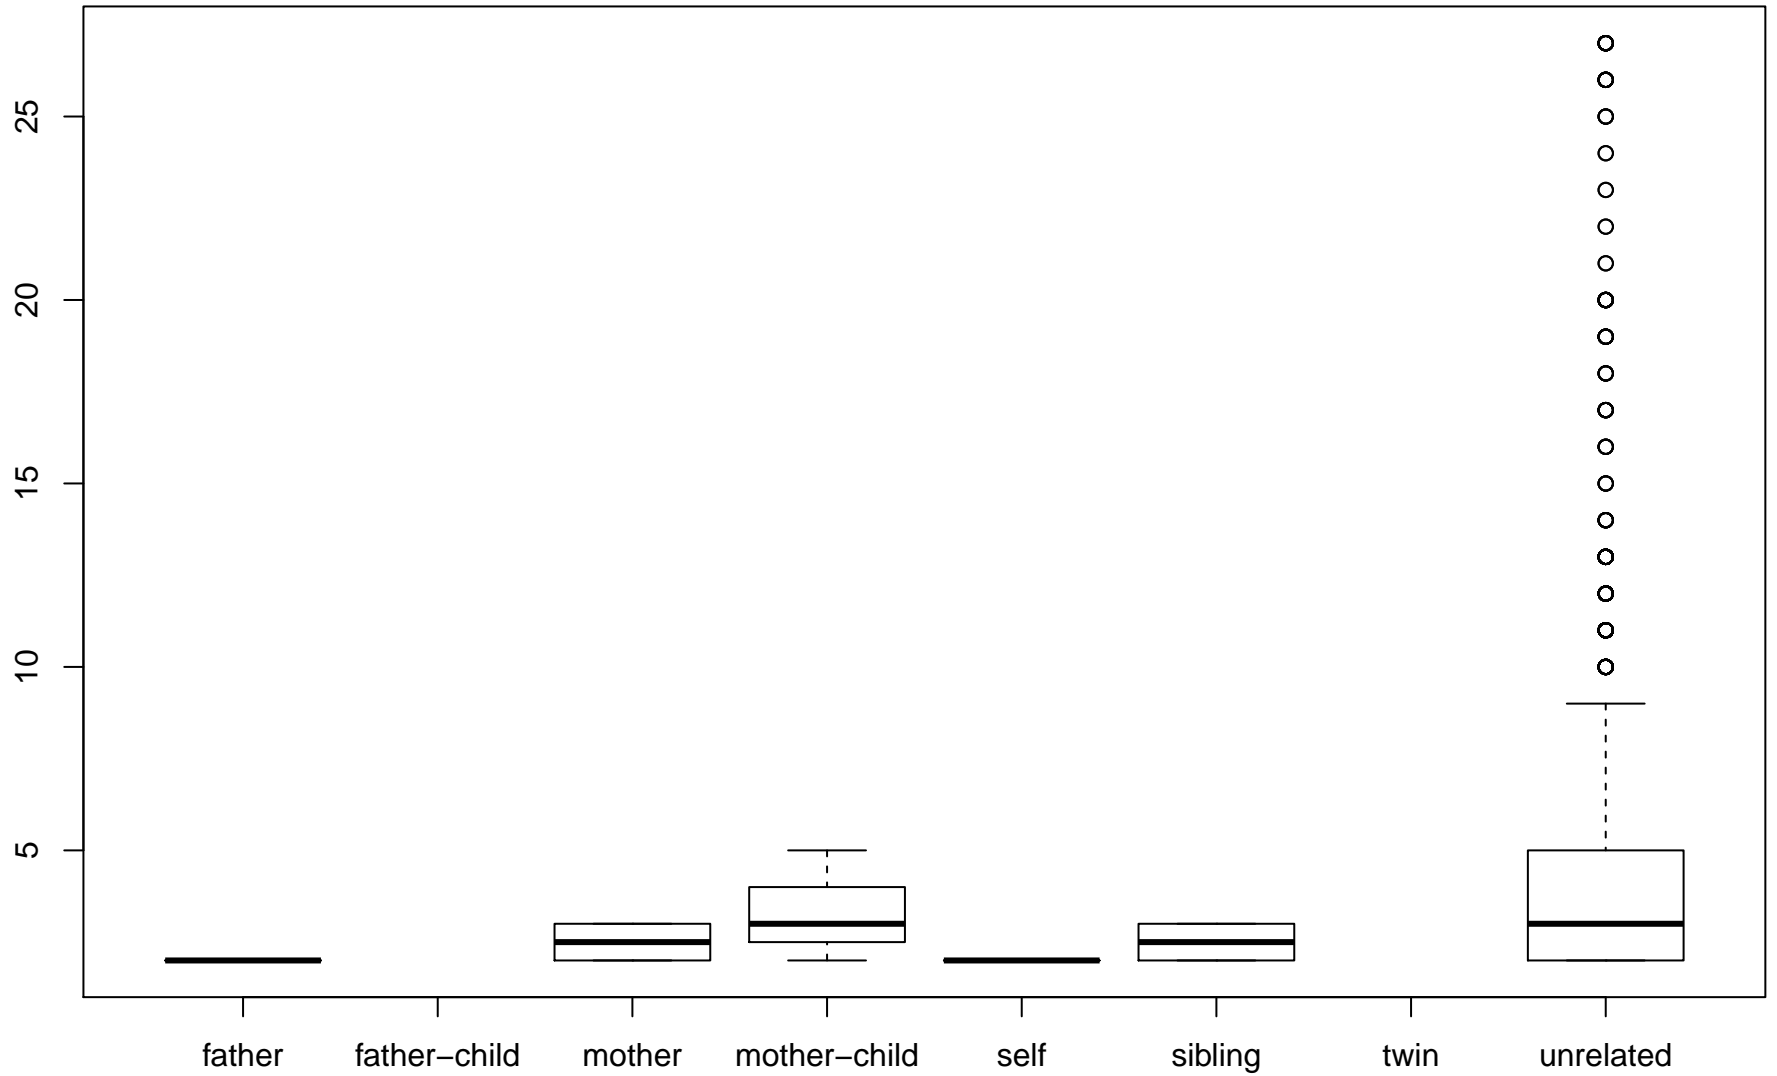

# Erysipelatoclostridium ramosum

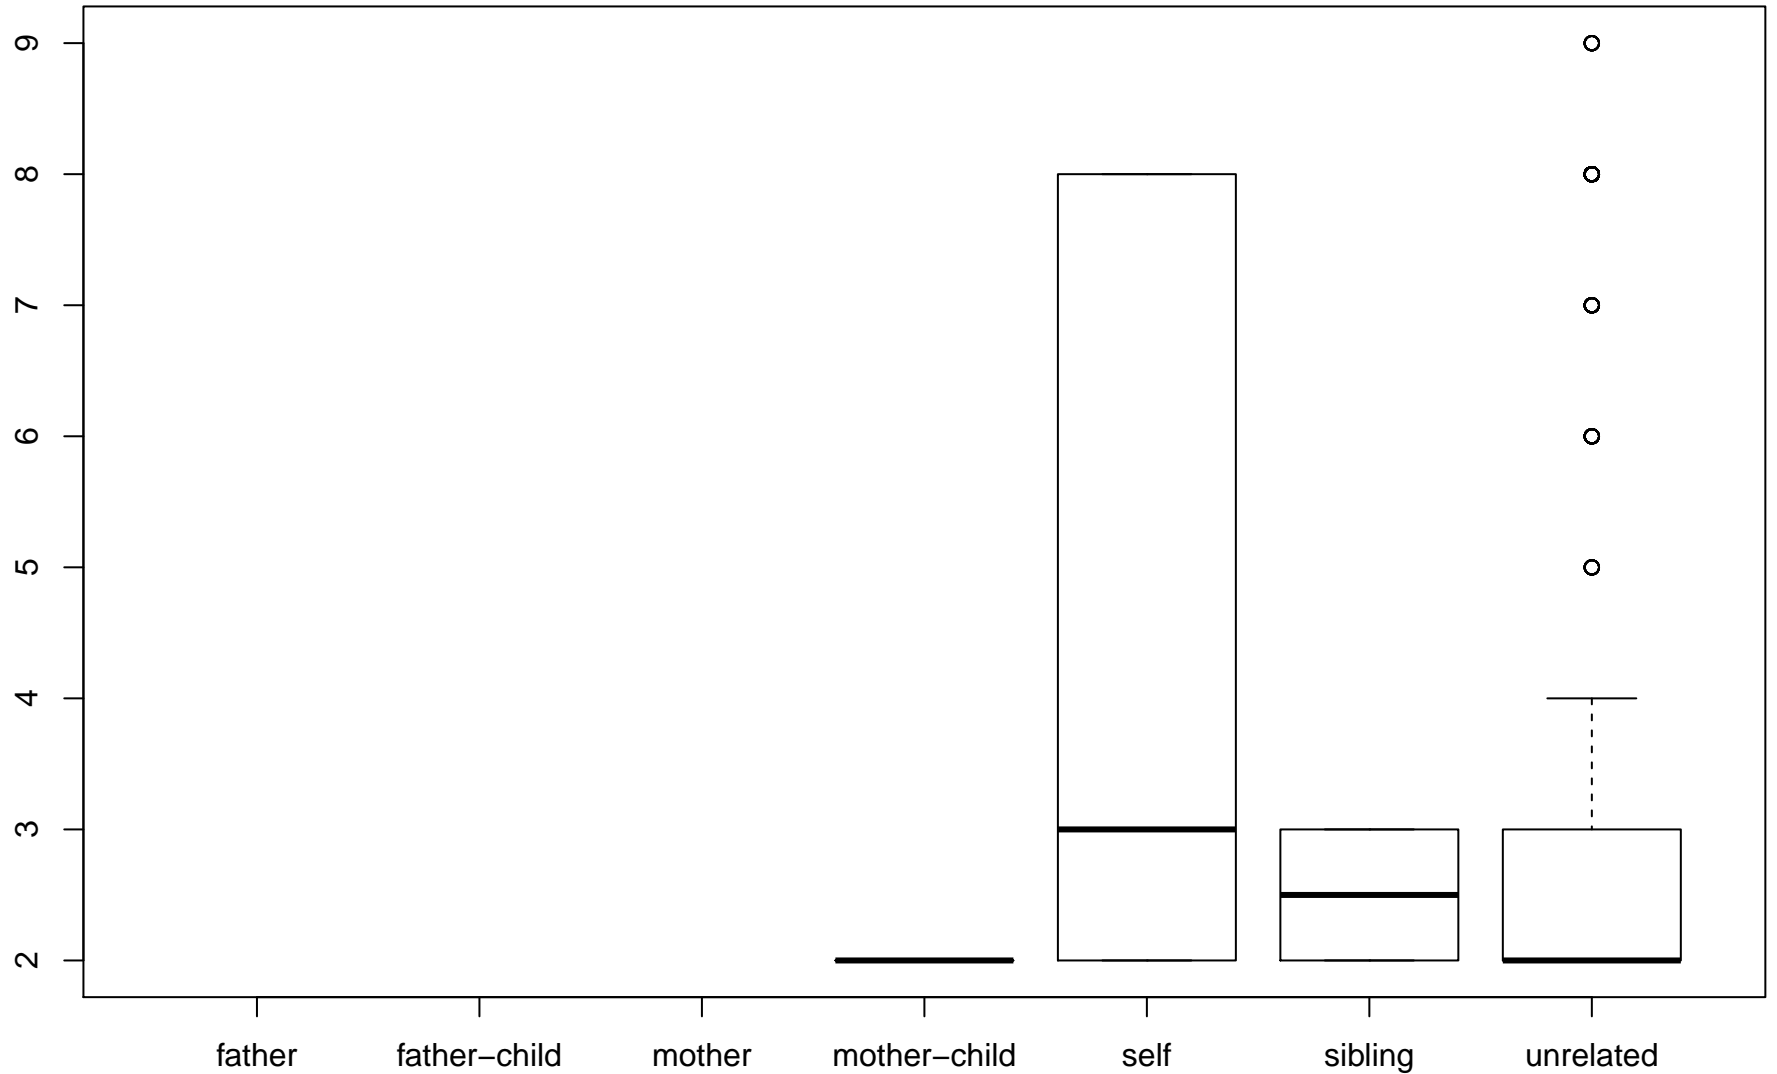

# Coprobacillus sp.

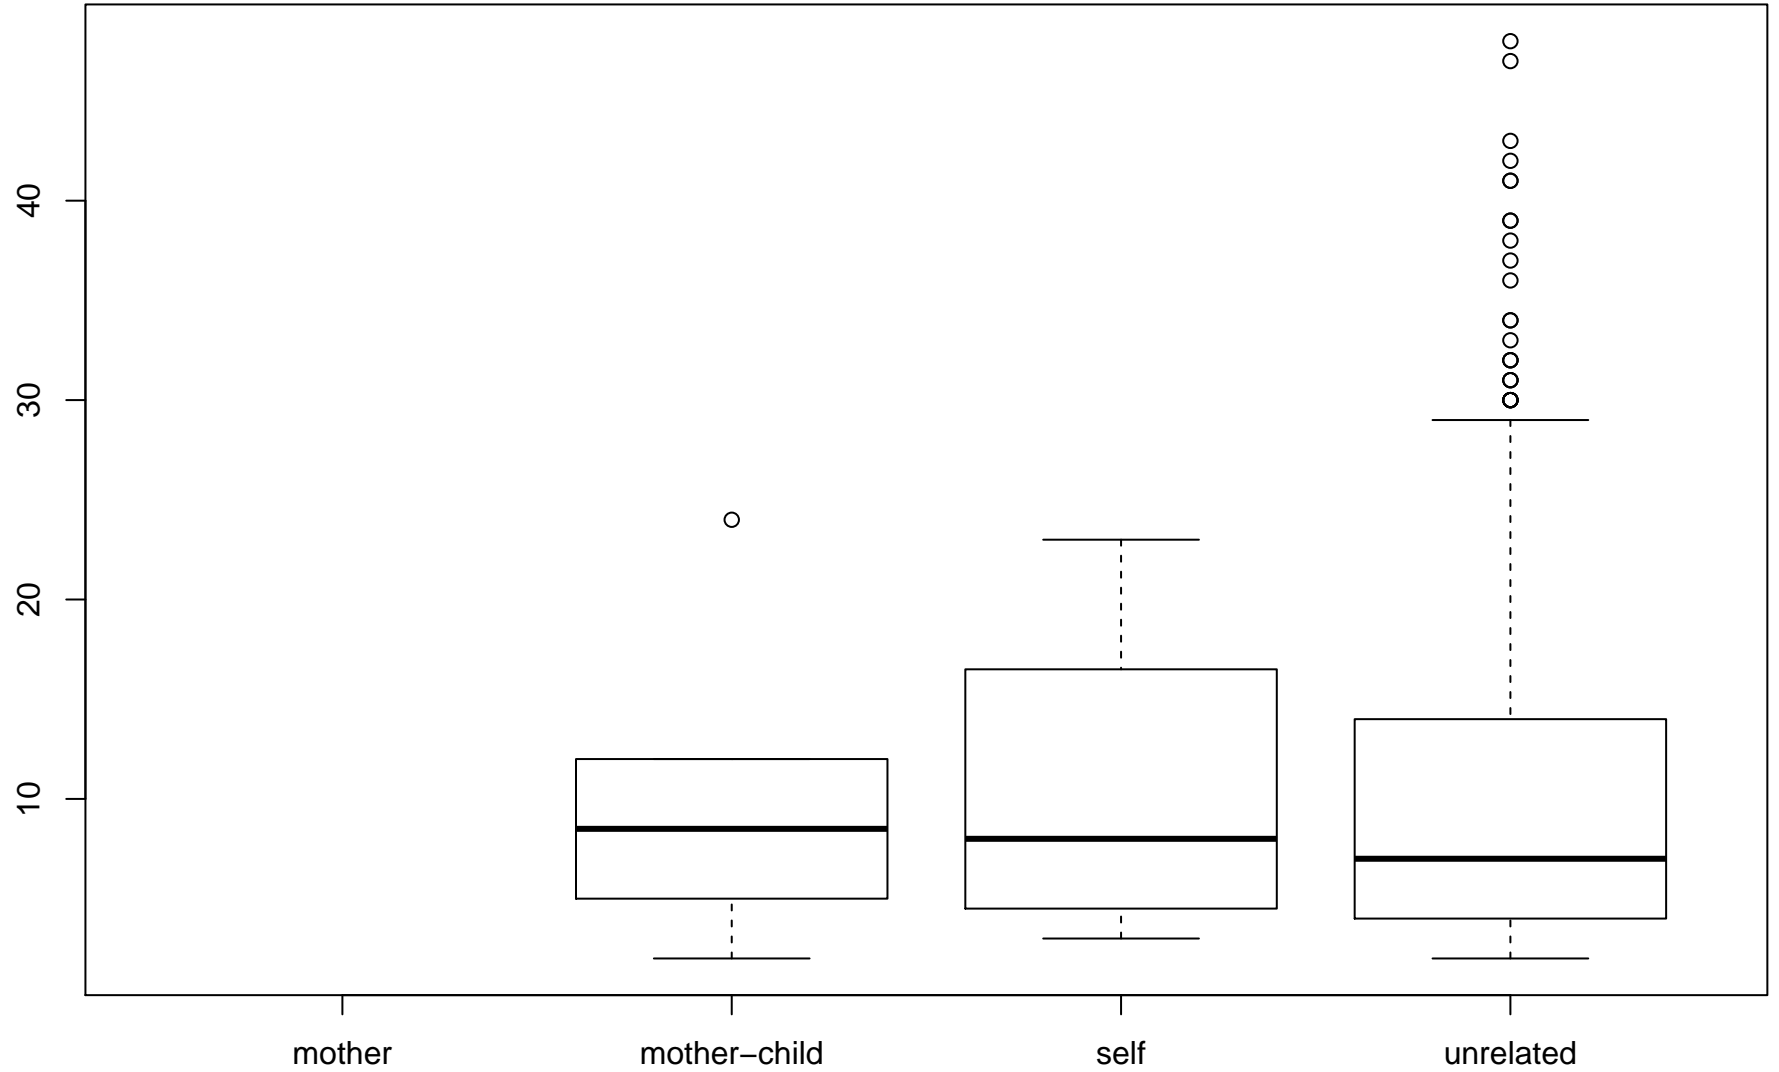

# Coprococcus comes

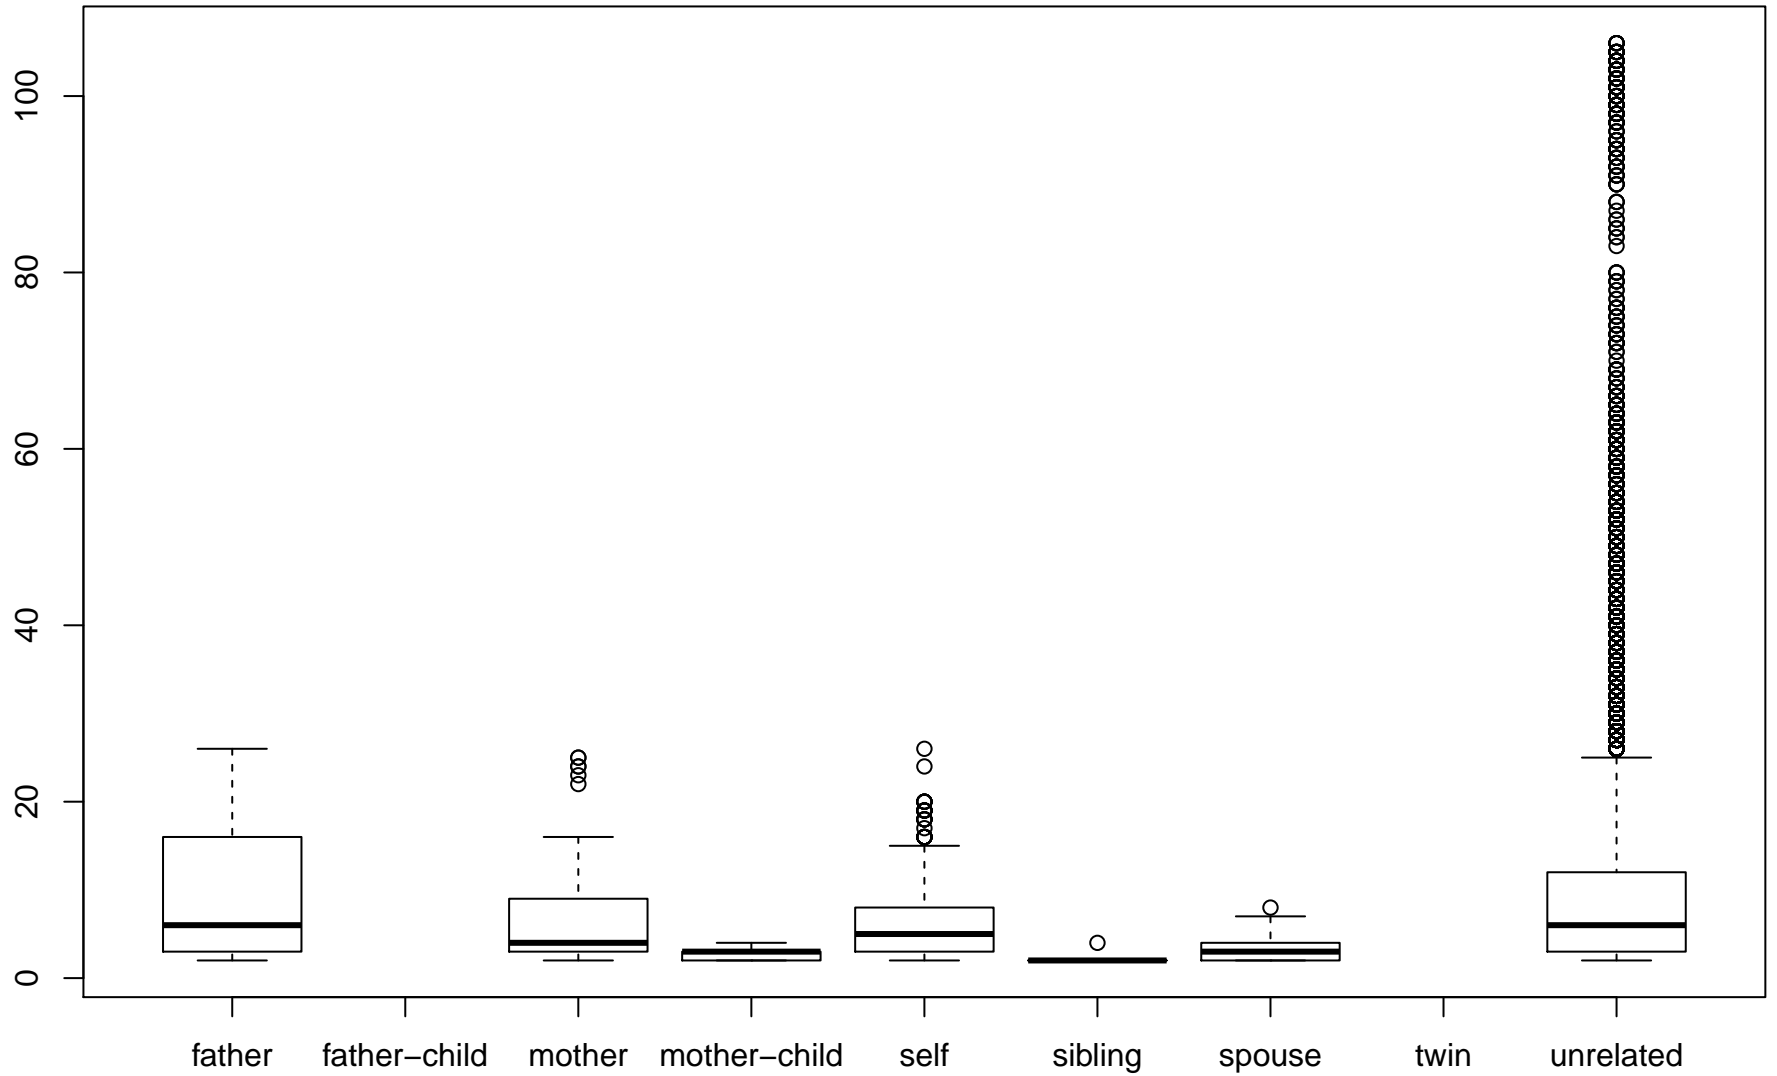

# Ruminococcus lactaris

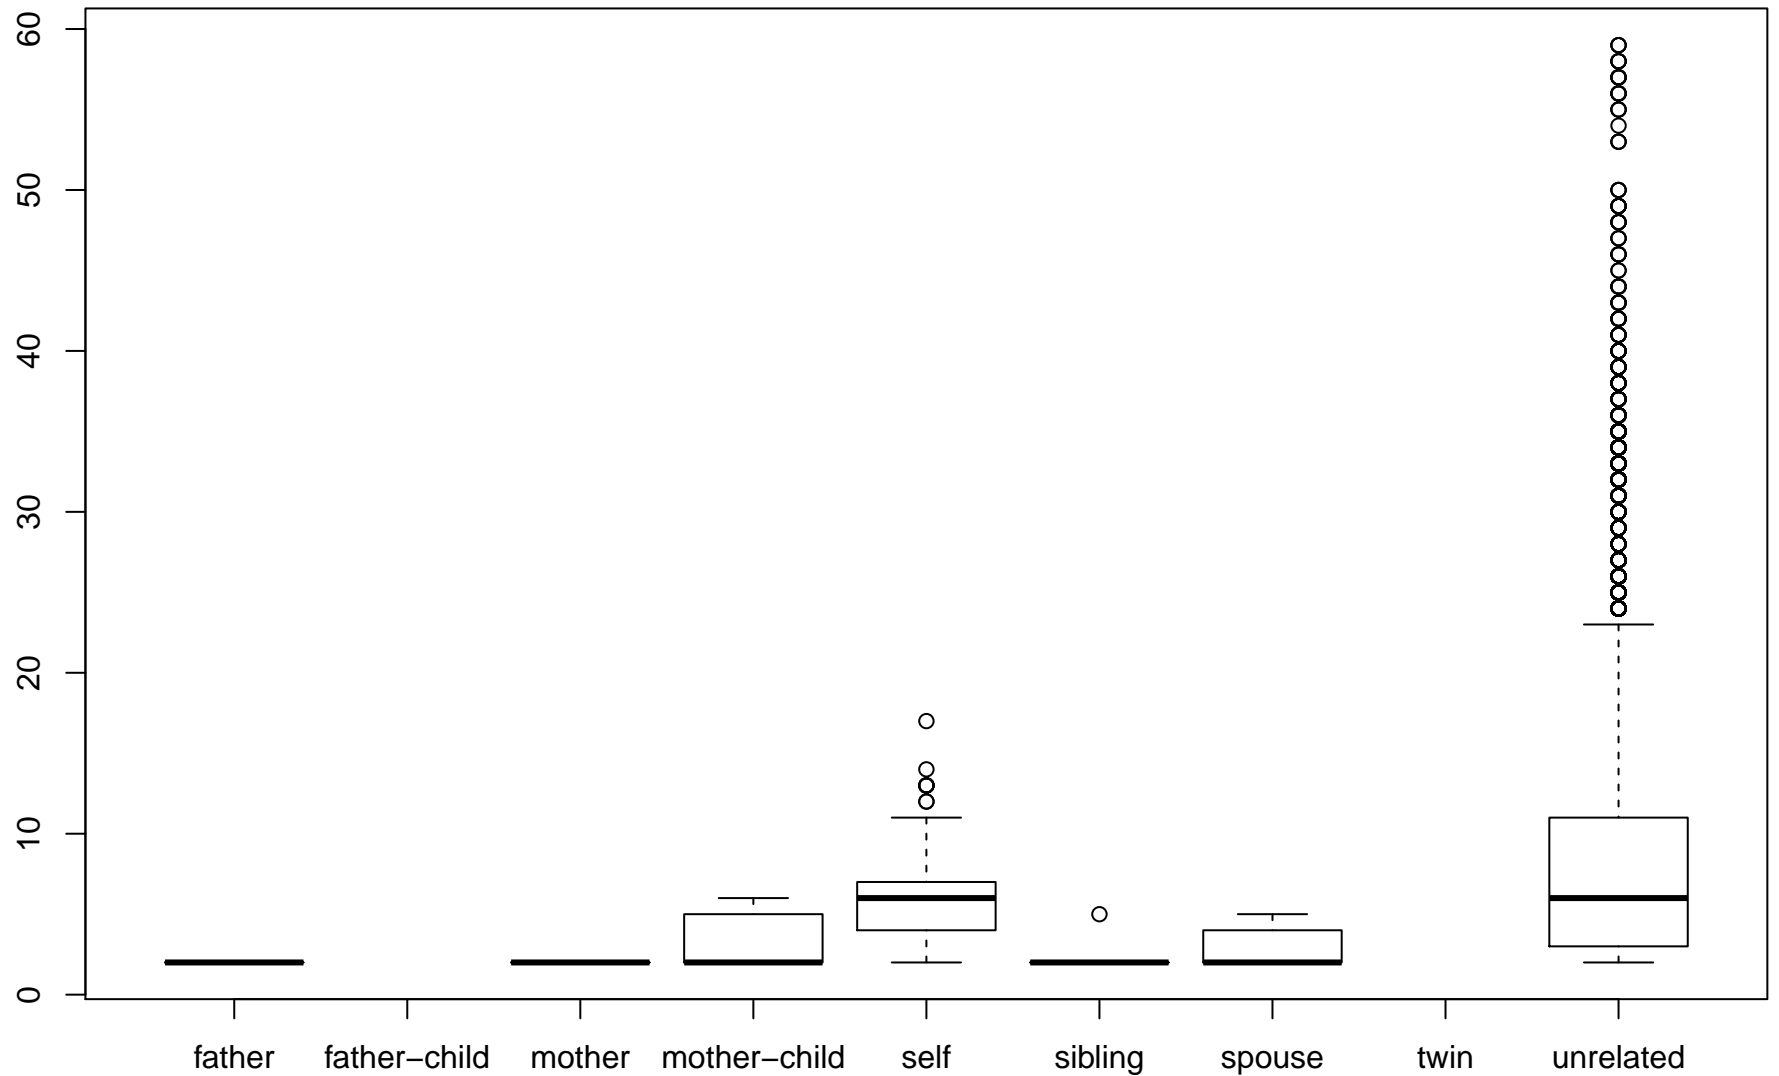

# Blautia hydrogenotrophica

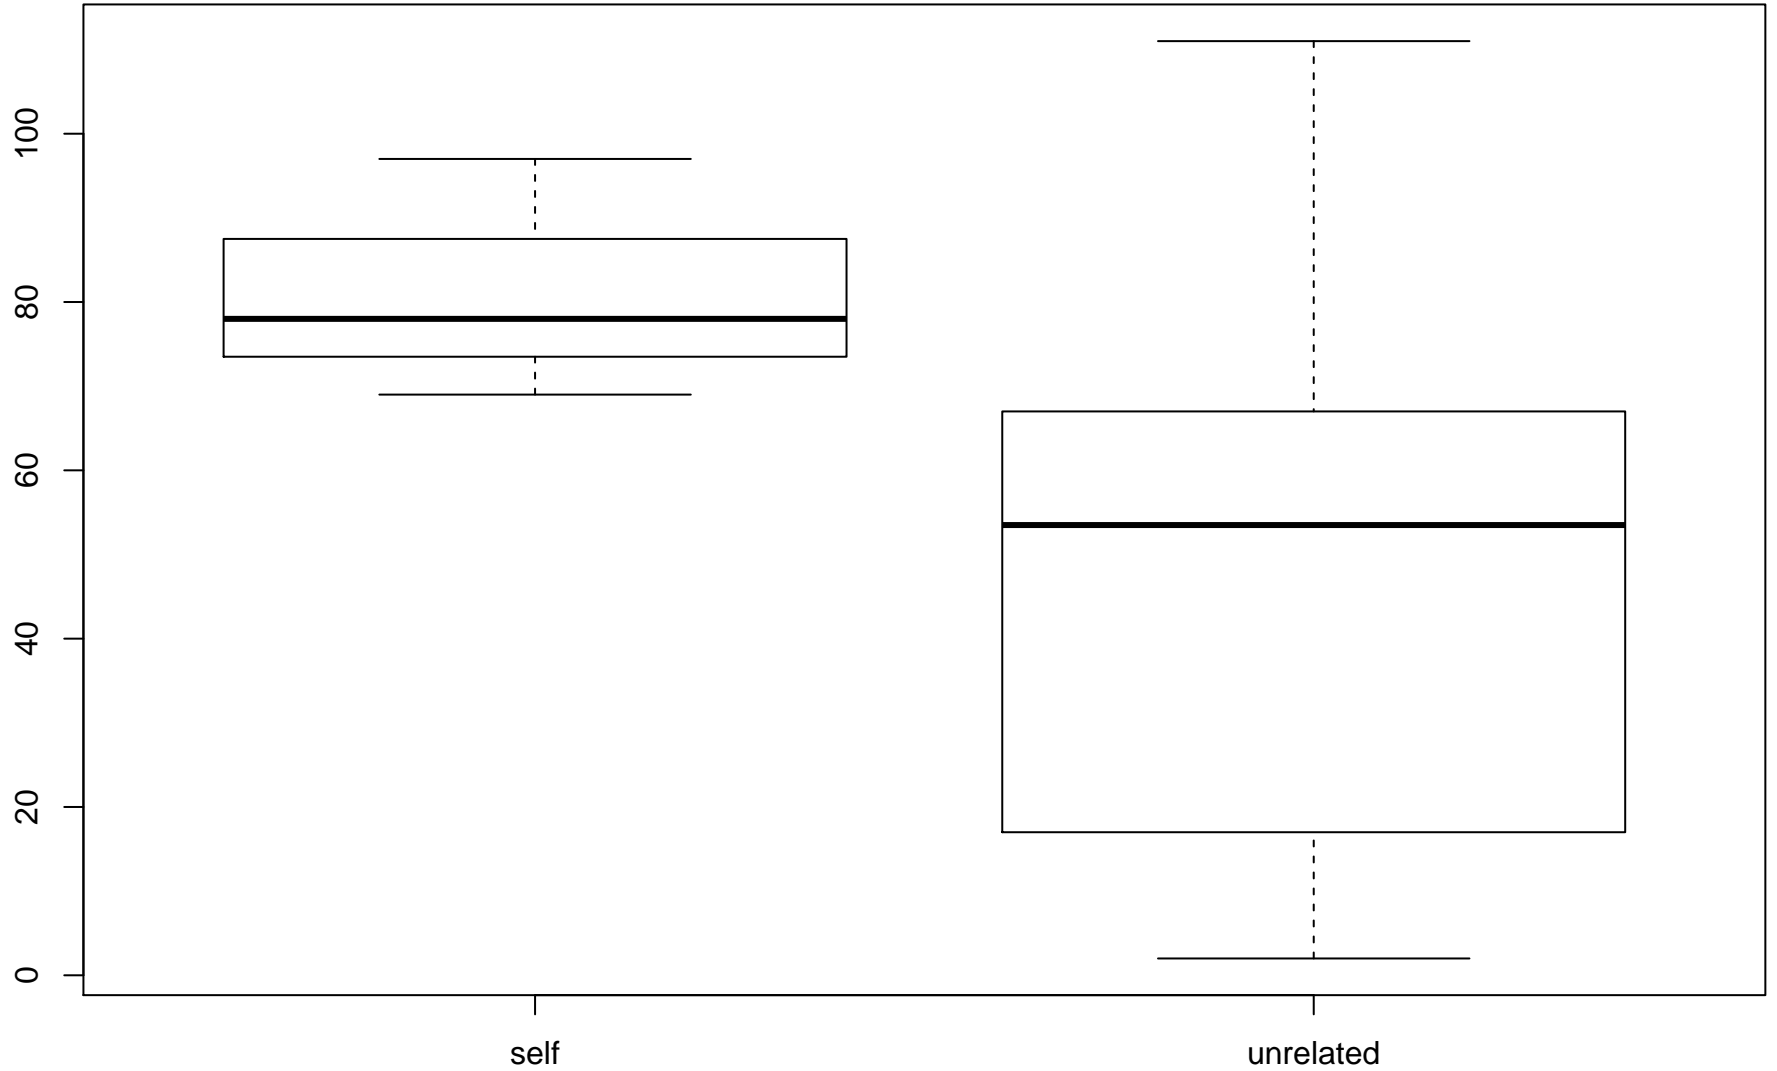

# Veillonella parvula

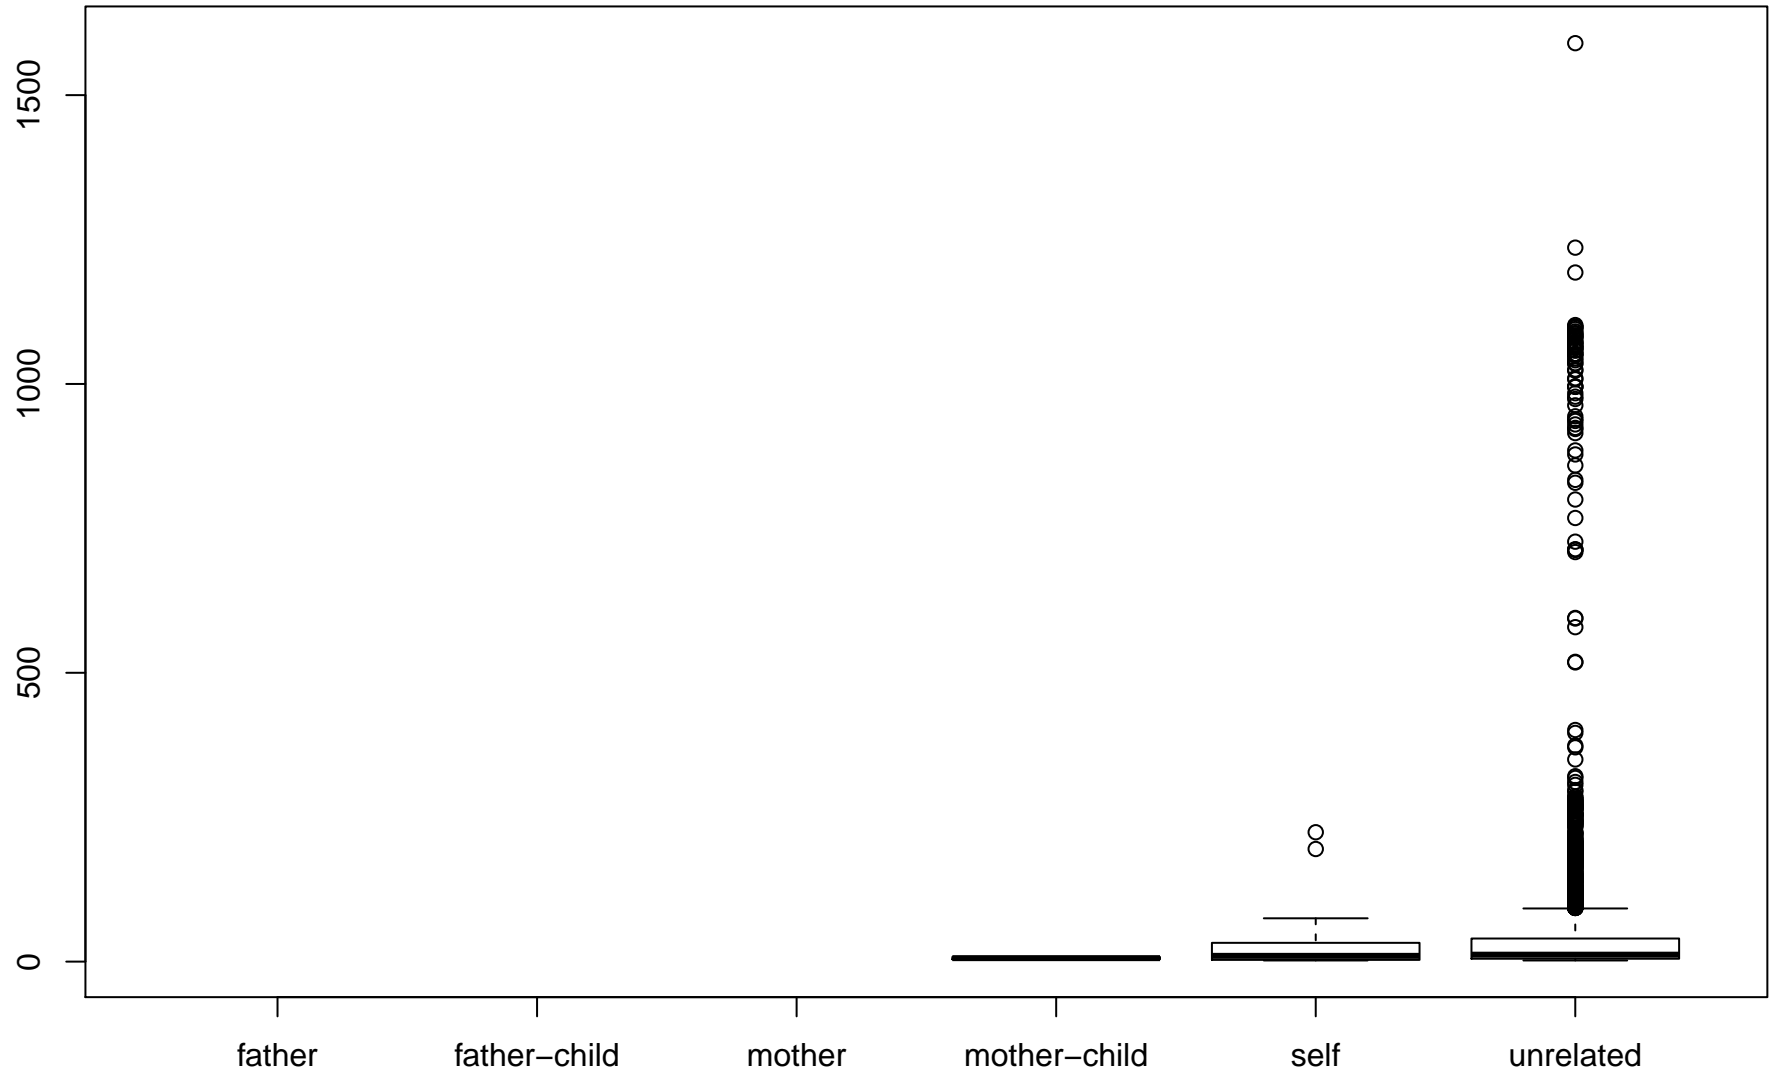

# Eggerthella lenta

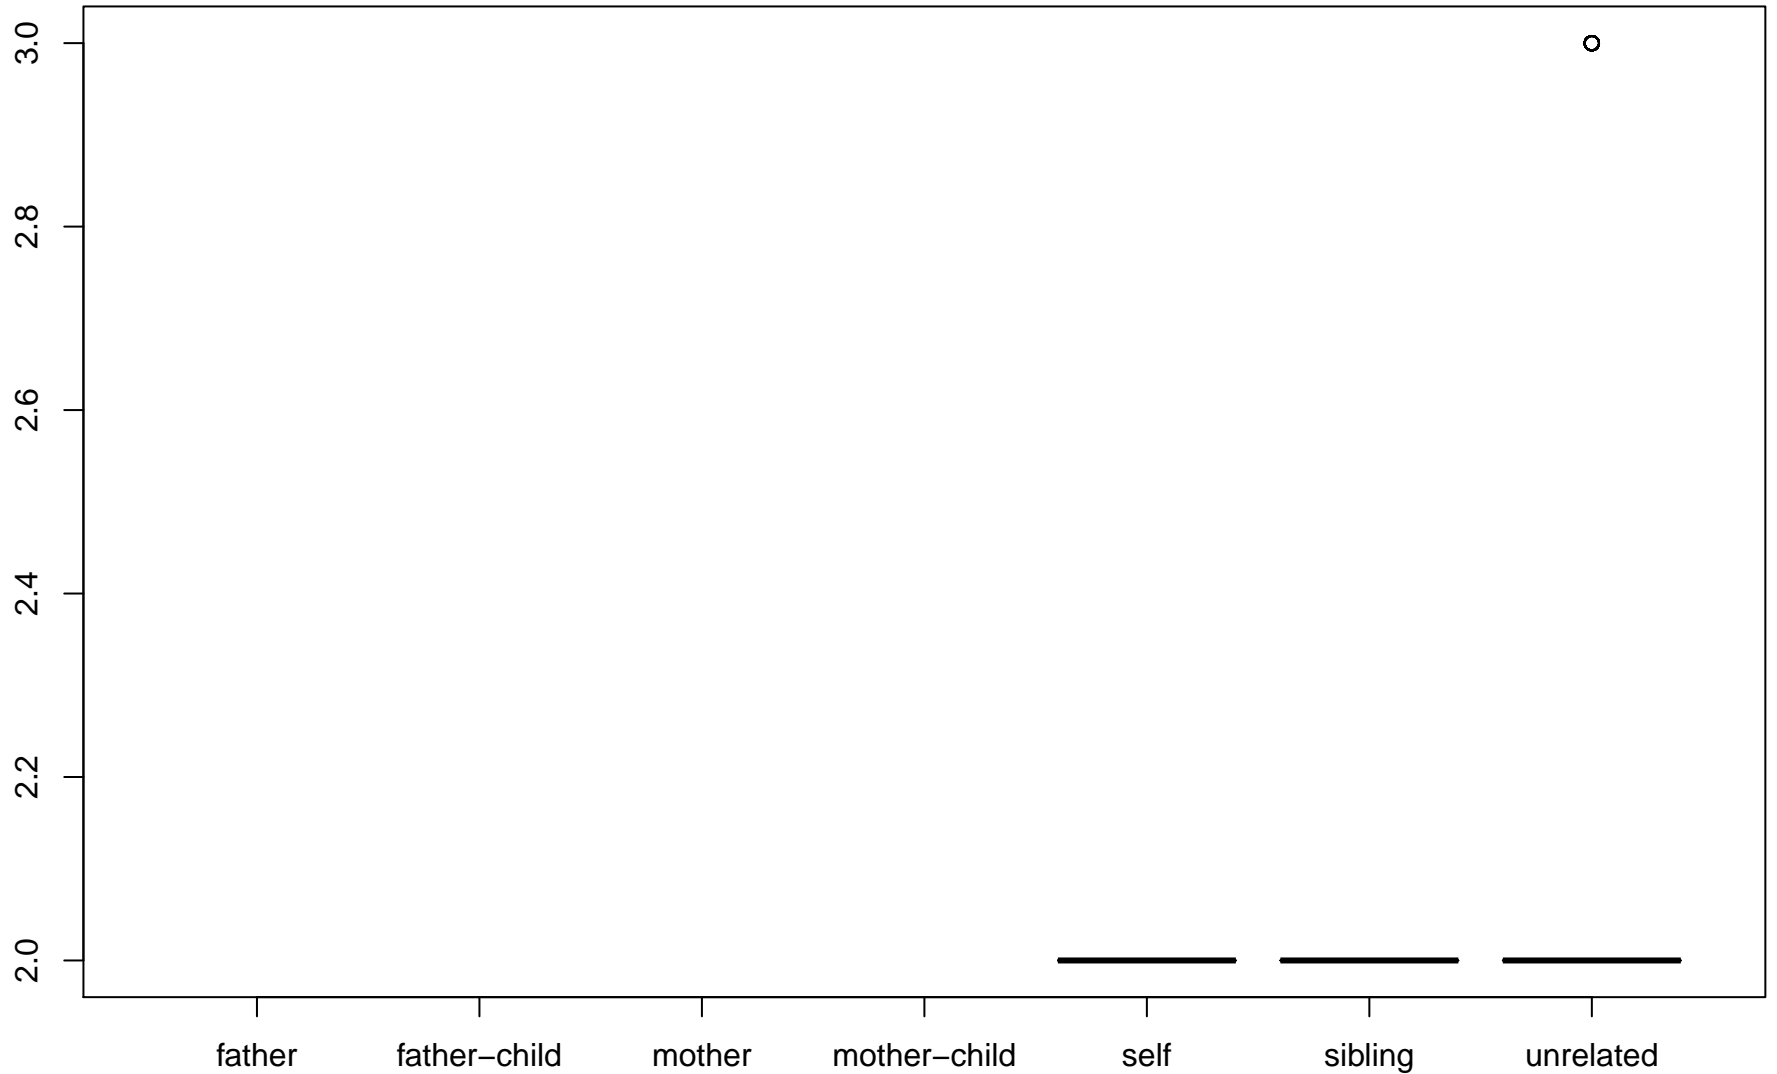



# Butyrivibrio crossotus

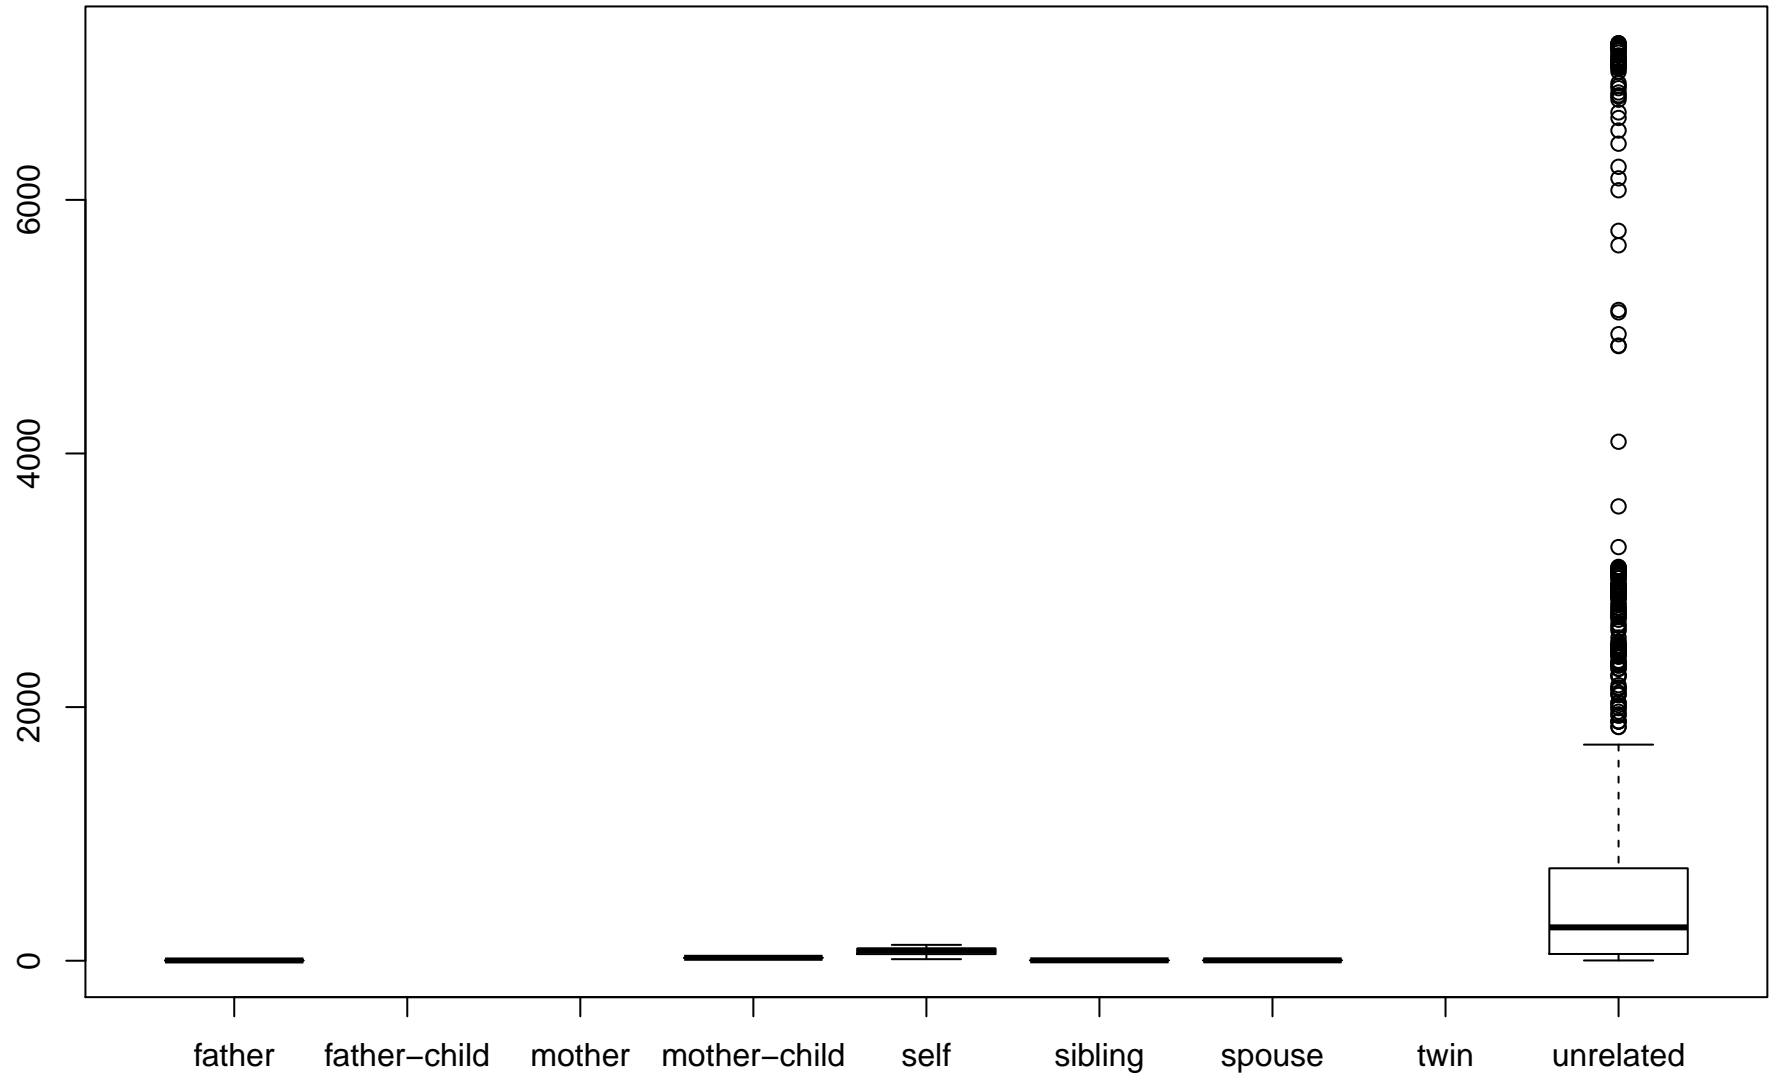

# Eubacterium eligens

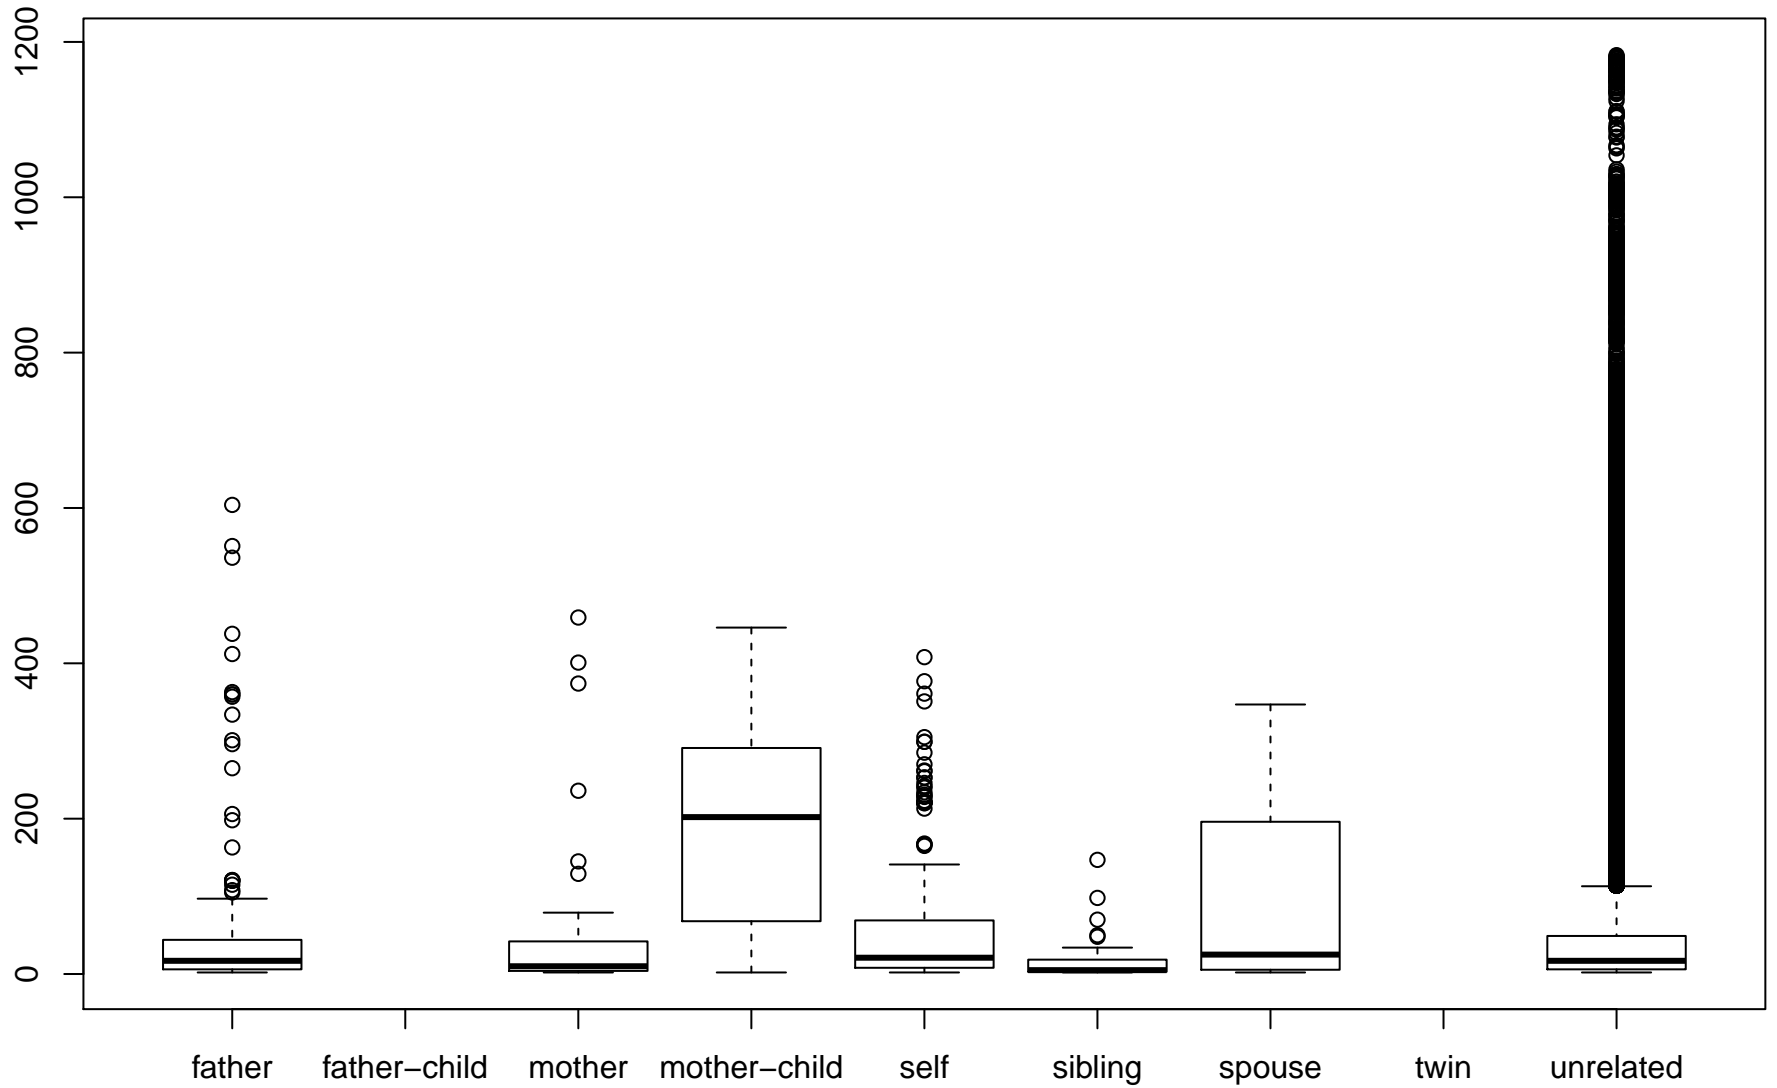

# Bifidobacterium angulatum

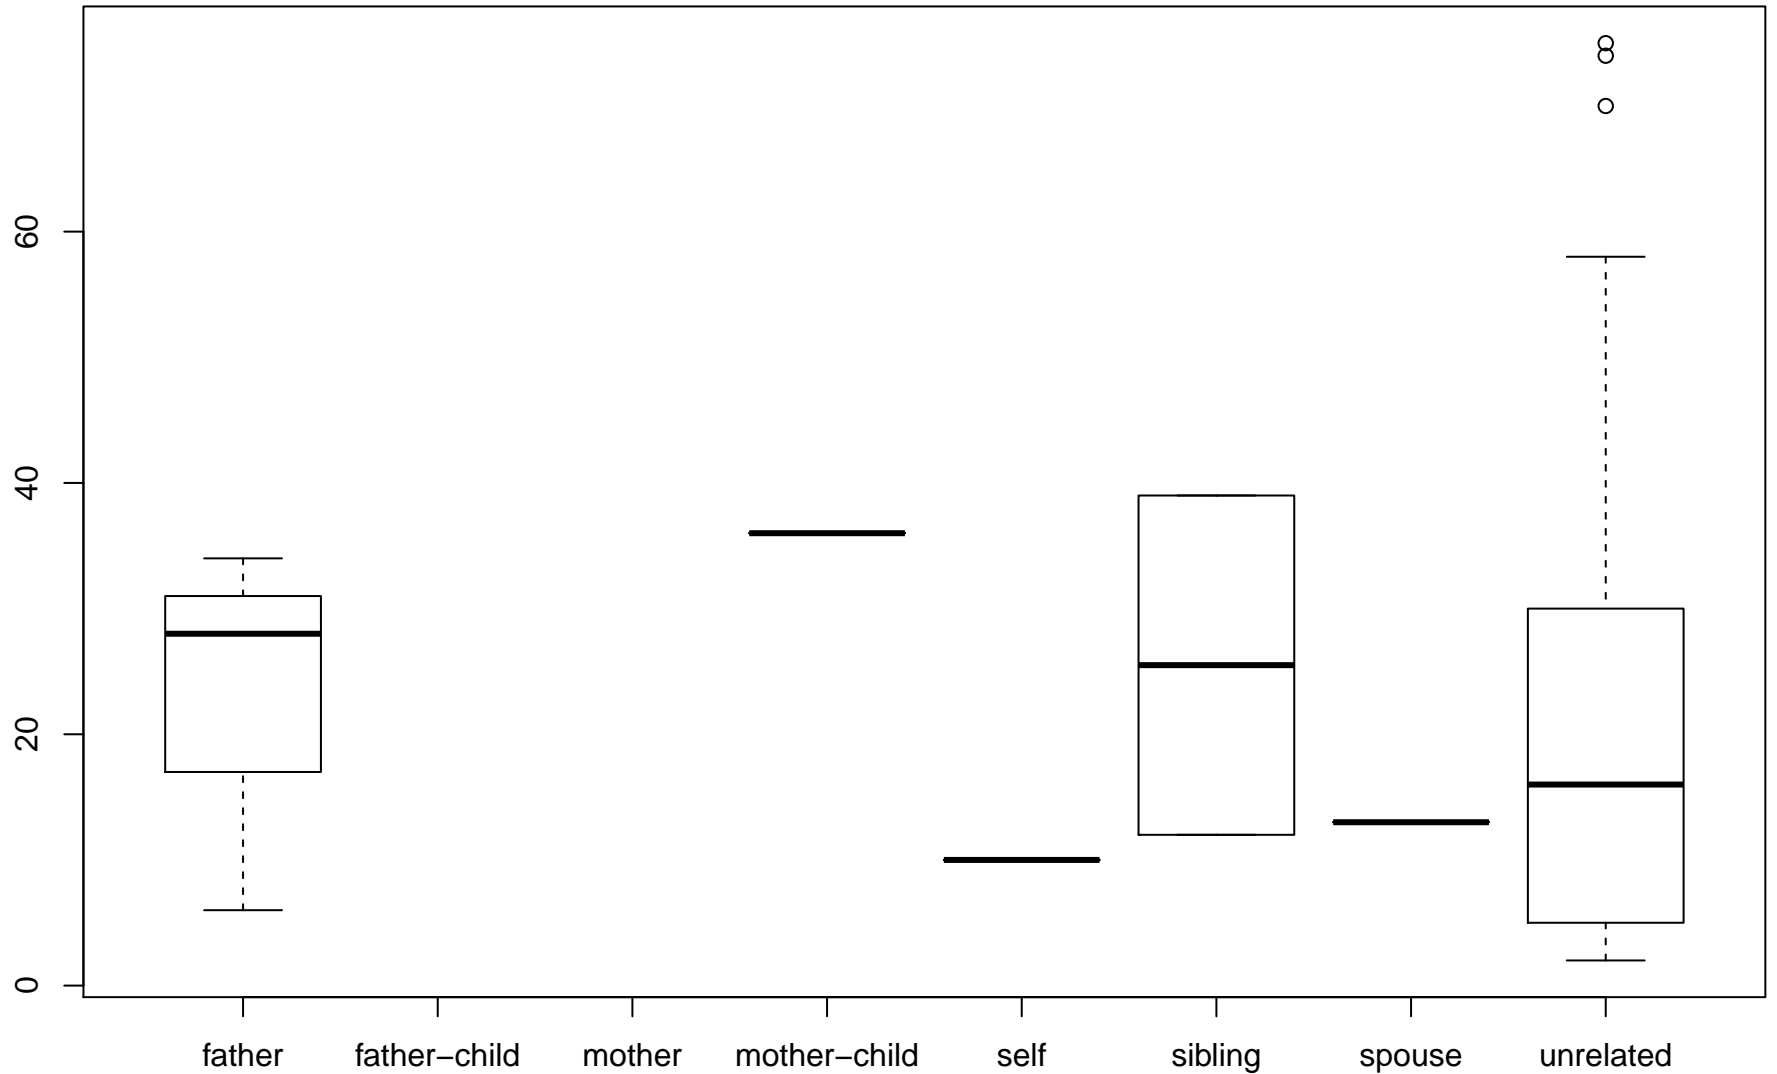

# Collinsella intestinalis

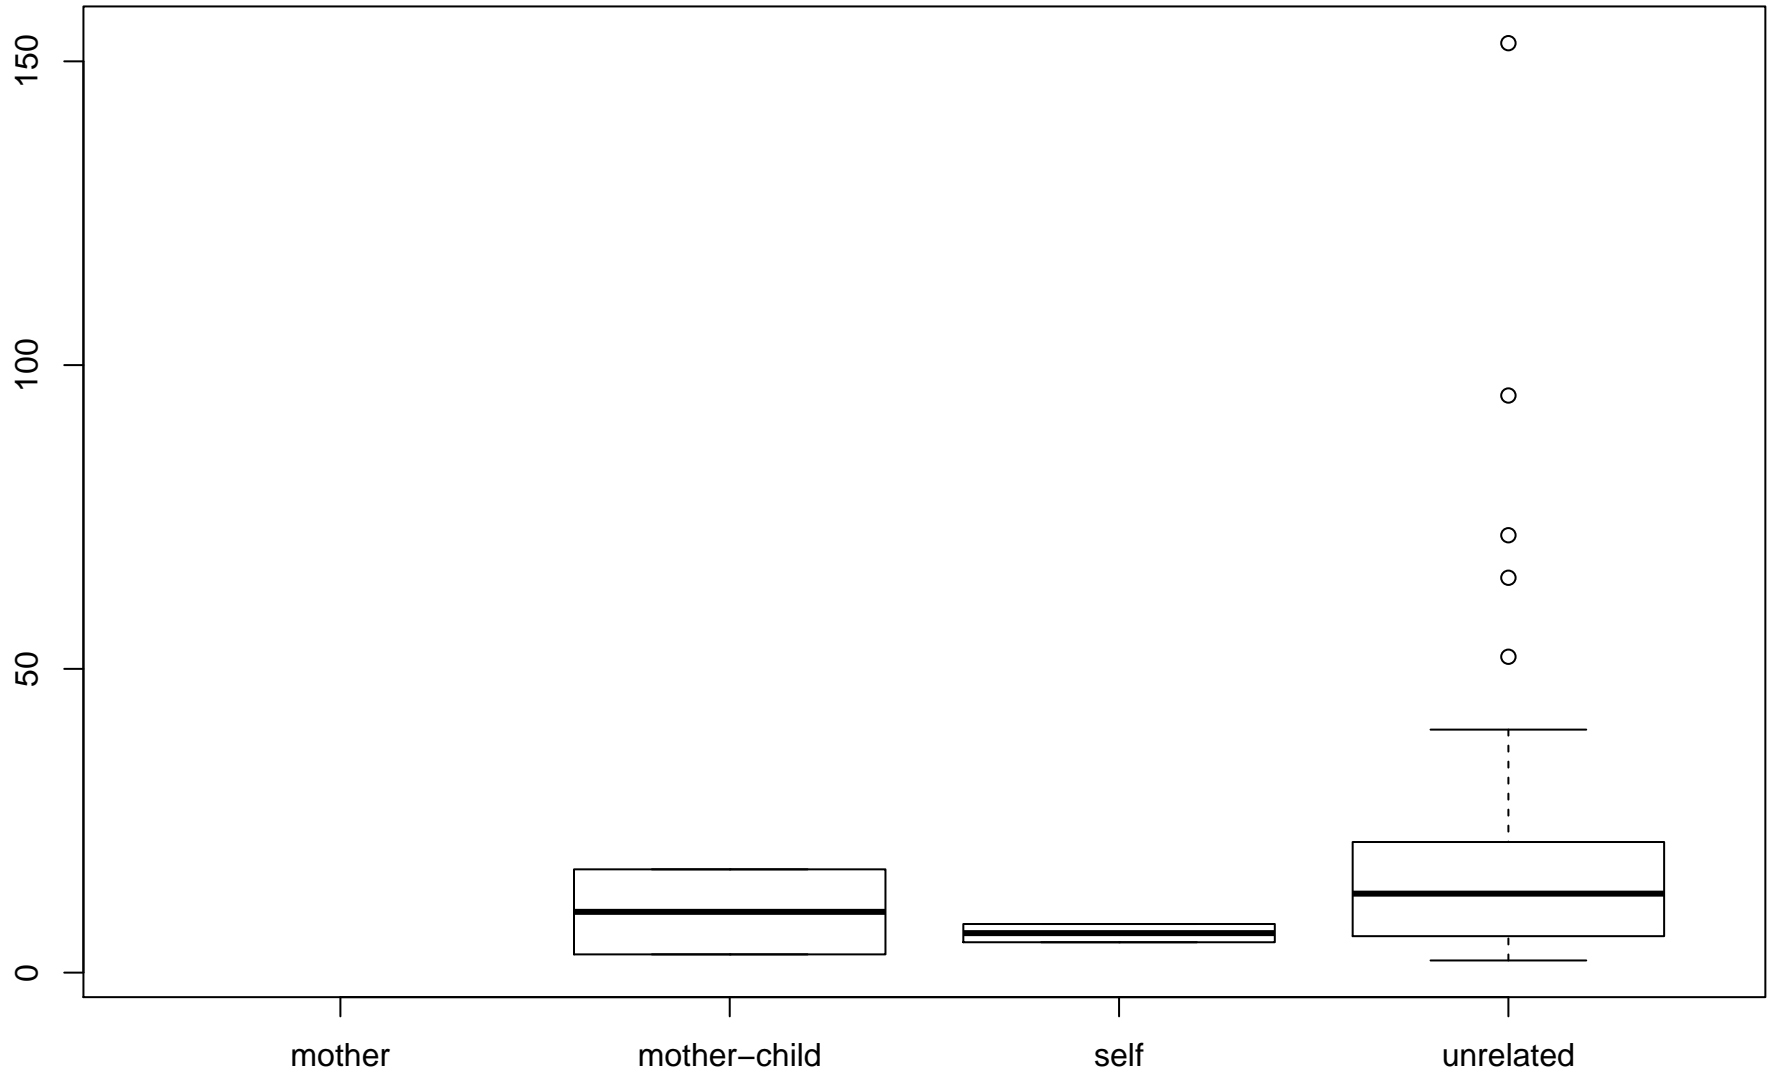

# Actinomyces urogenitalis

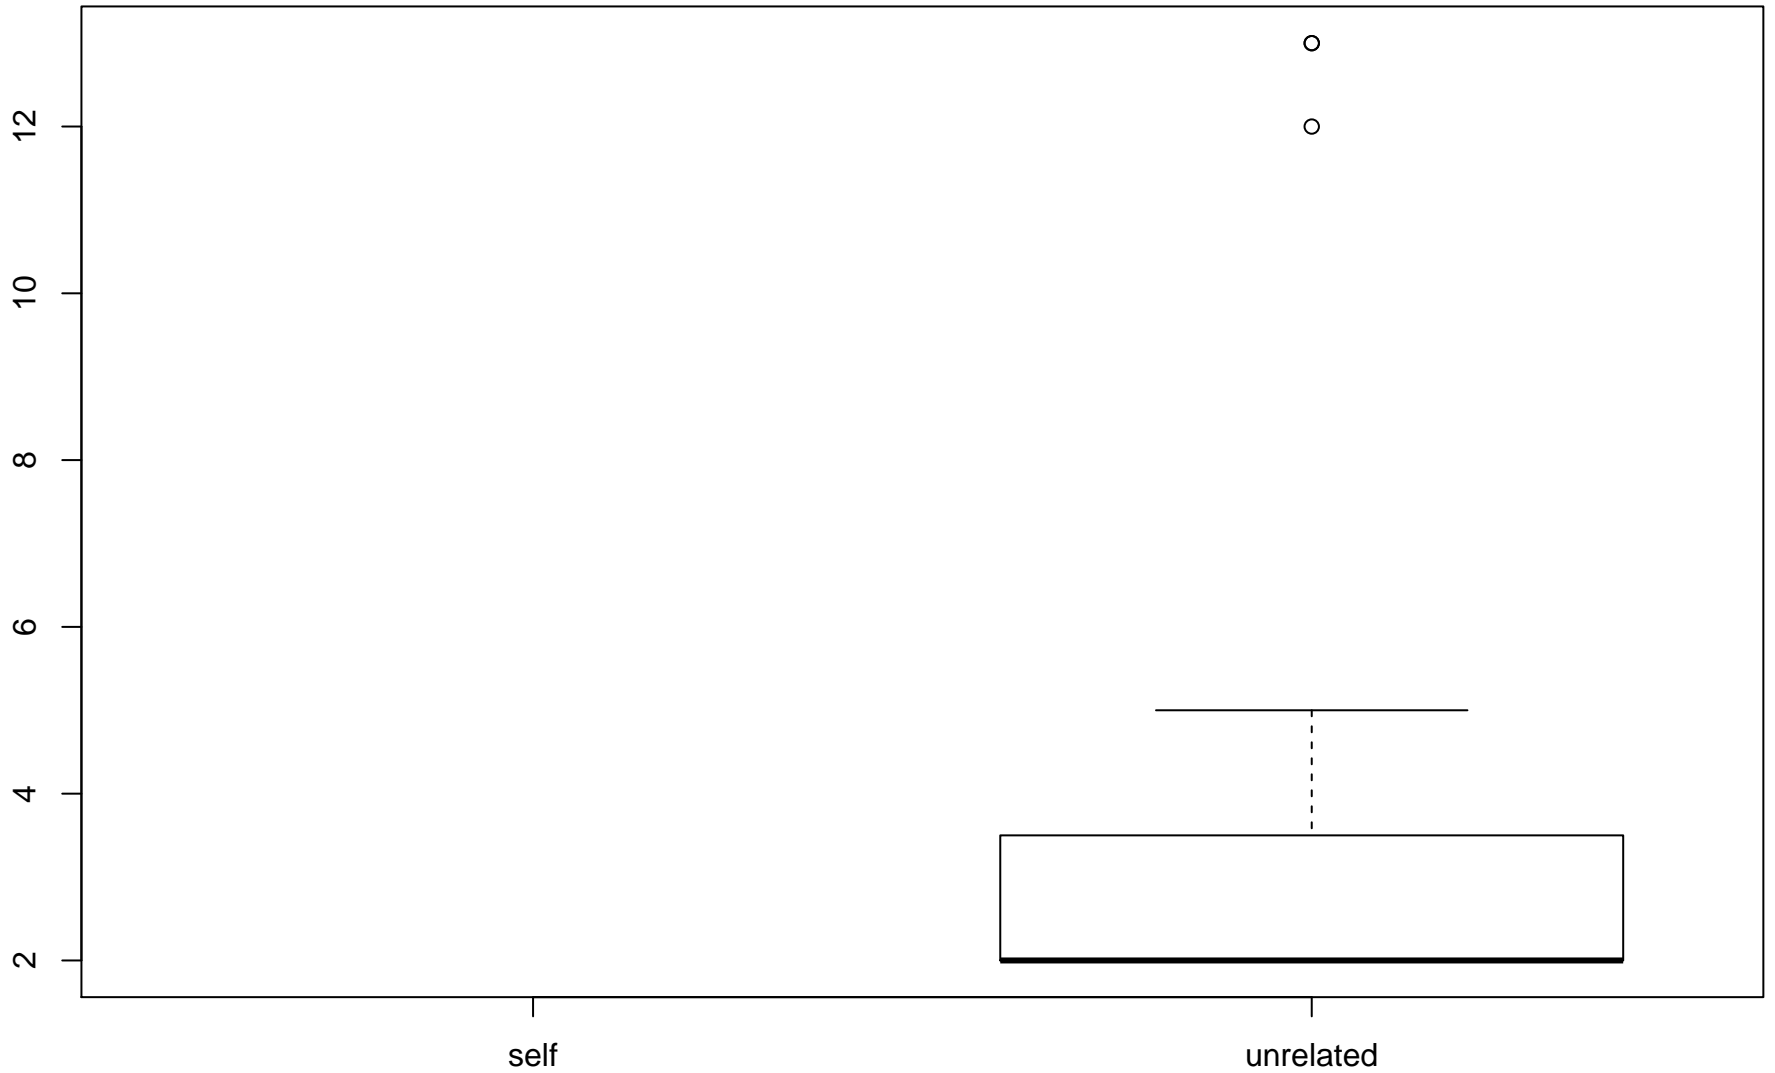

**Blautia hansenii**

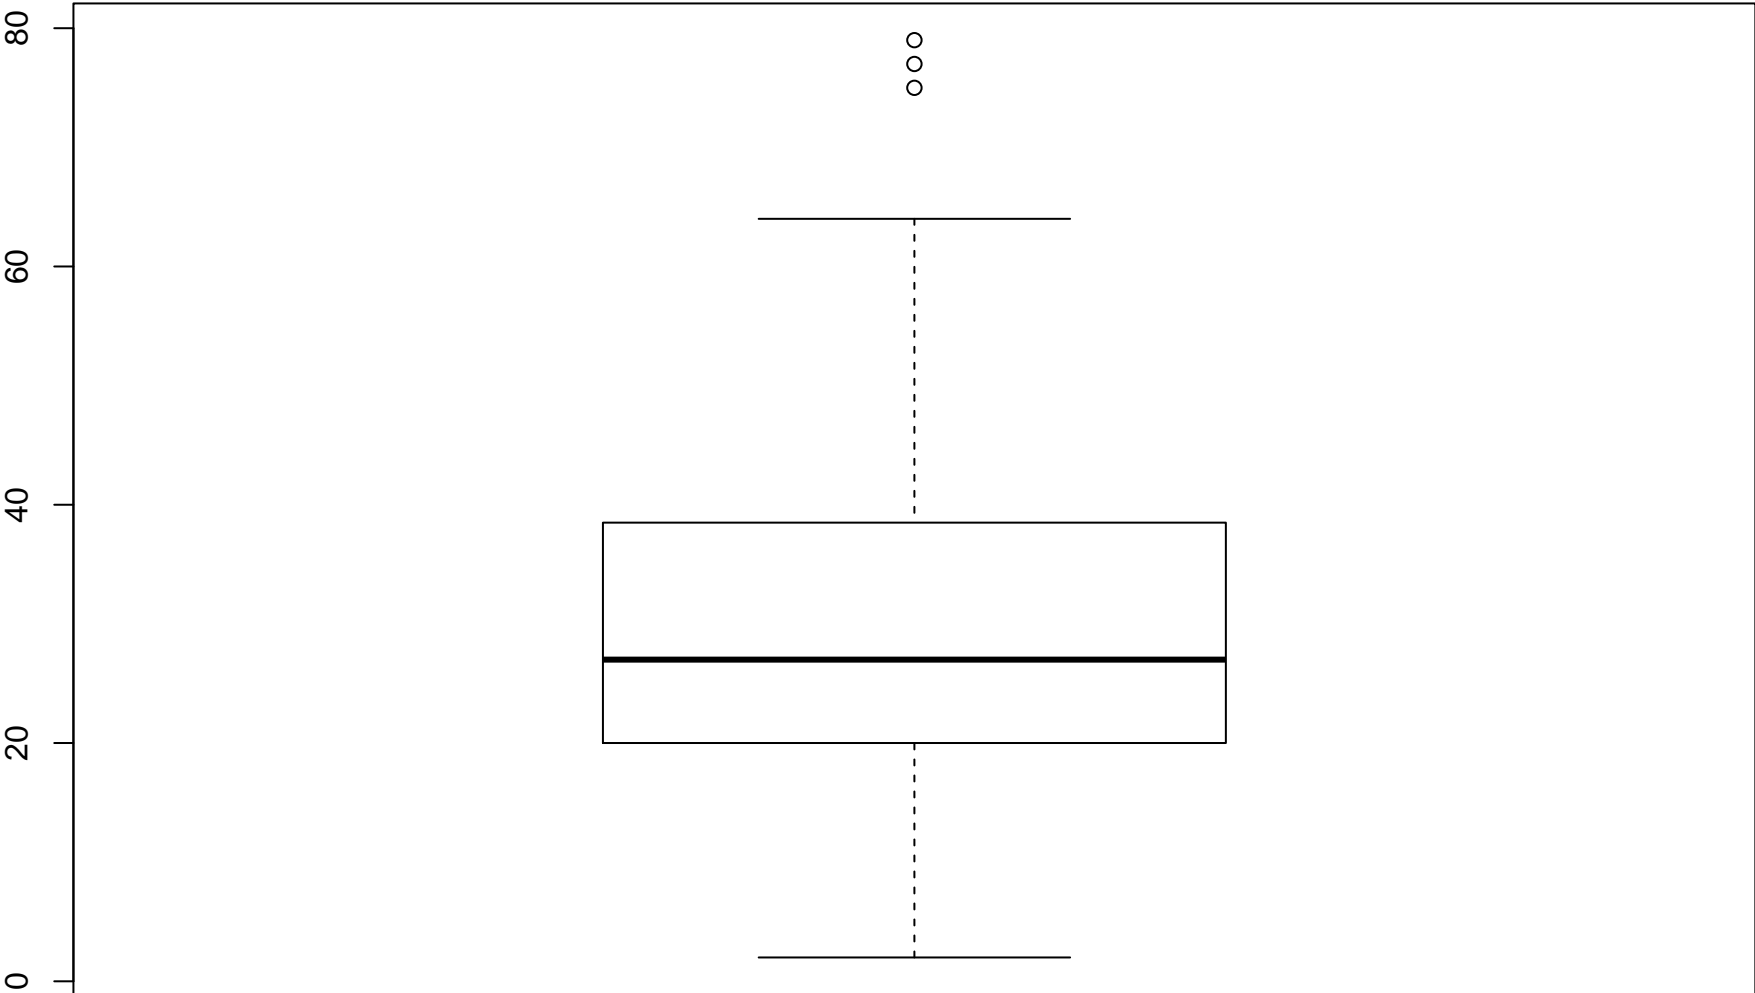

# Veillonella dispar

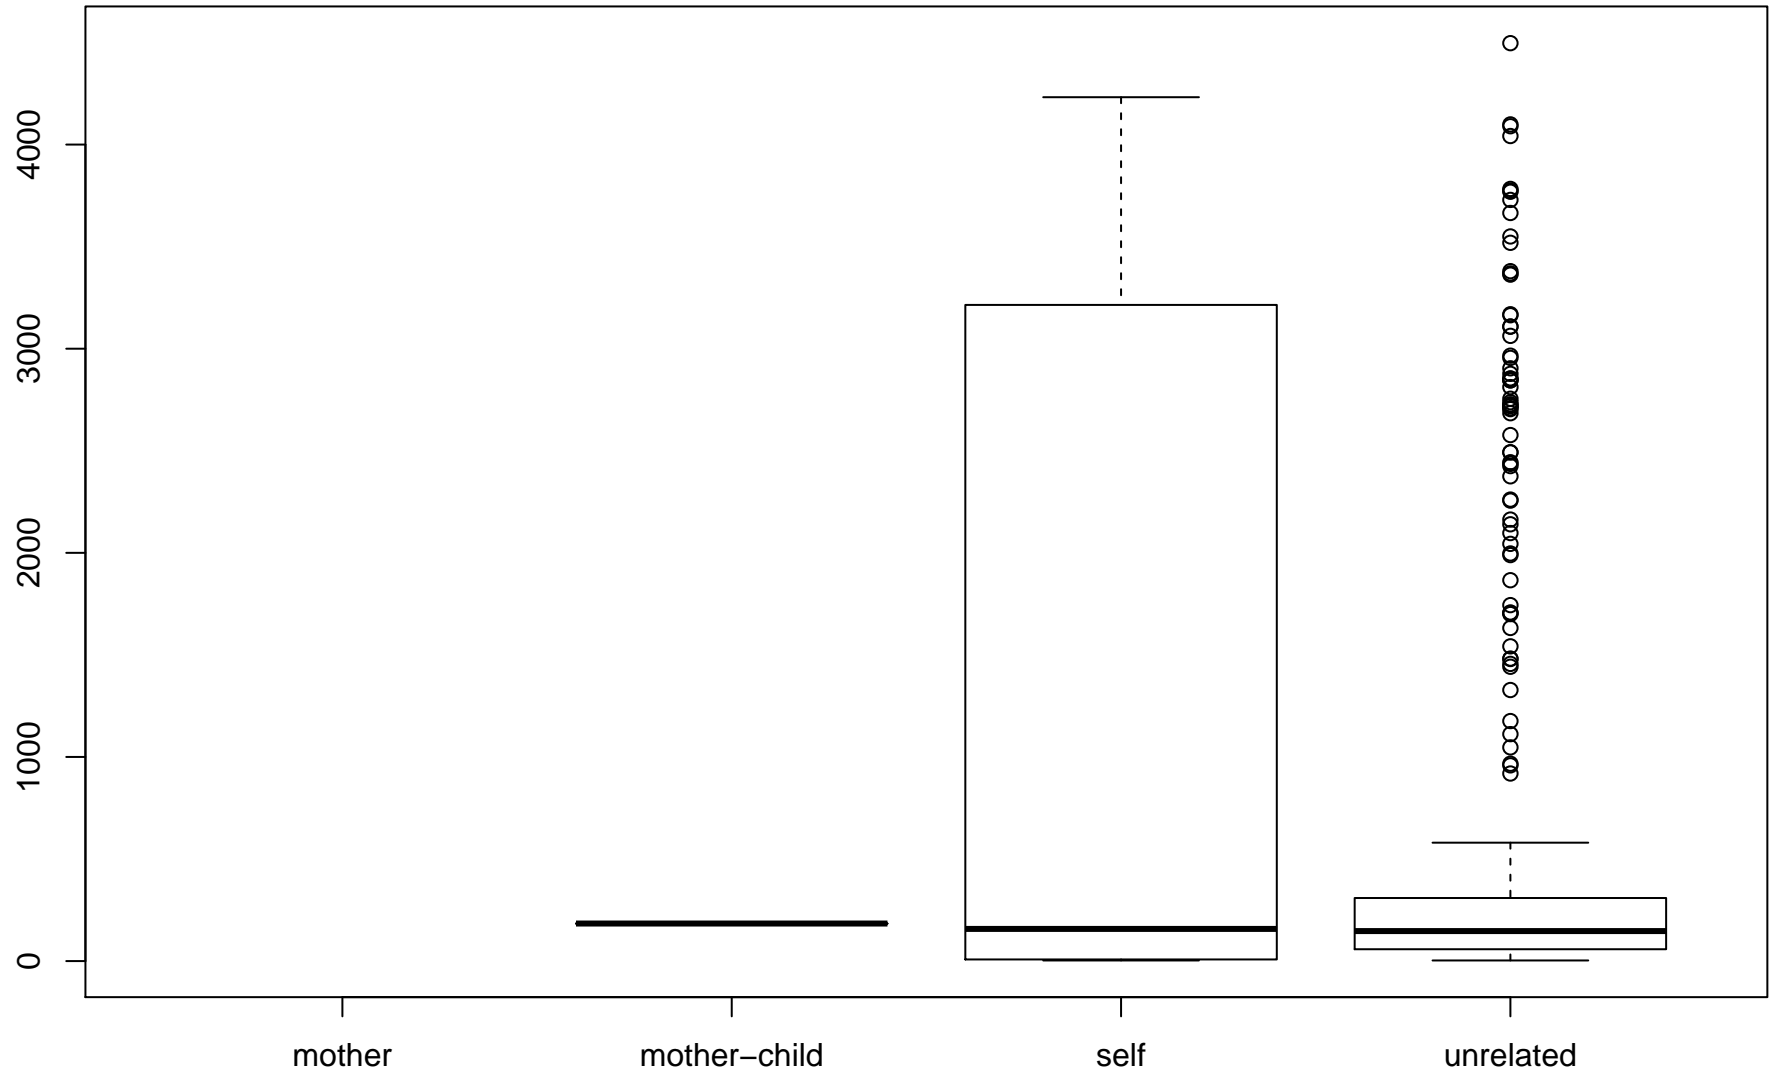

# Bifidobacterium pseudocatenulatum

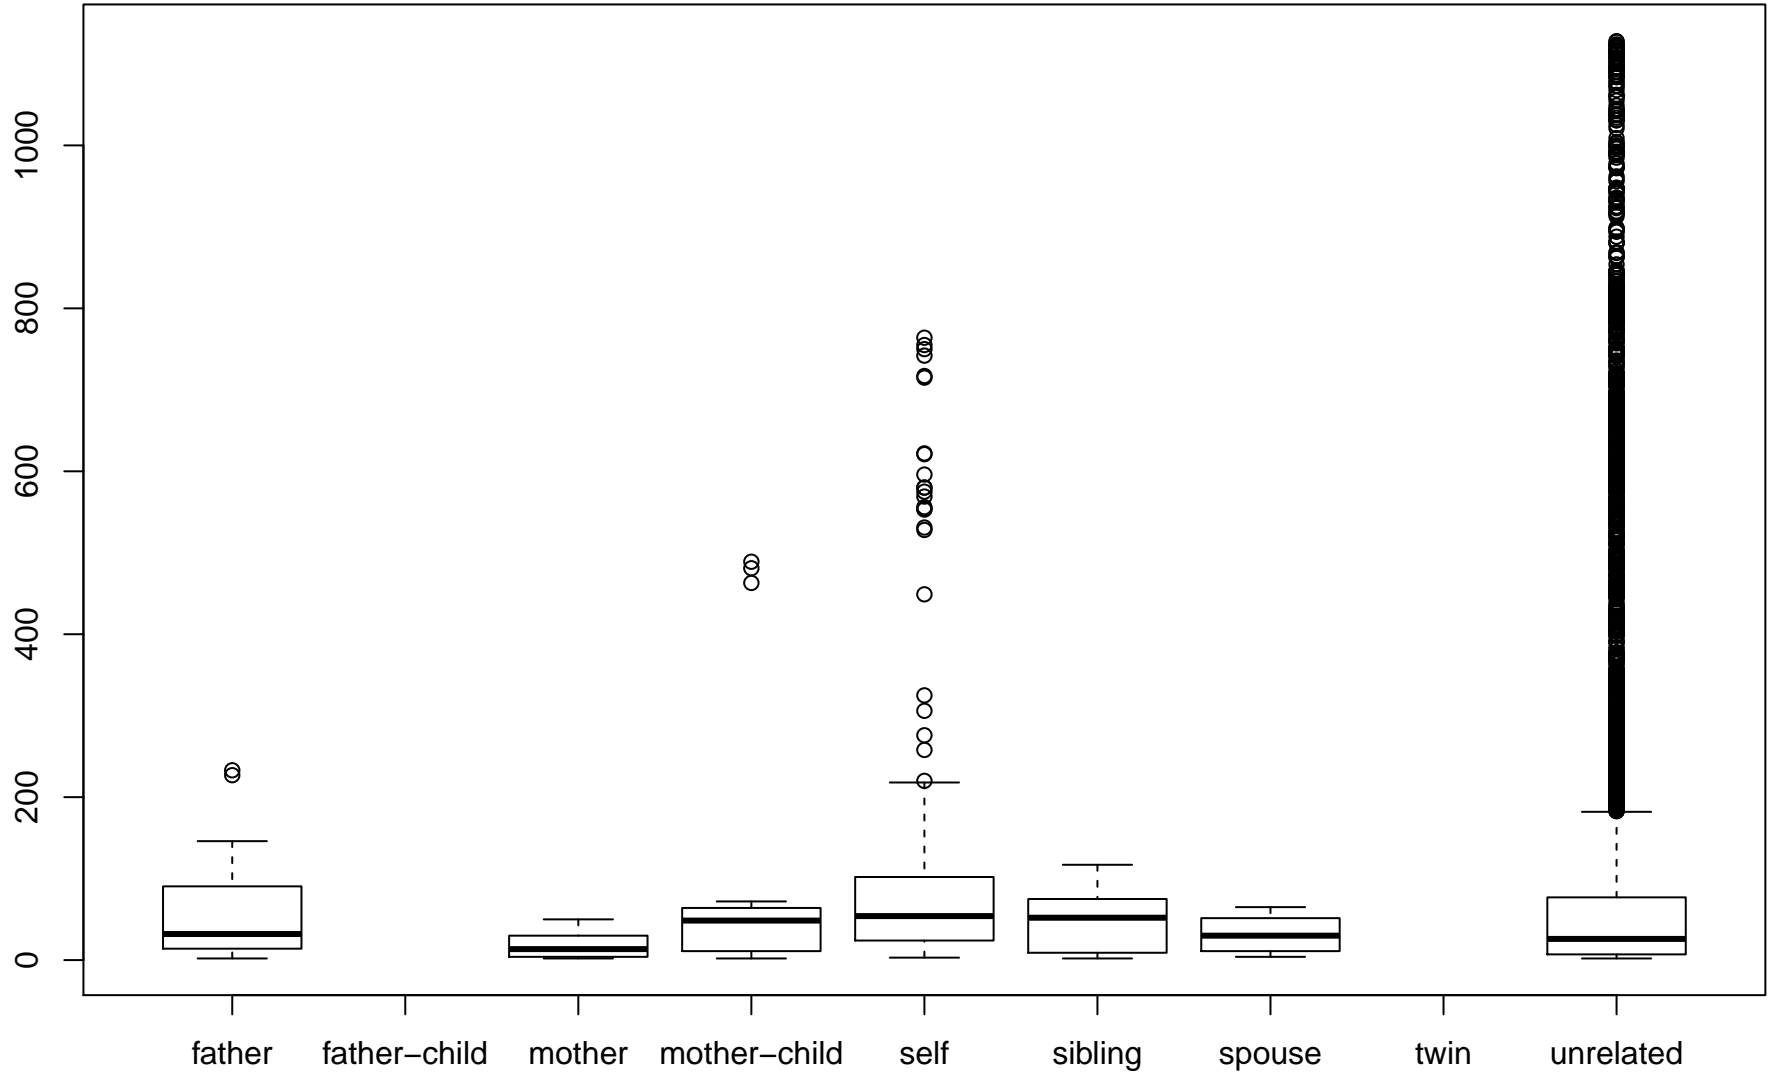



# Erysipelotrichaceae bacterium

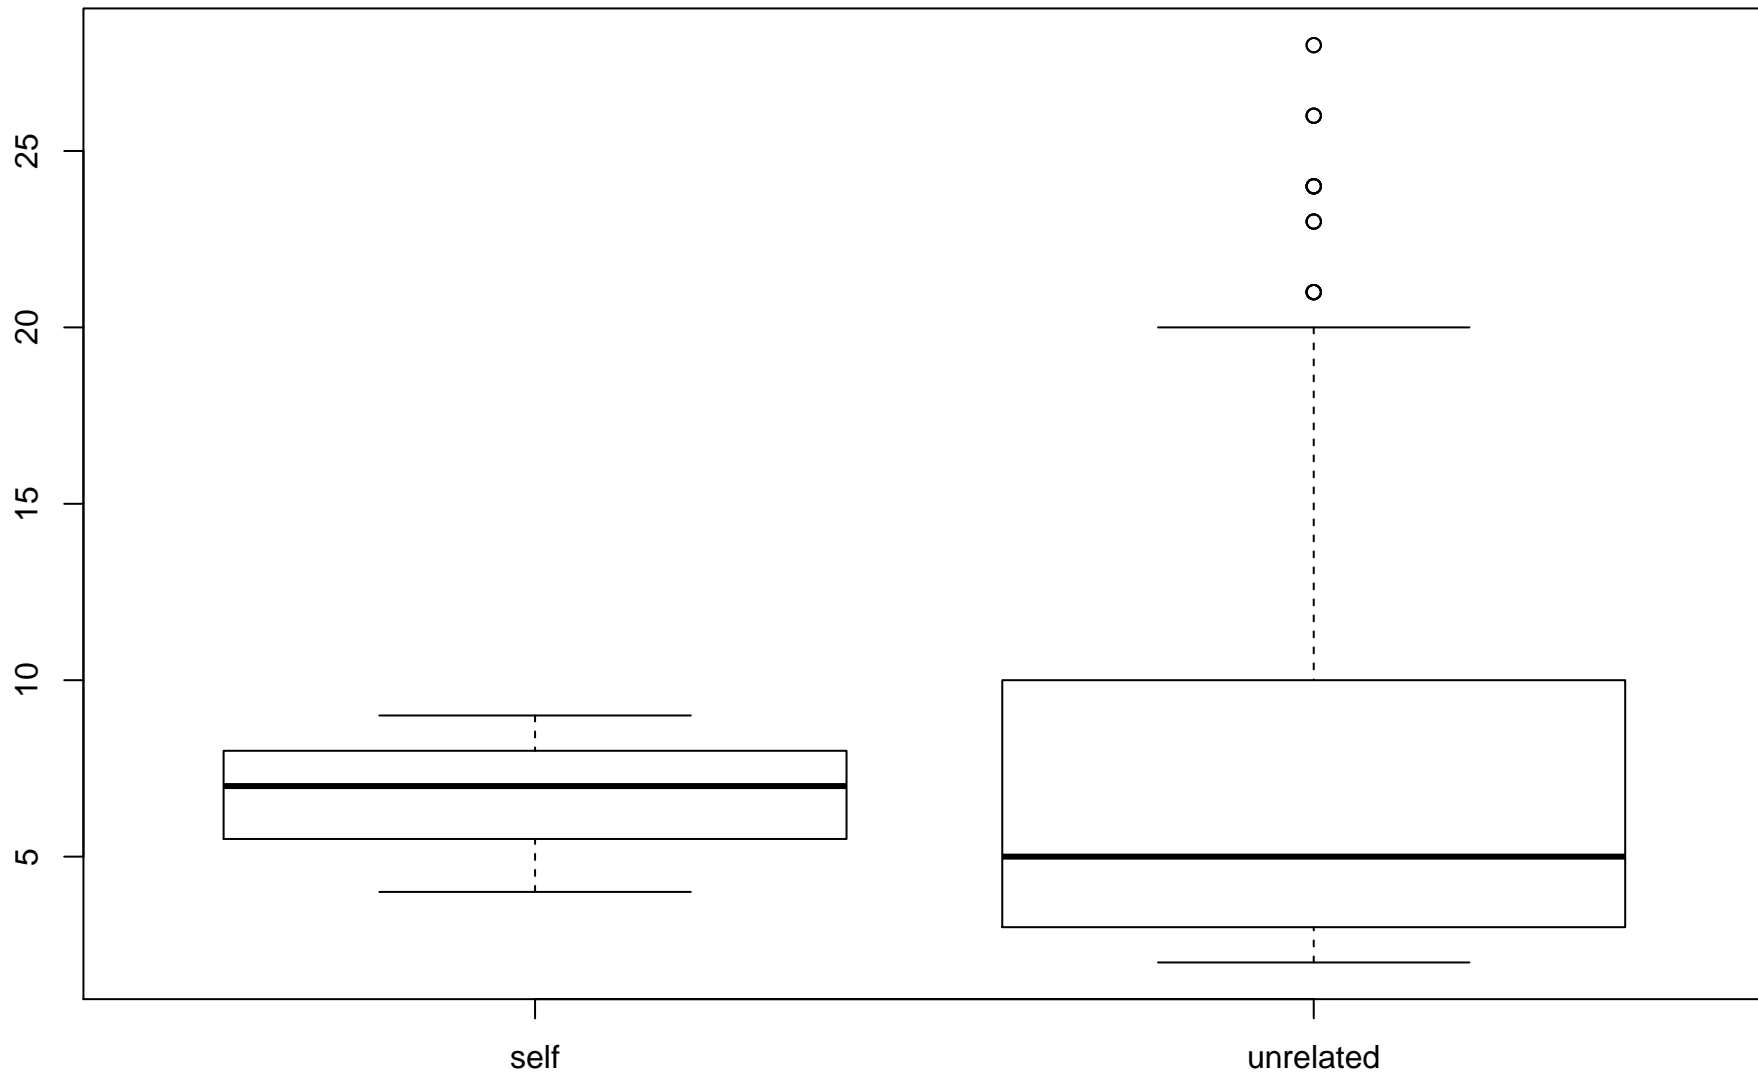

# Ruminococcaceae bacterium

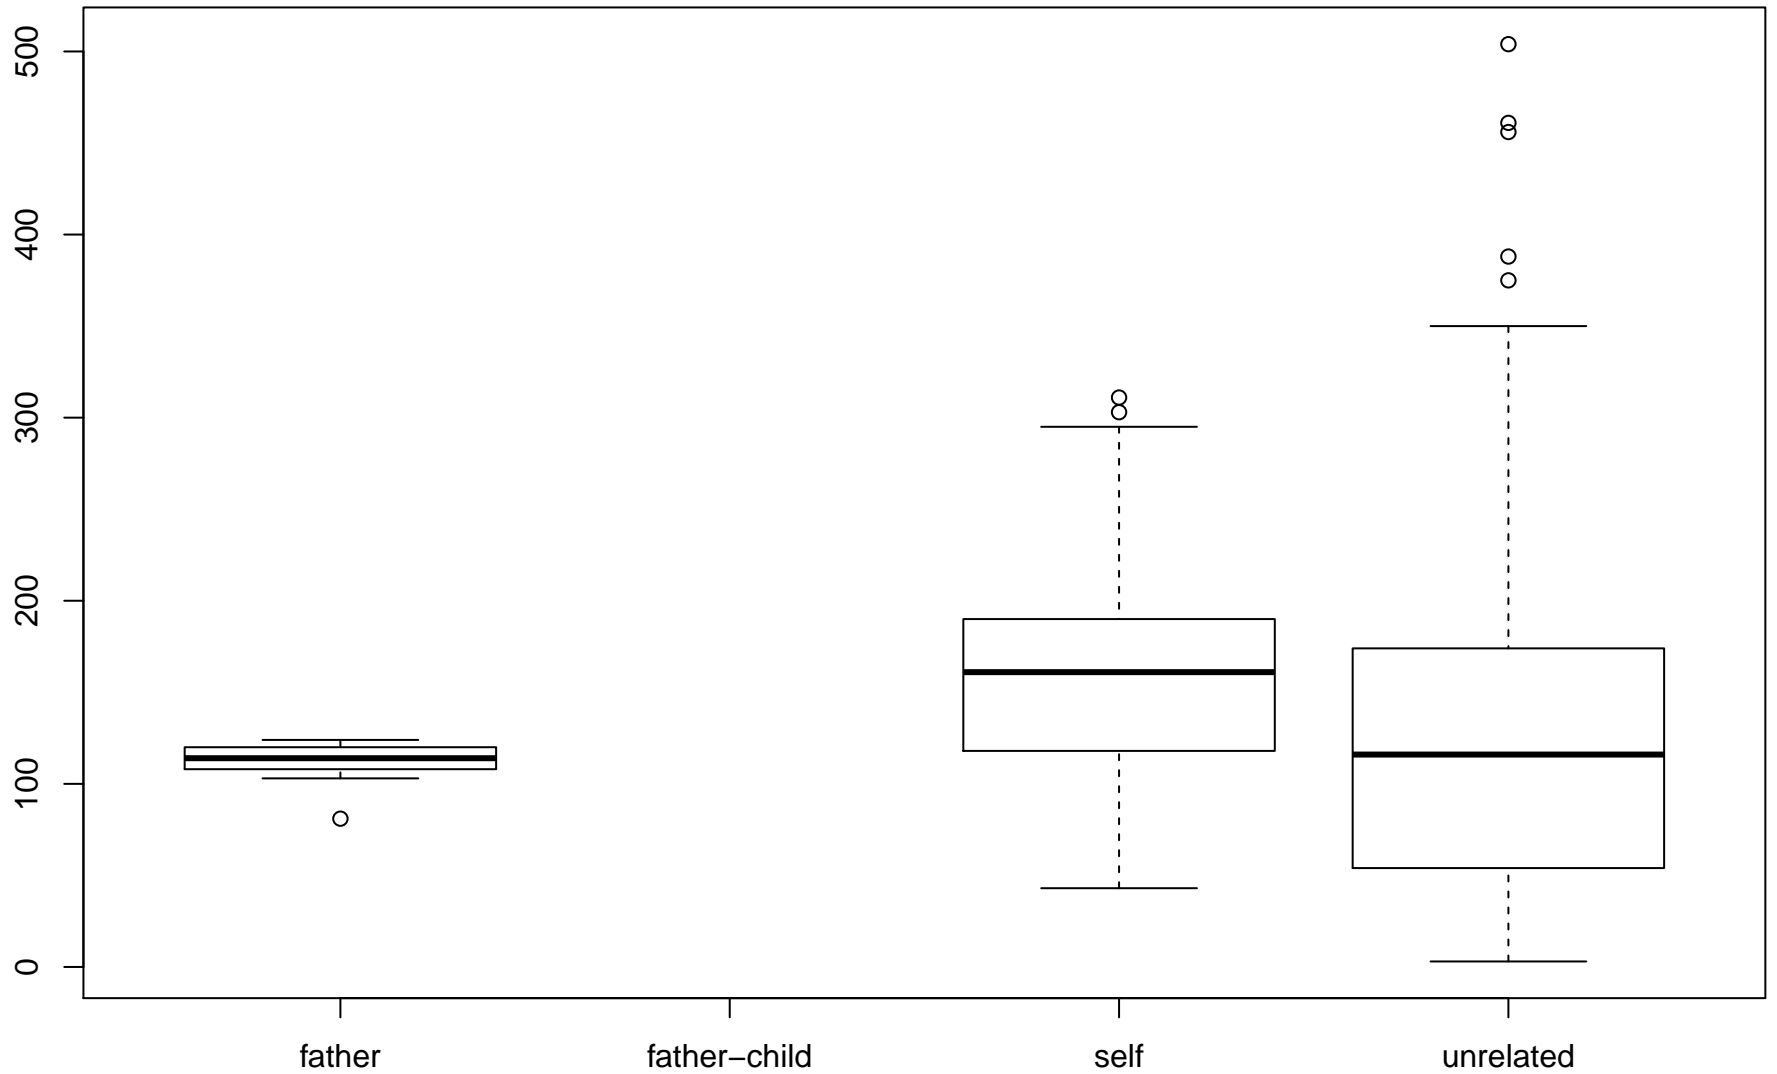

# Bifidobacterium animalis

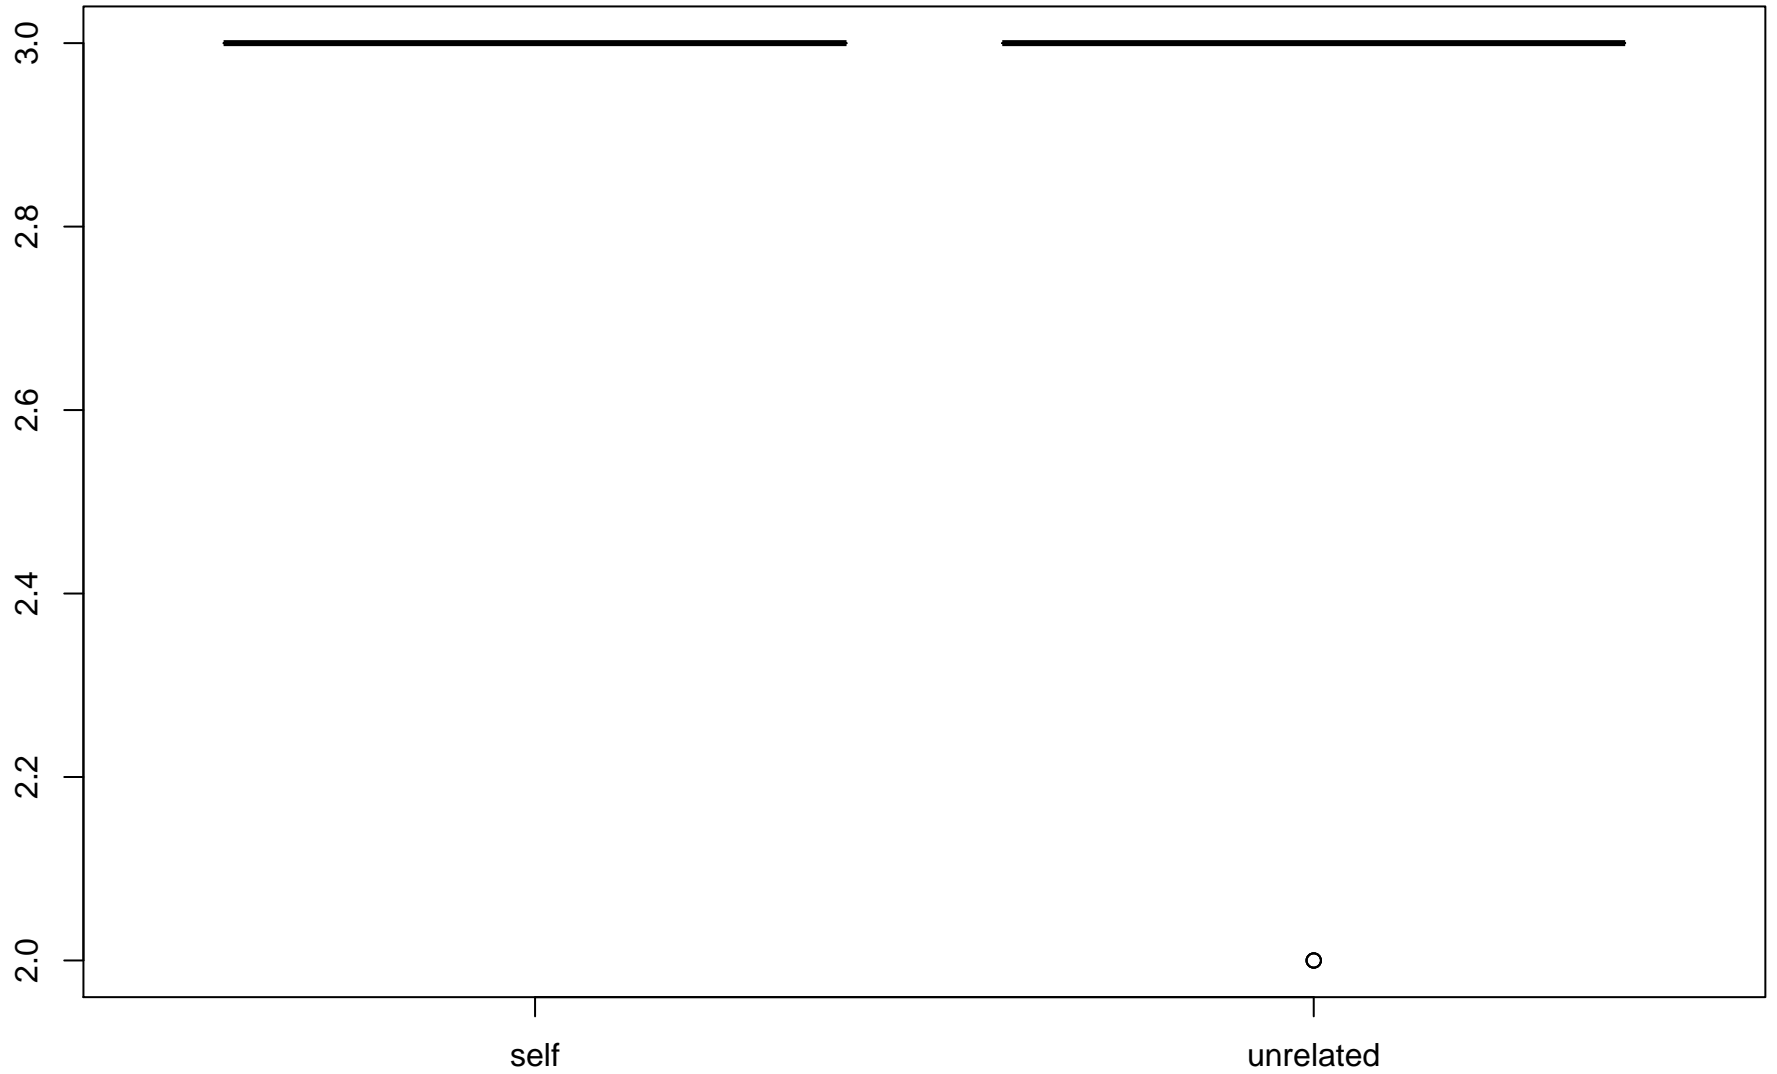

# Roseburia hominis

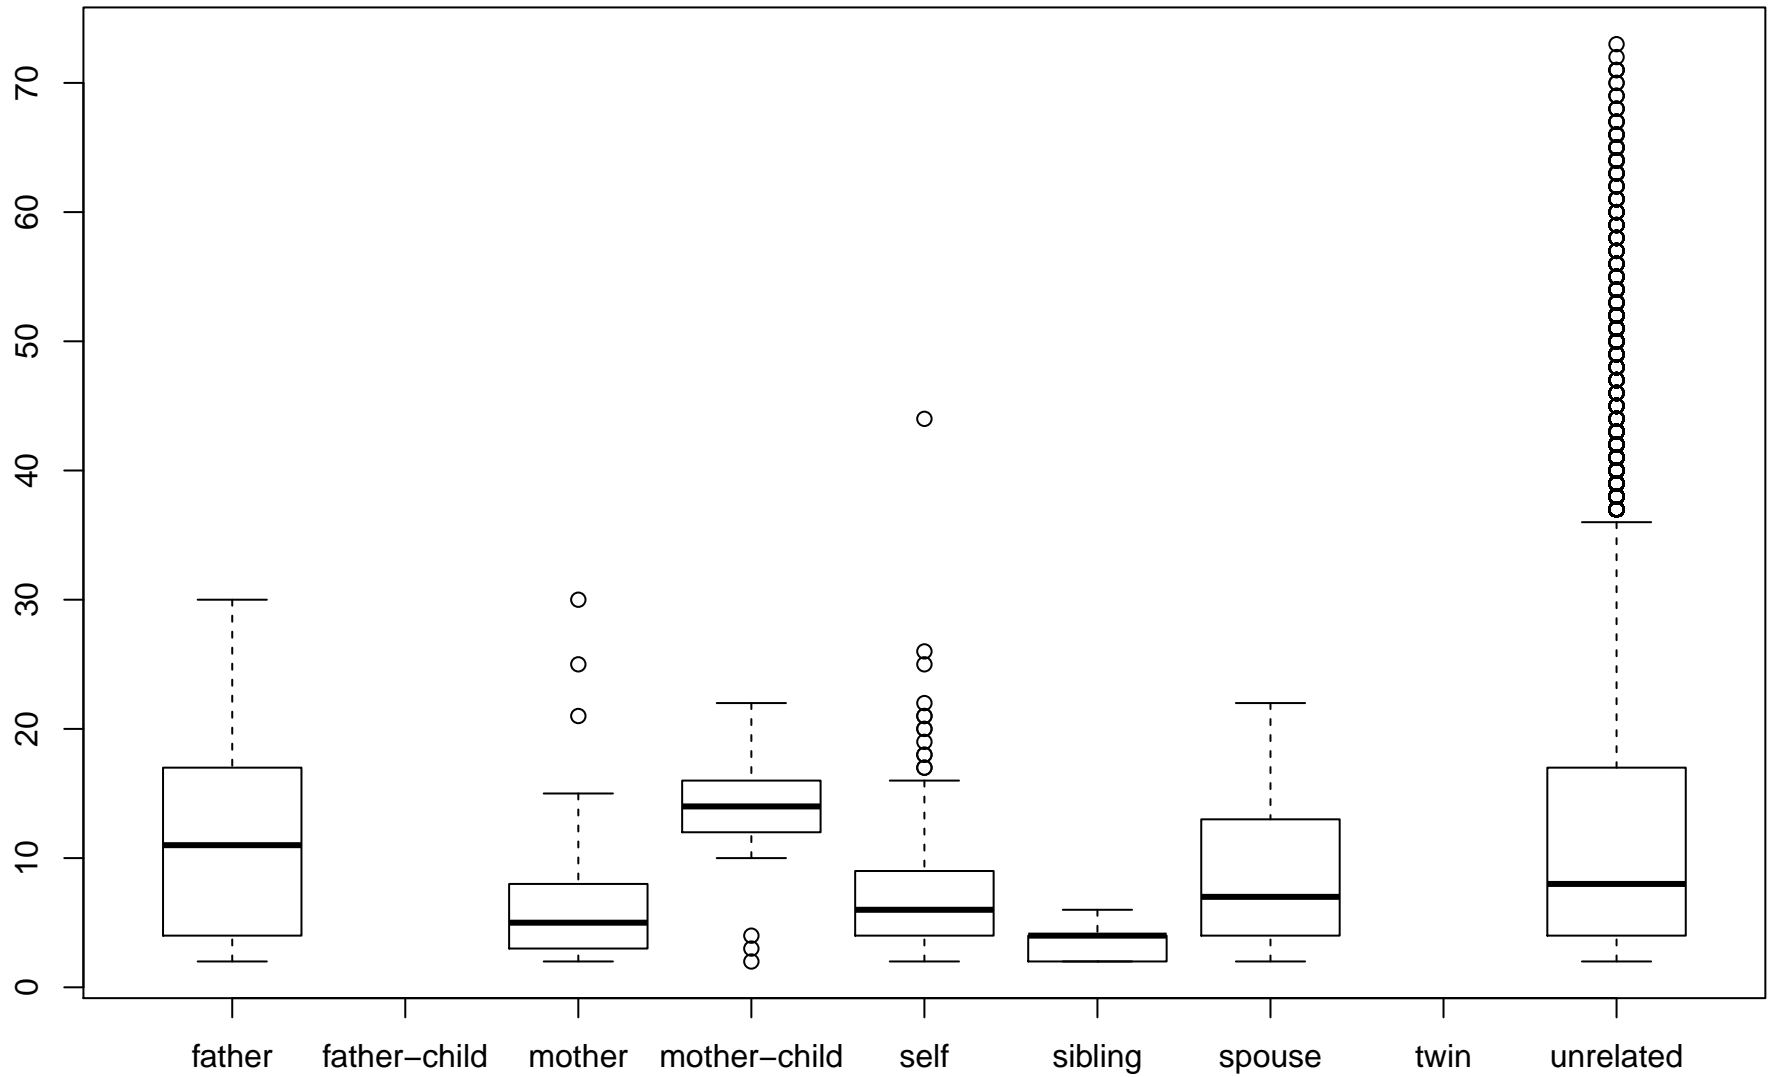

# Roseburia inulinivorans

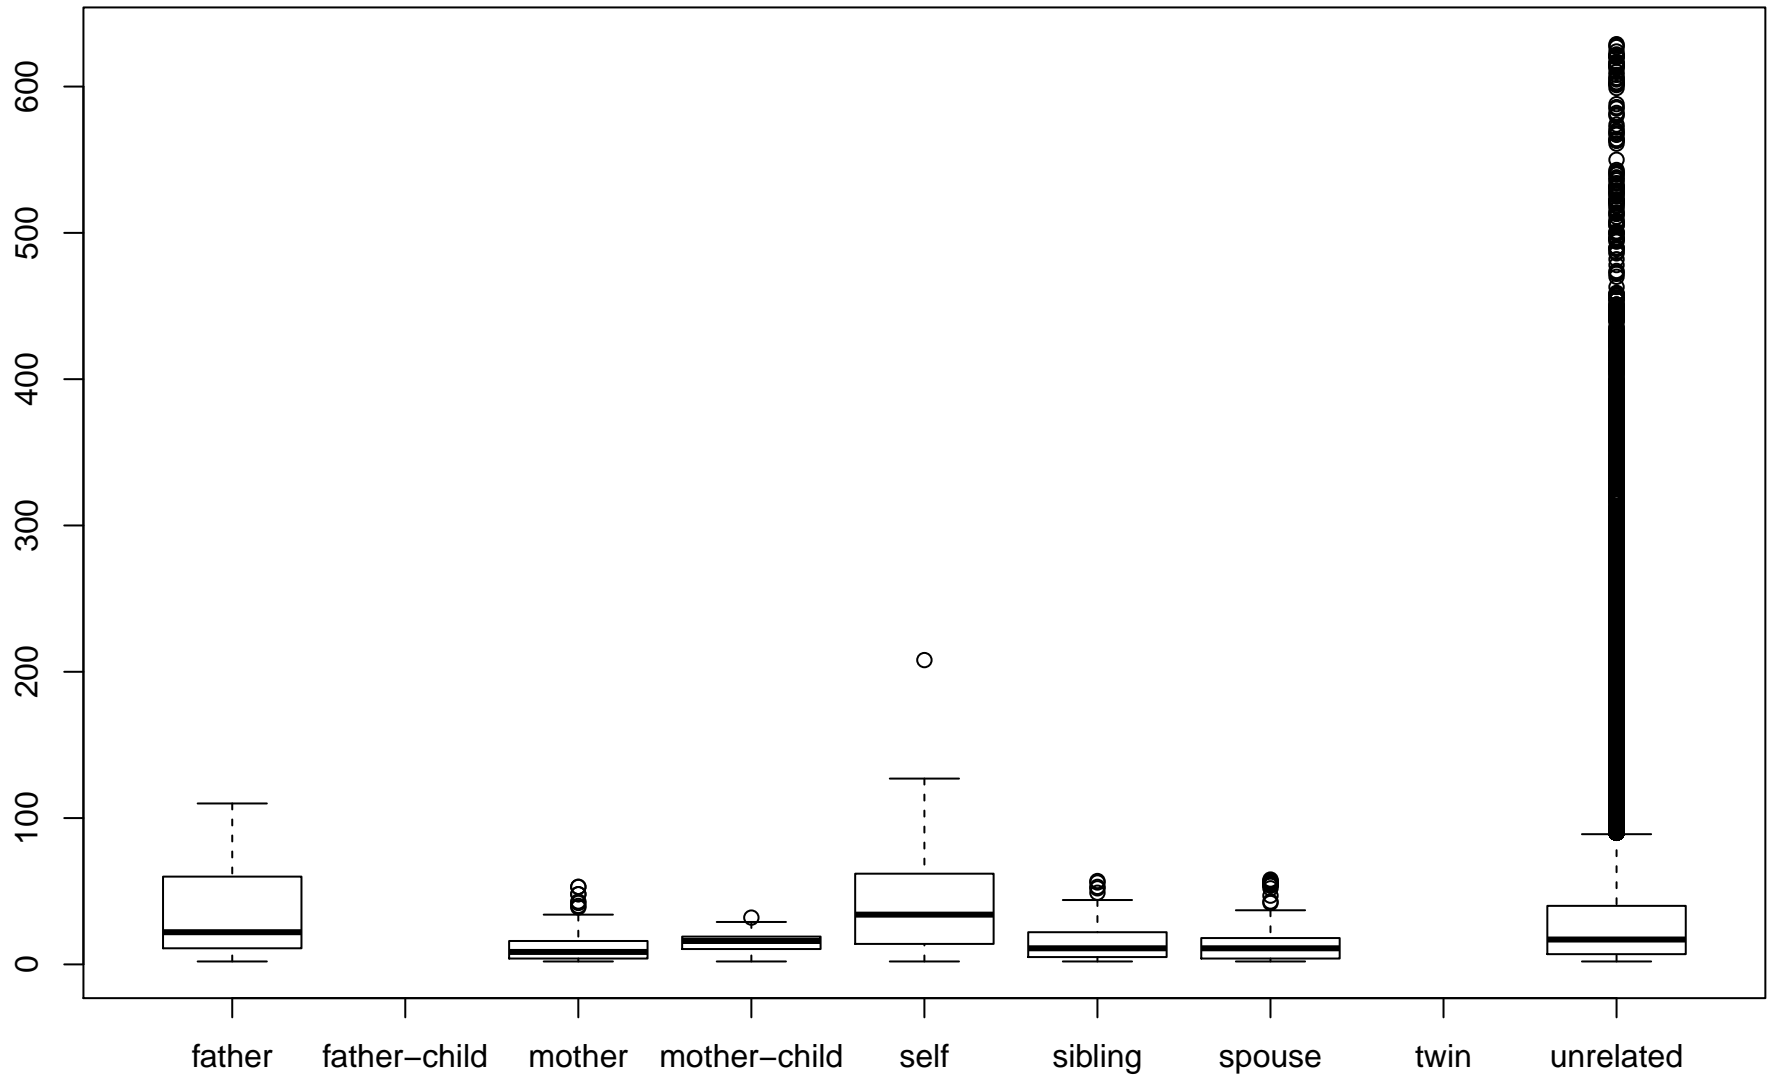

# Eubacterium siraeum

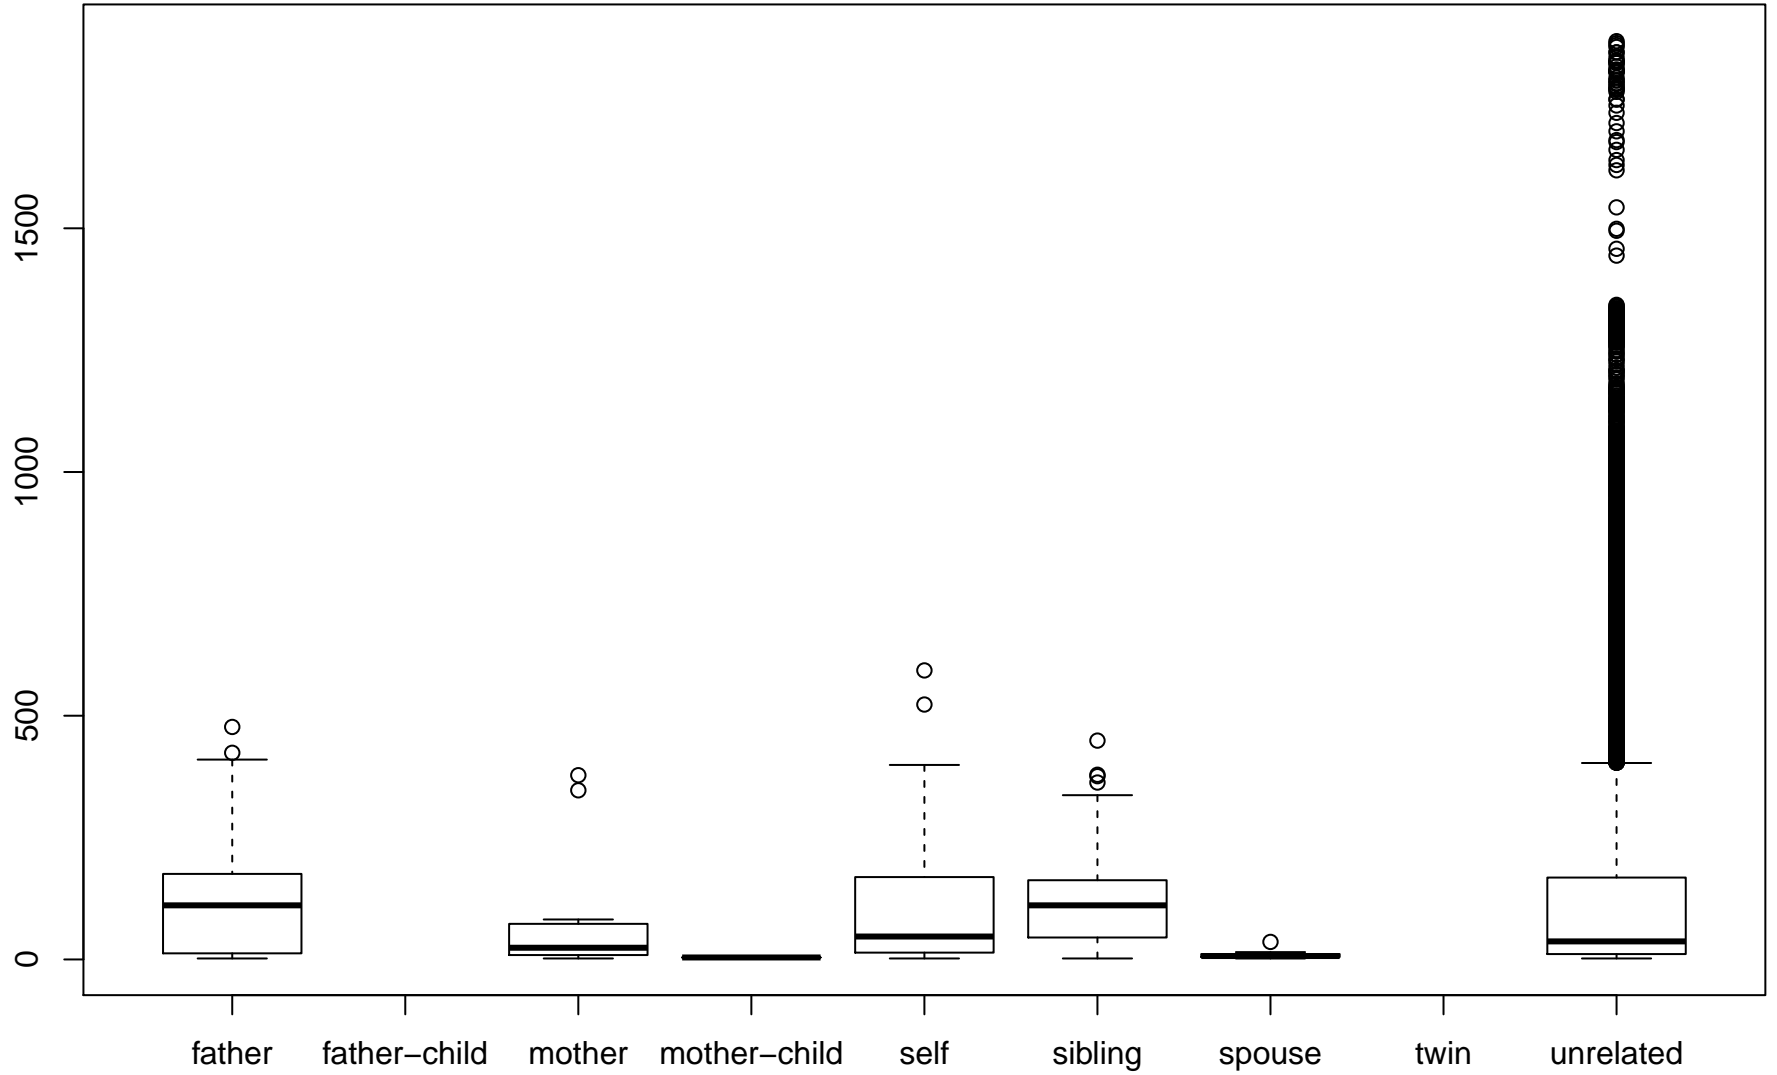

# Ruminococcus sp.

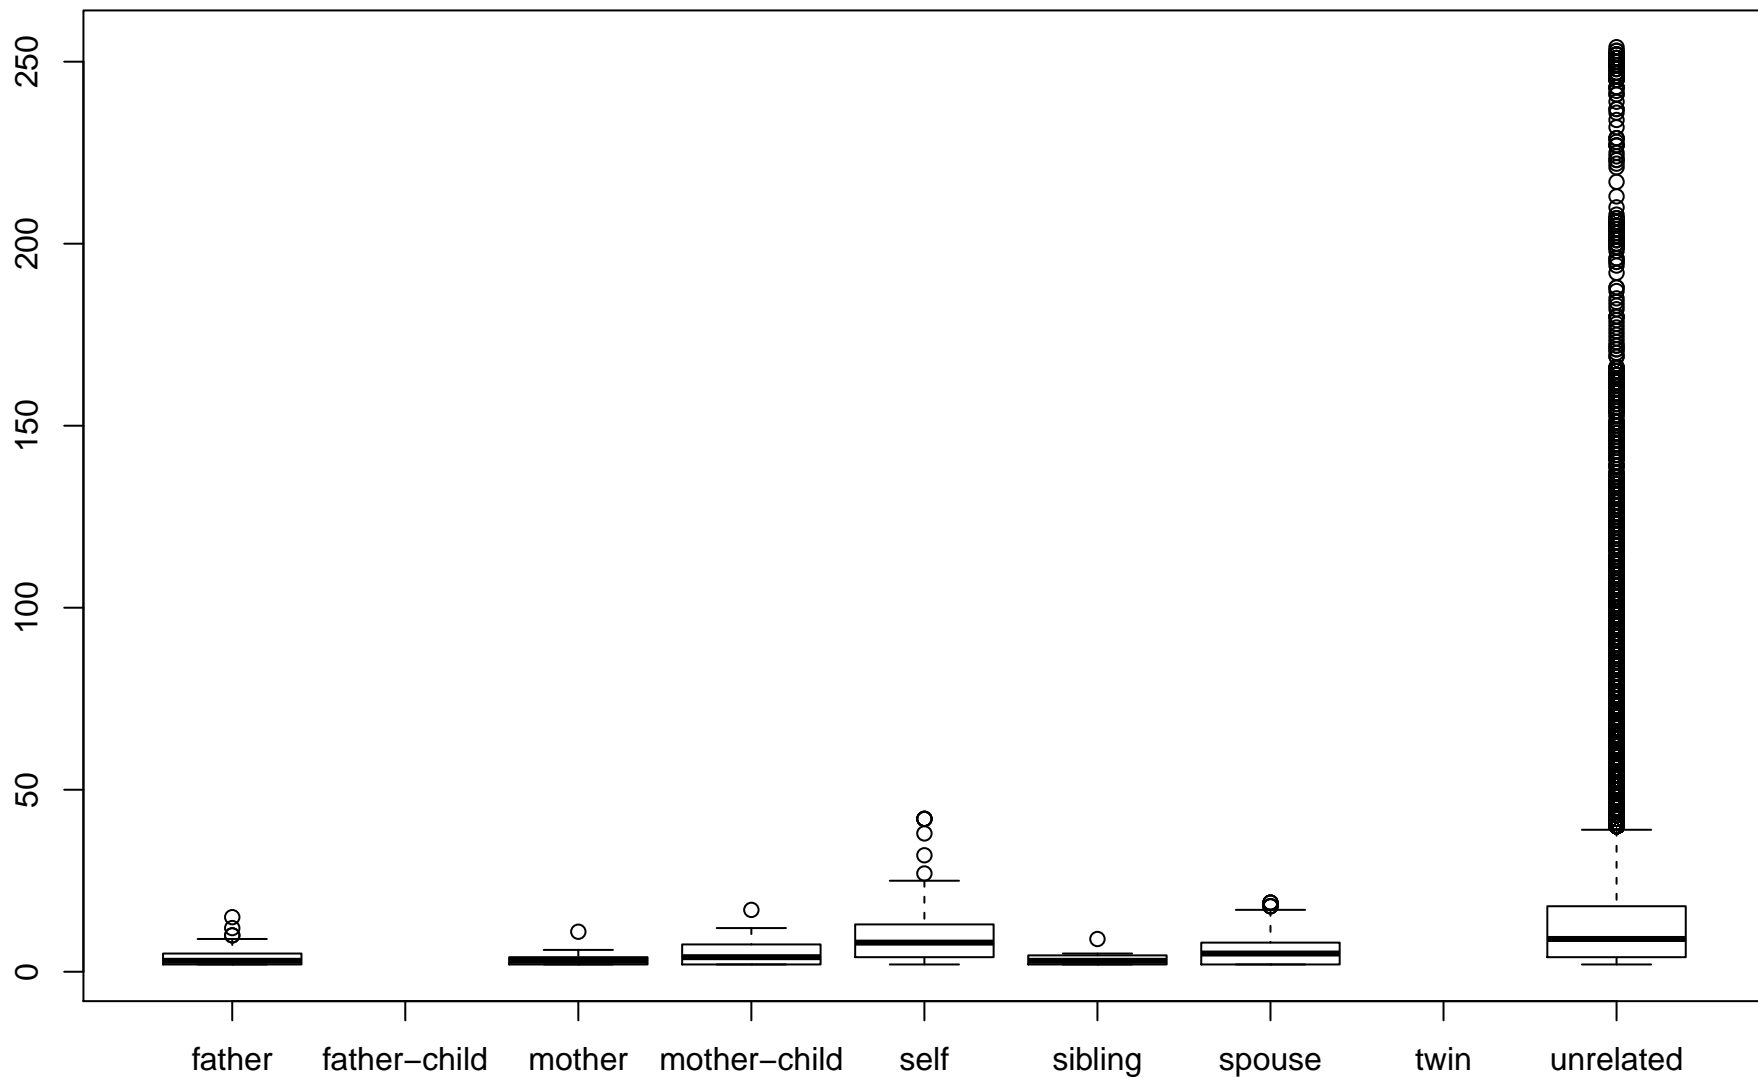

# Lachnospiraceae bacterium

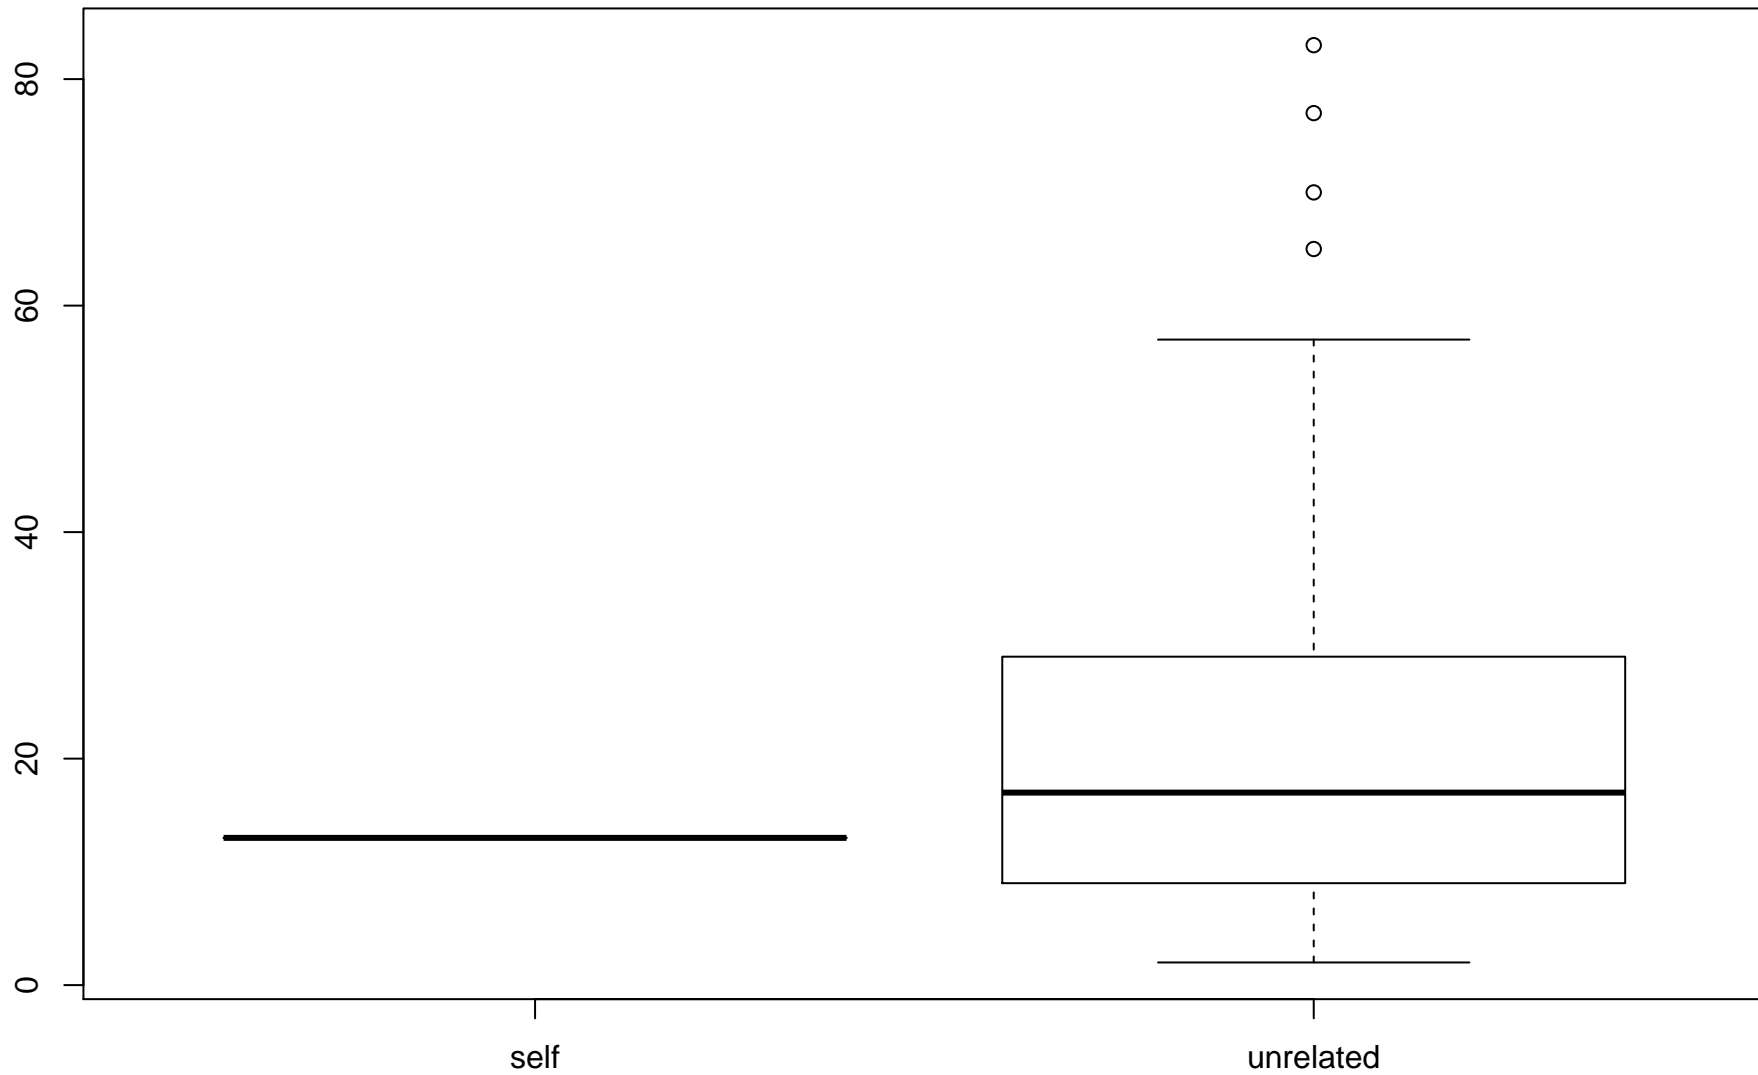



# Turicibacter sanguinis

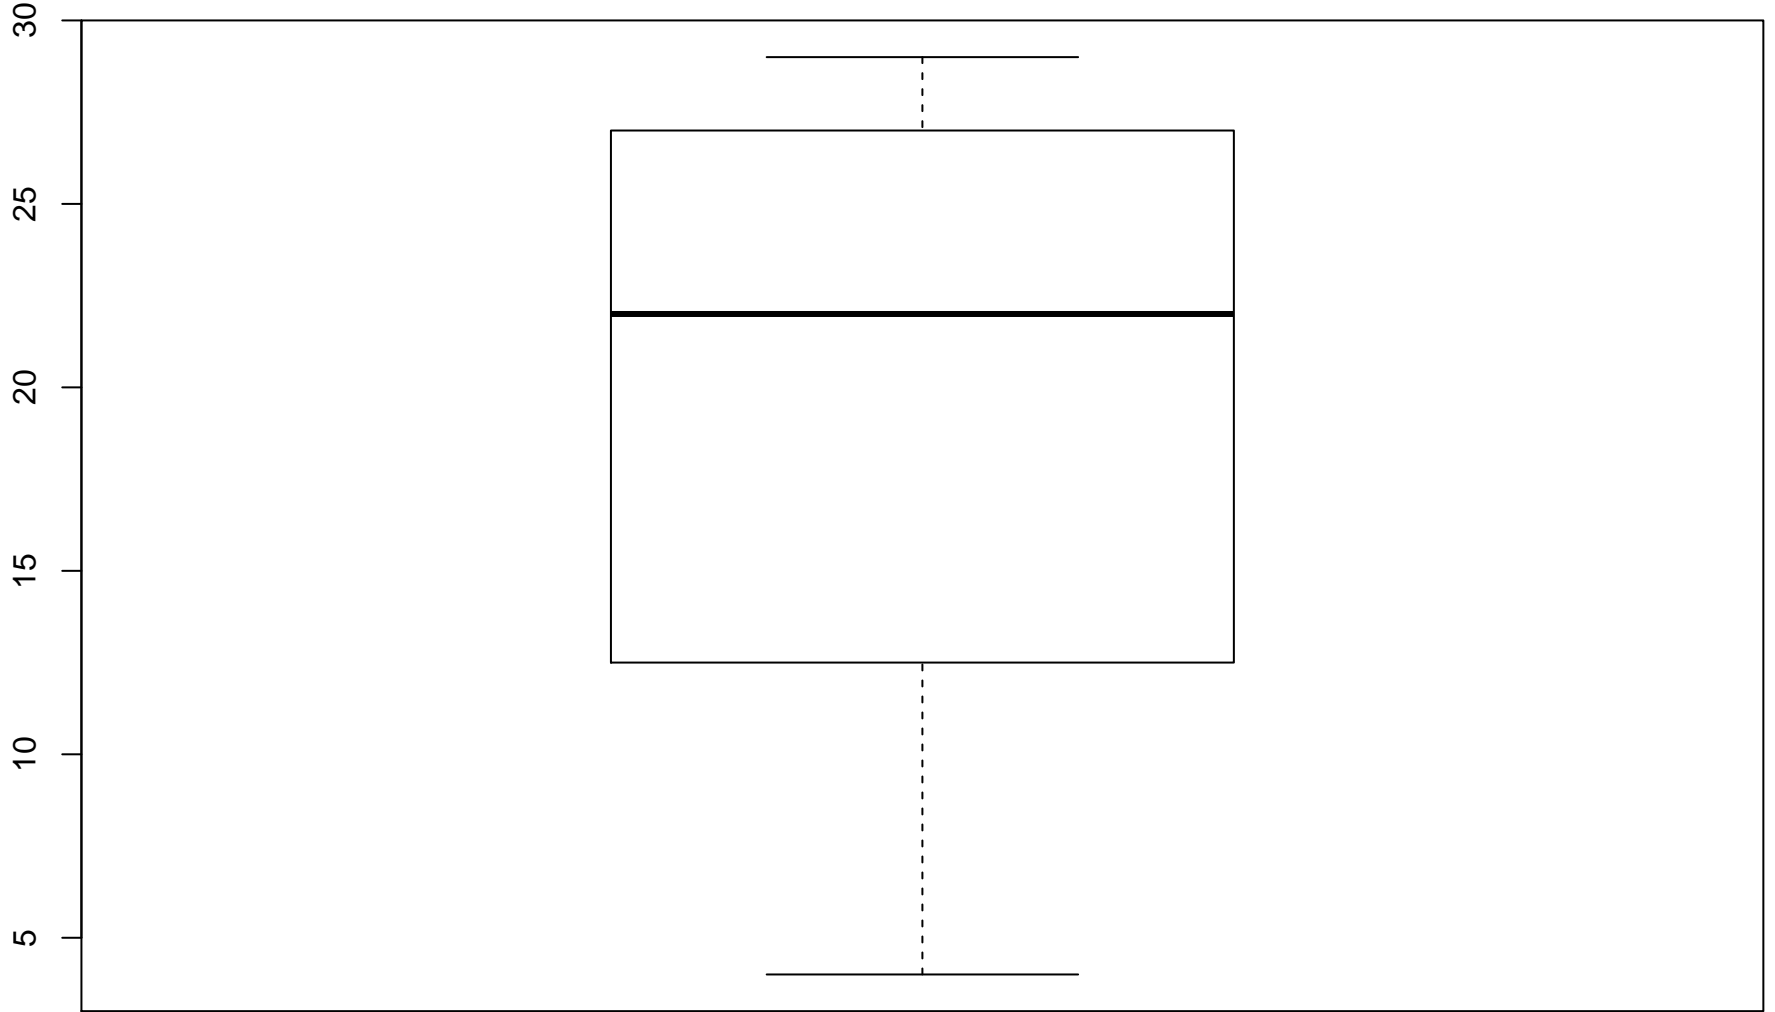

# Bifidobacterium bifidum

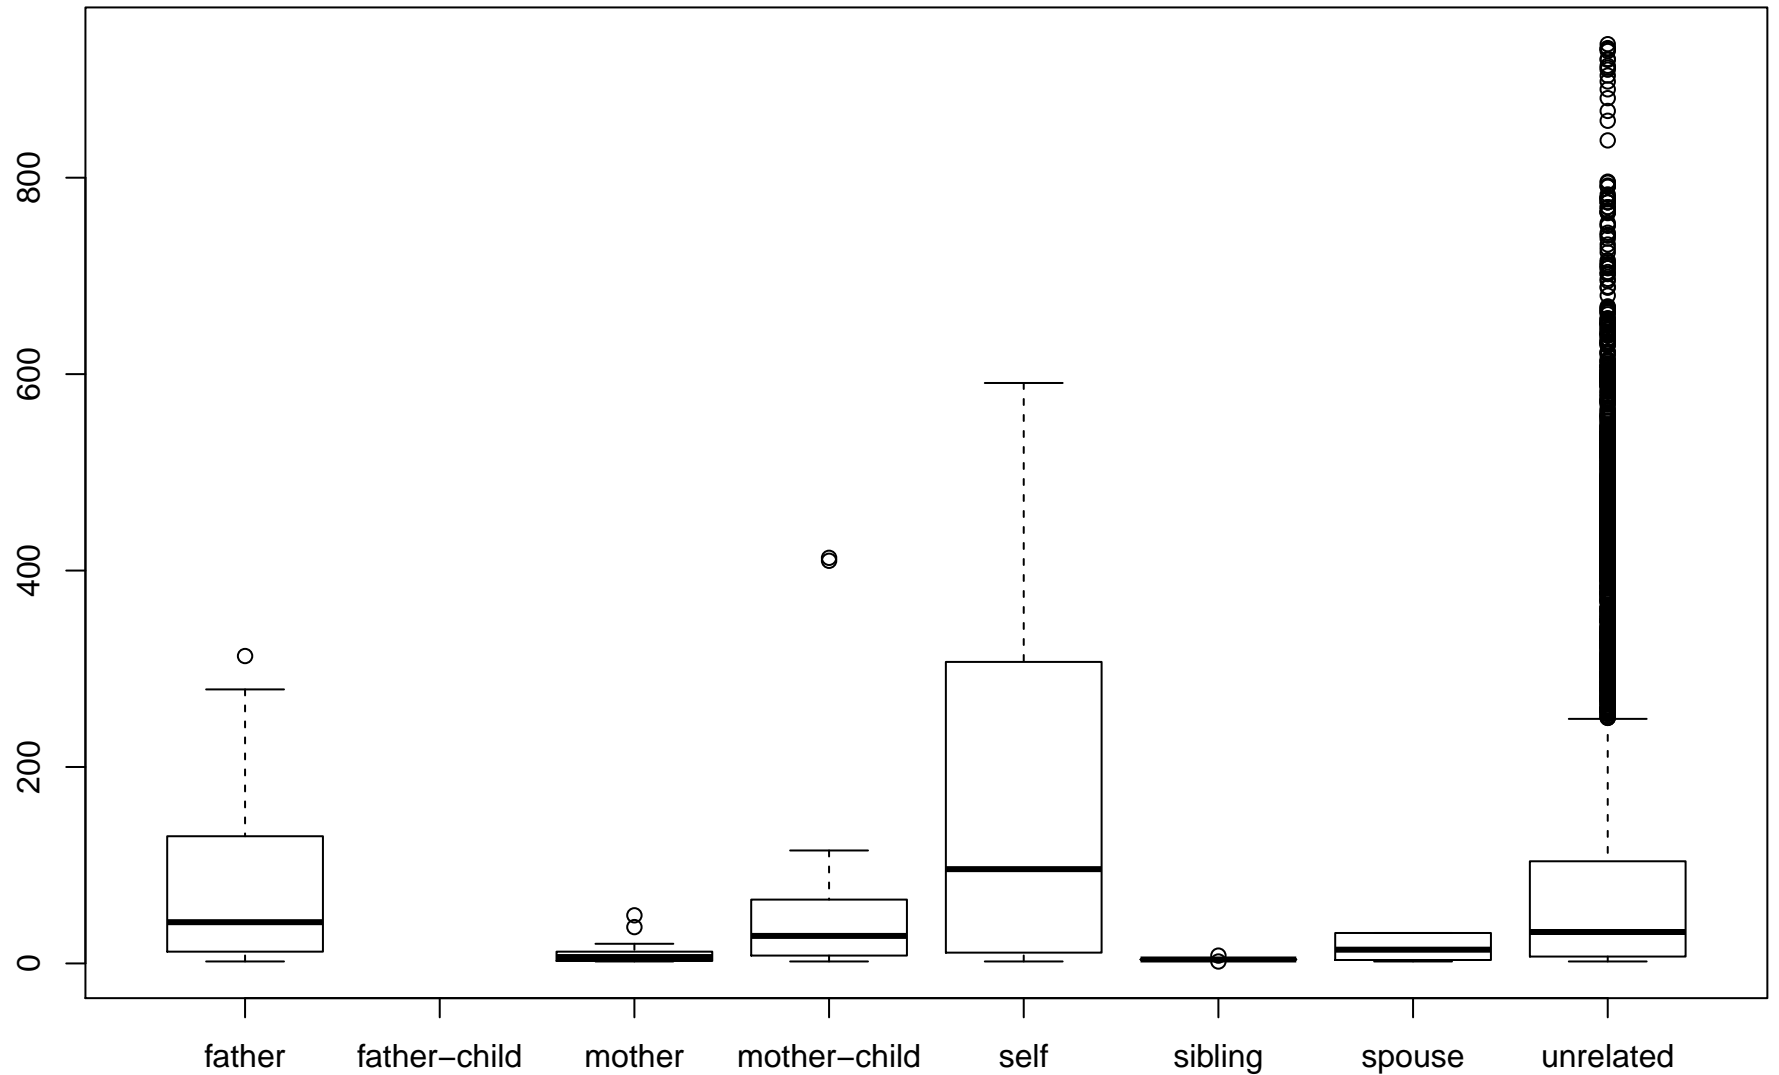

# Megasphaera micronuciformis

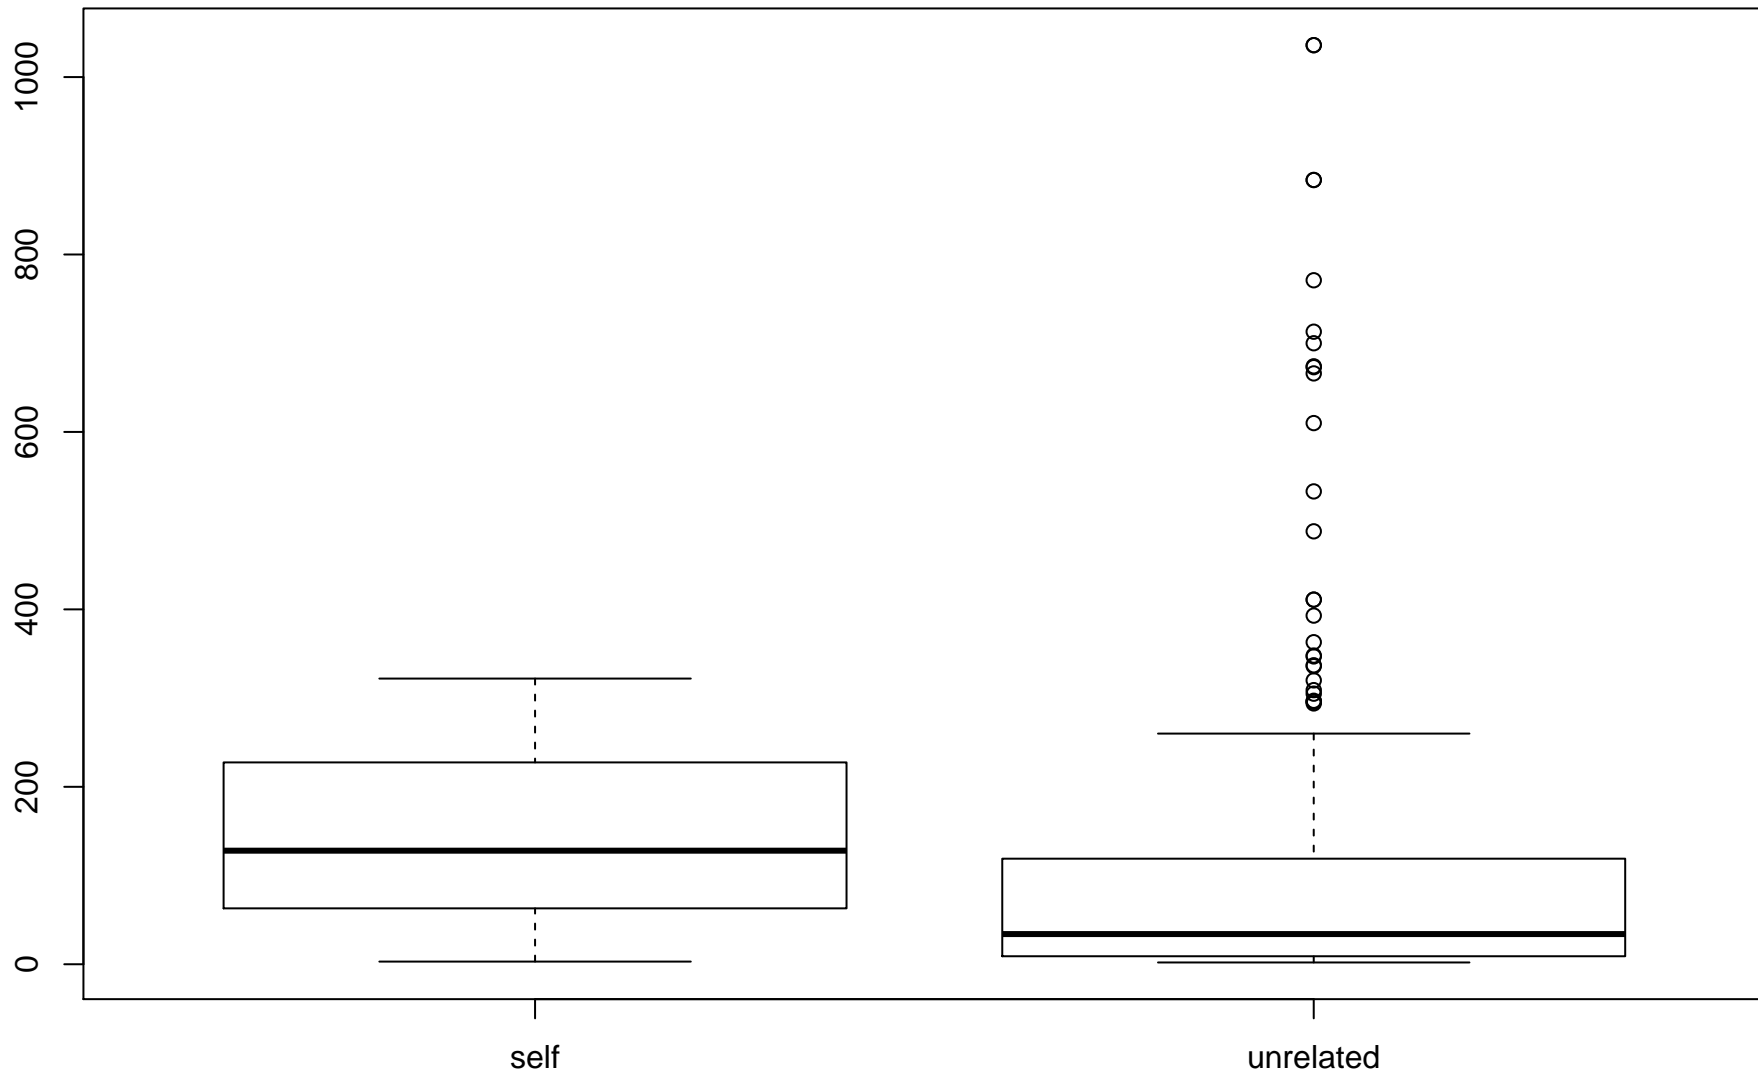

# Clostridium cf.

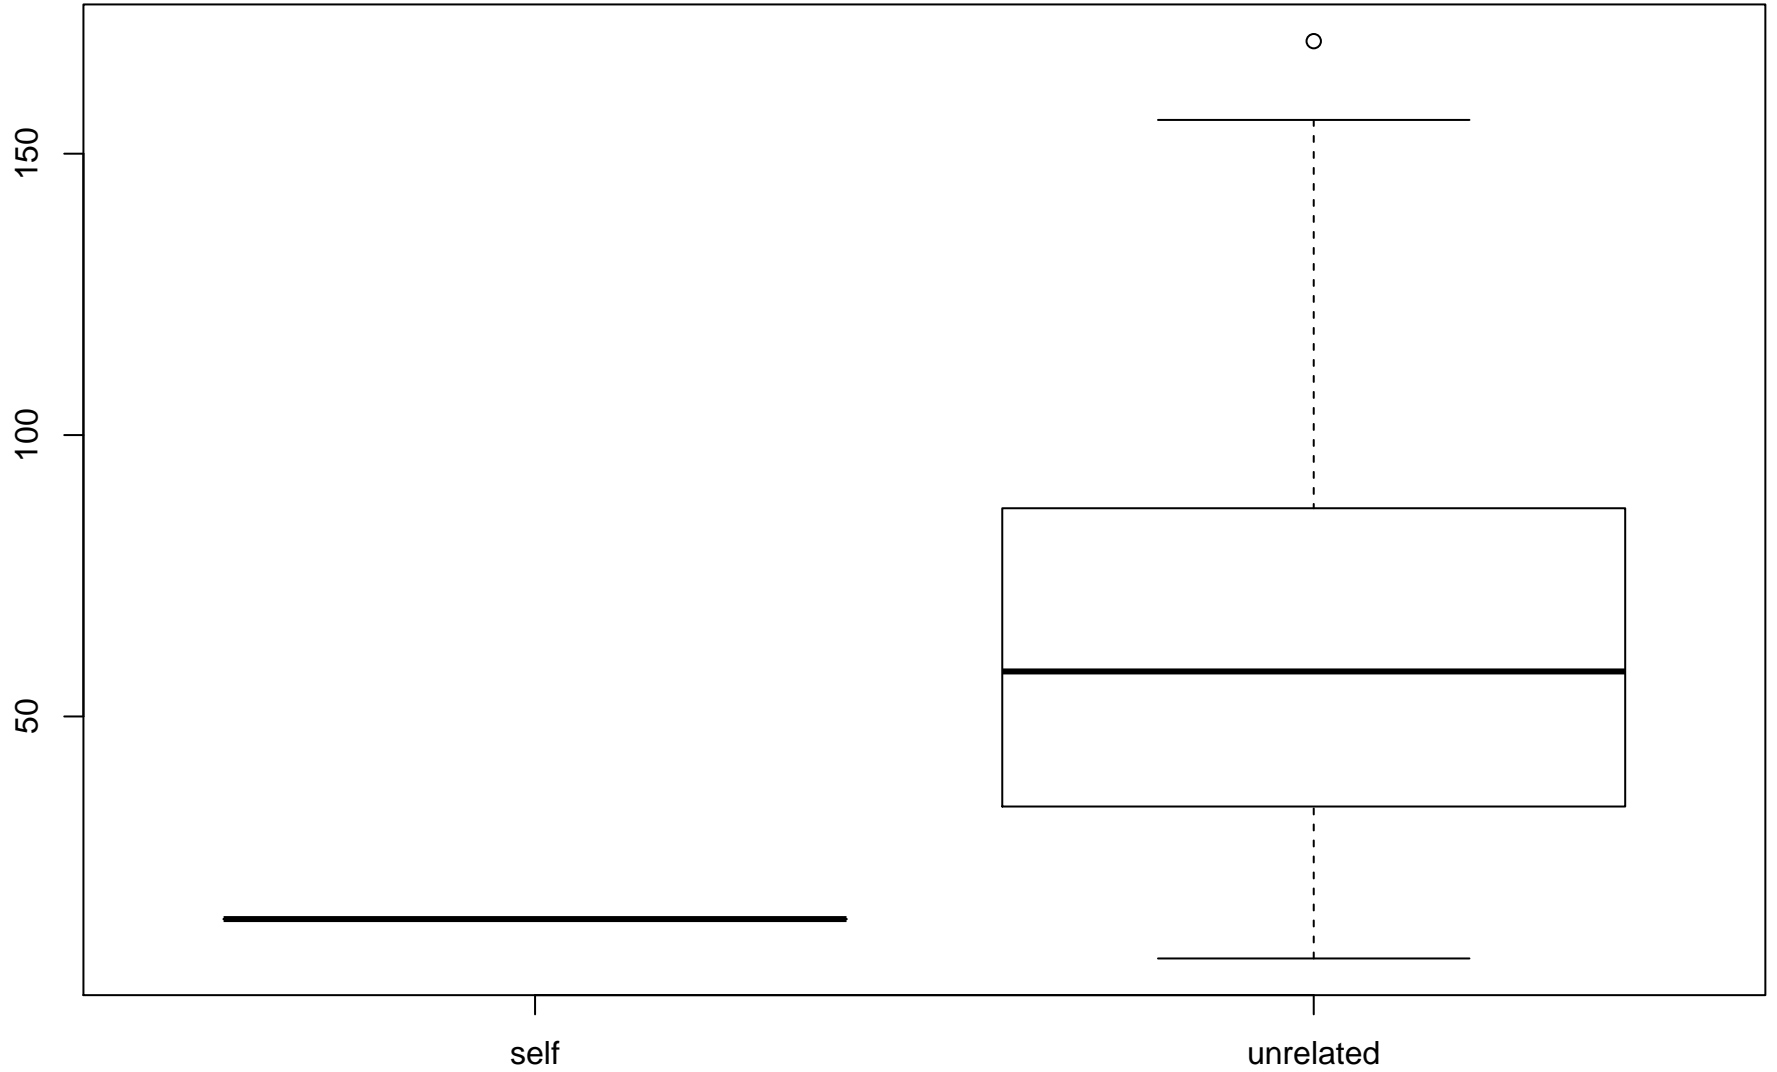

**Faecalitalea cylindroides**

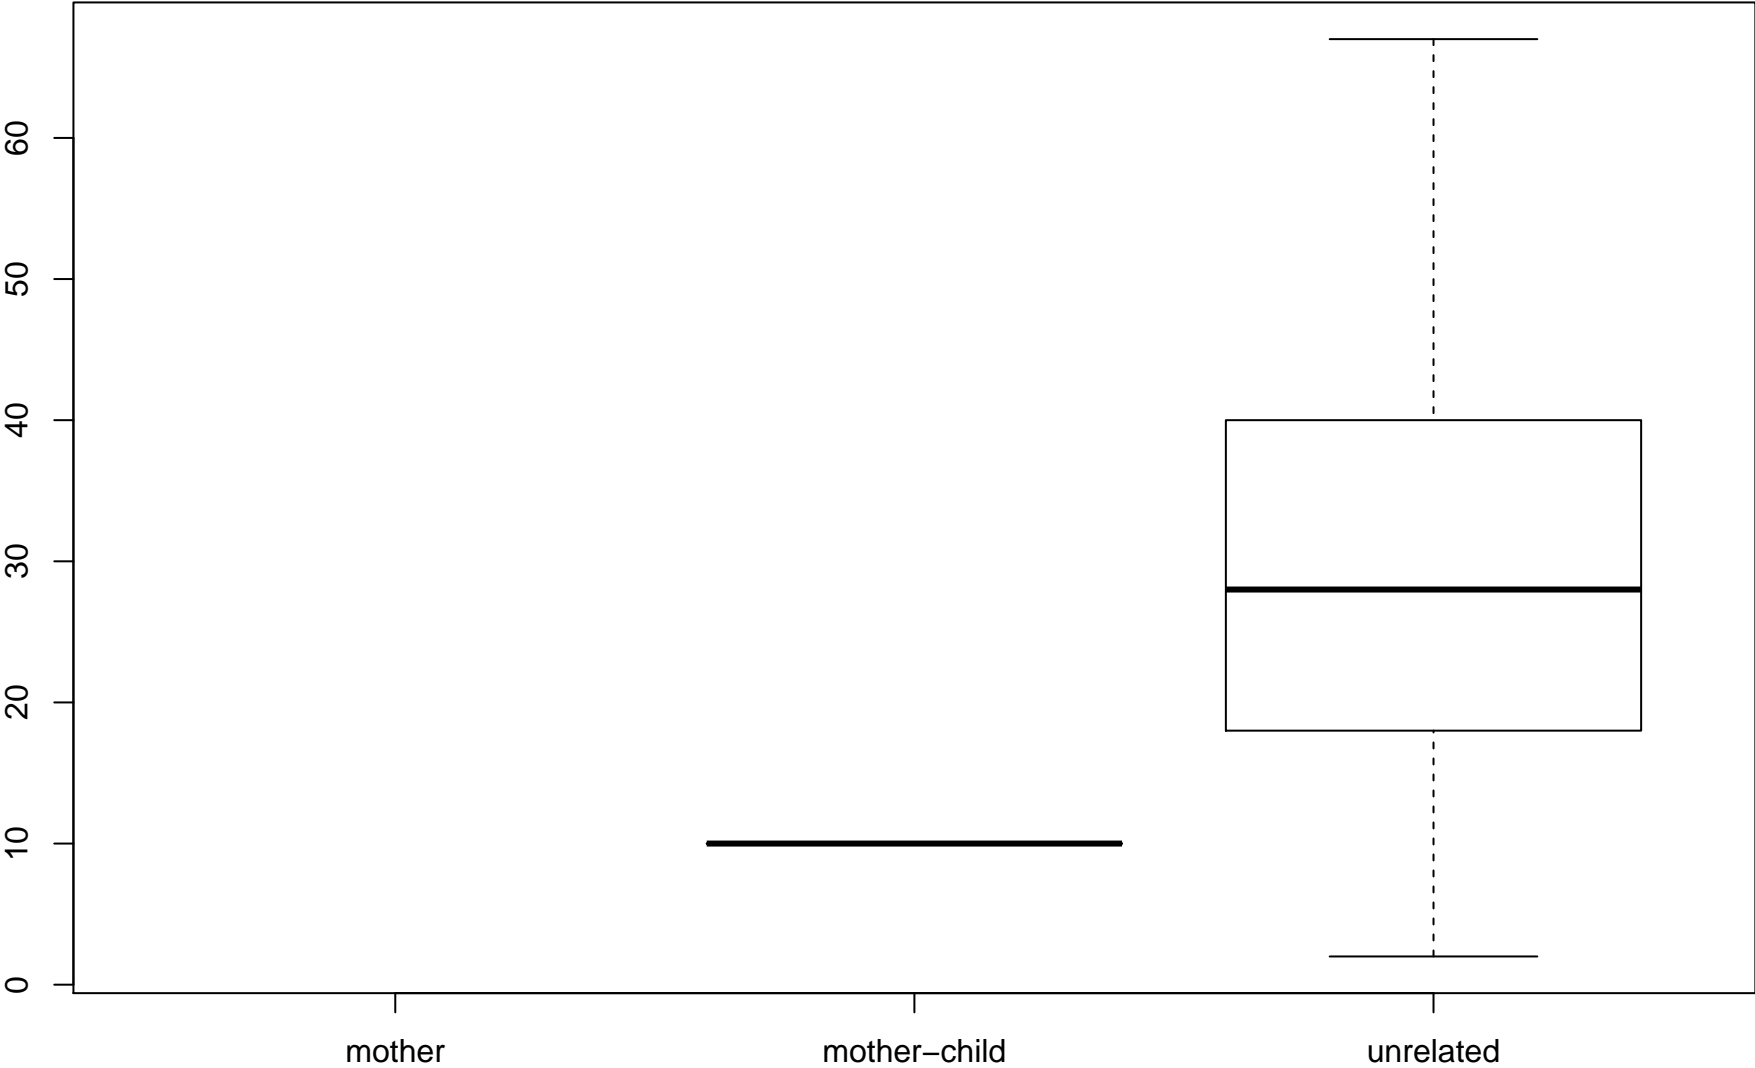

# Coprococcus catus

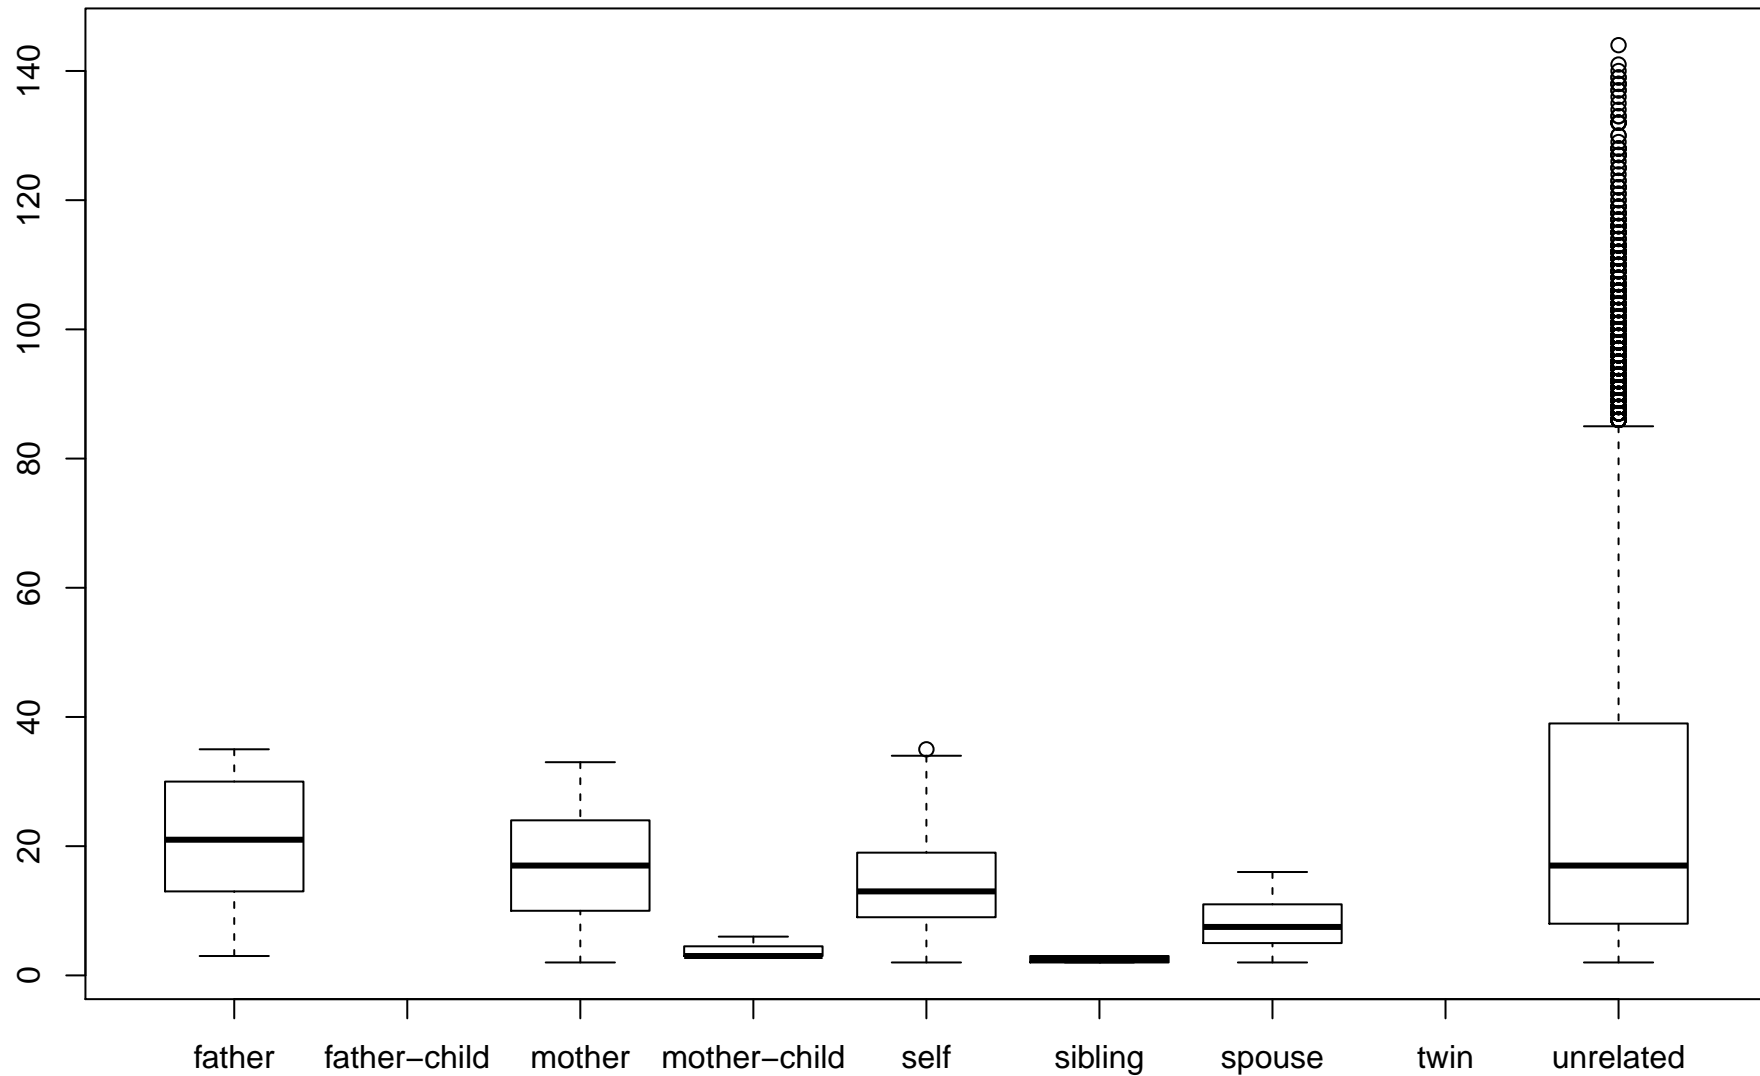



# Clostridium symbiosum

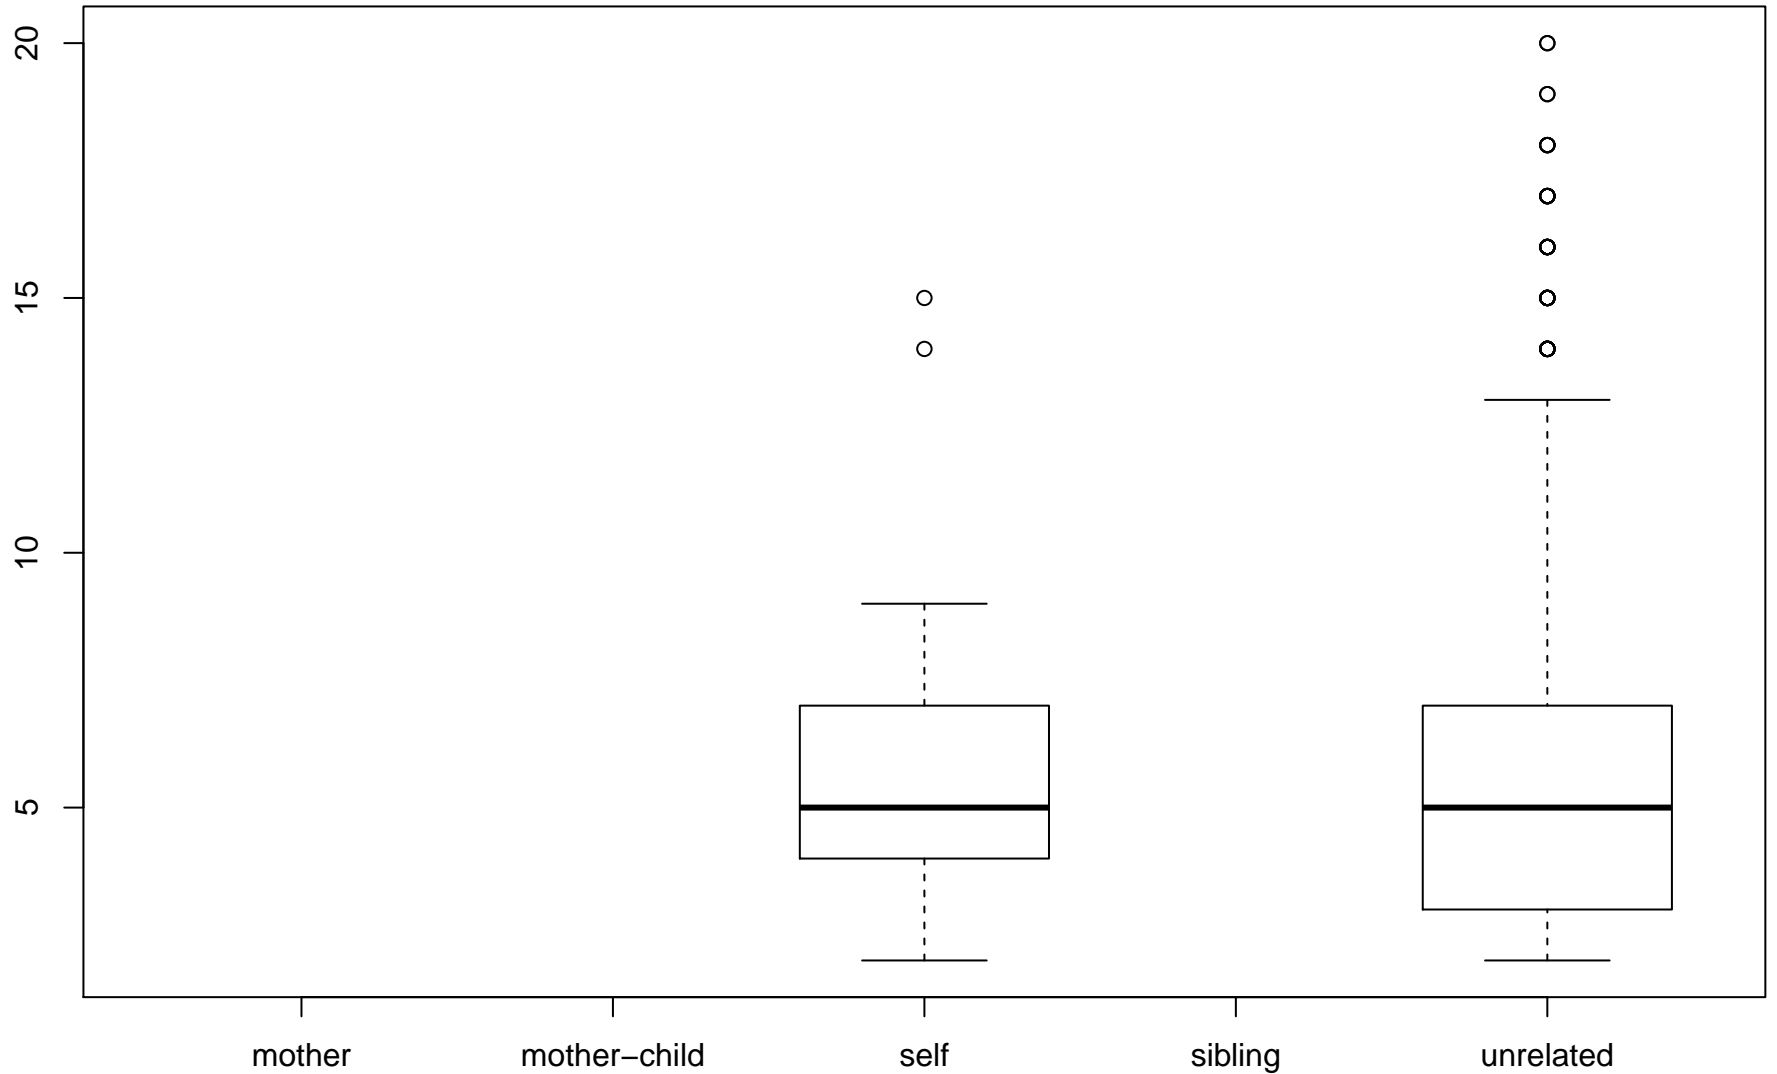



# Veillonella atypica

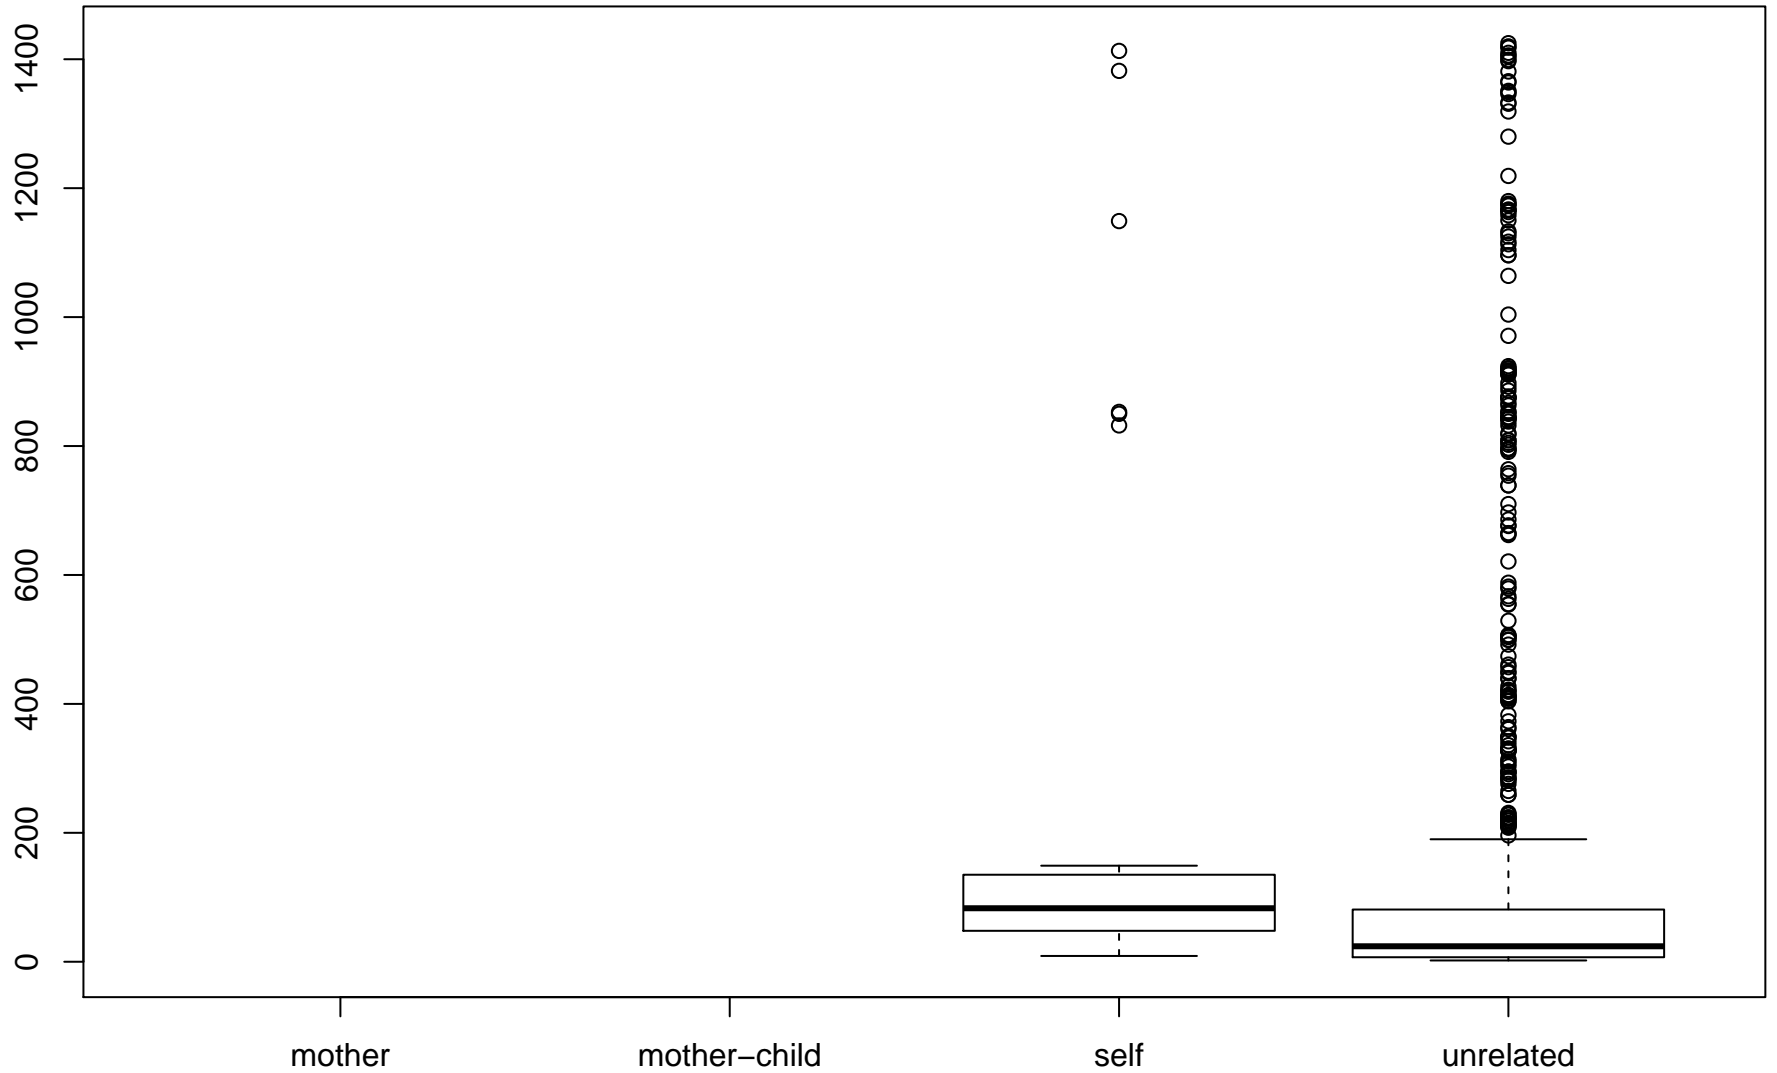

# Veillonella sp.

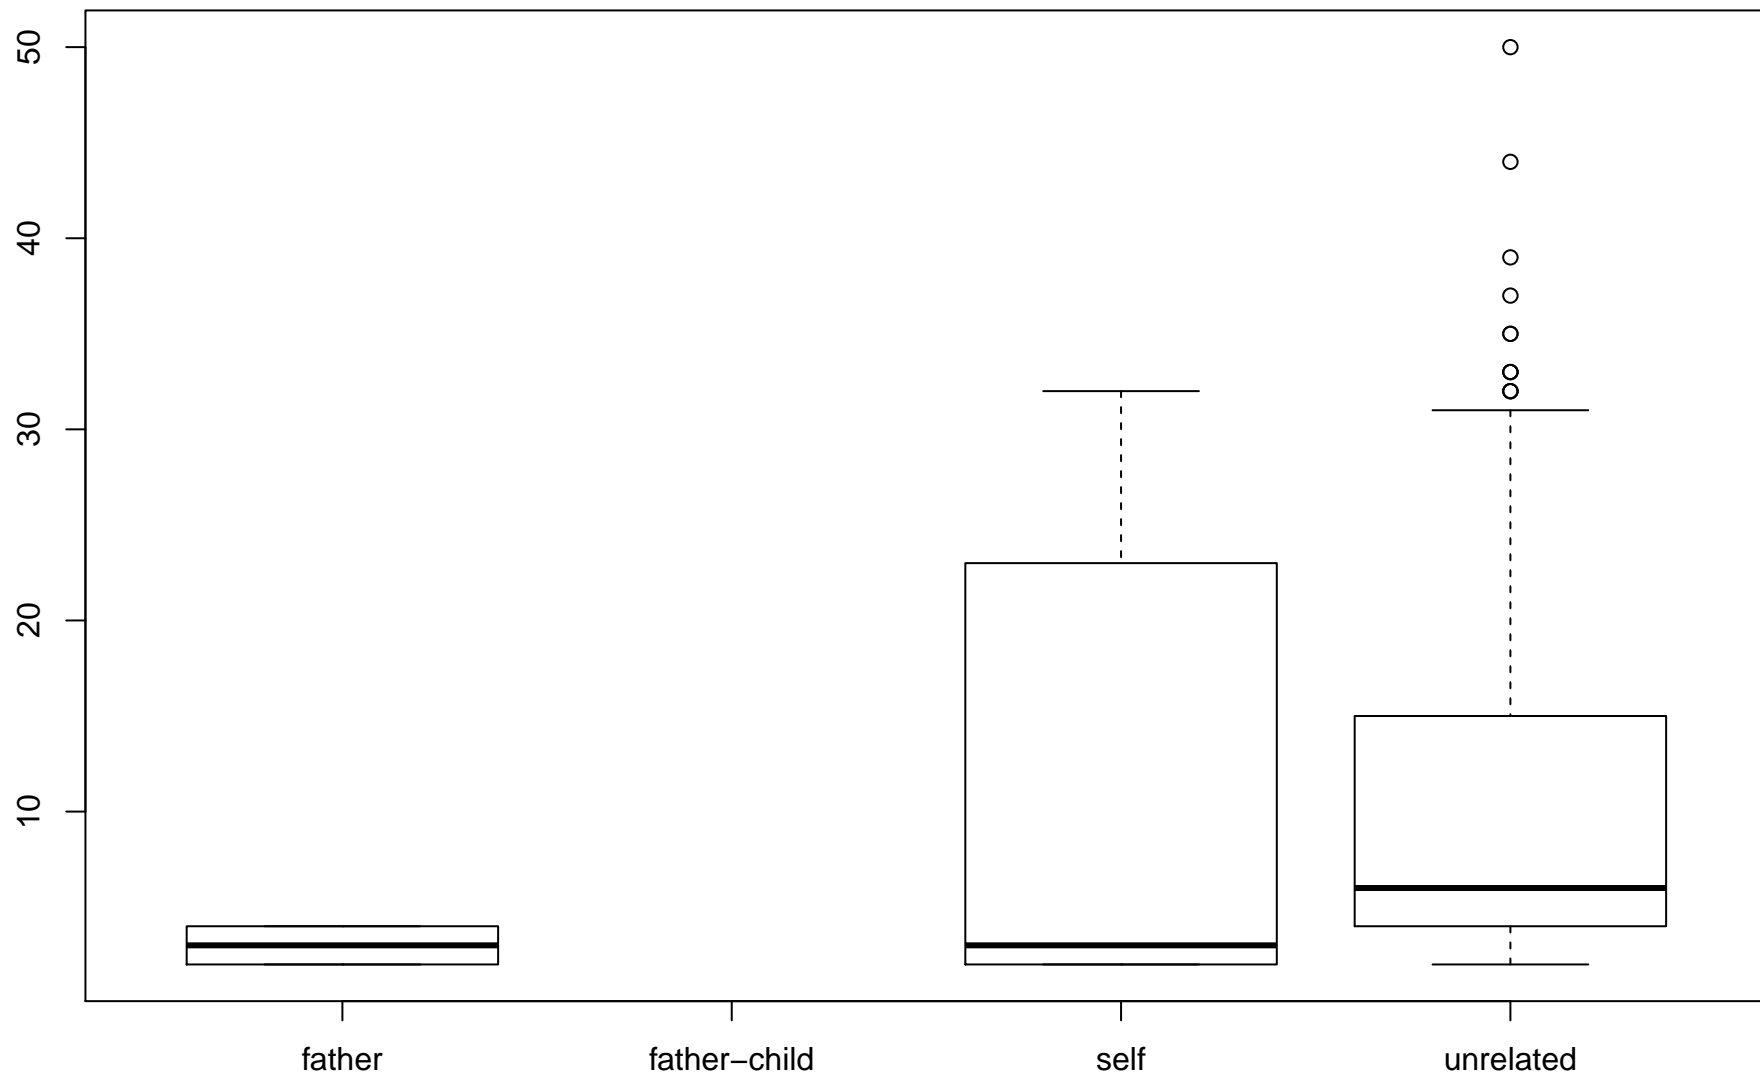

Supplement: supp_gr.233940.117_Supplemental_Fig_S10.pdf [file supp_gr.233940.117_Supplemental_Fig_S10.pdf]
