# Supplementary material for: Selective maternal seeding and environment shape the human gut microbiome
Source: PubMed Central journal article supplement (PMC5880245; doi:10.1101/gr.233940.117), 2018-04
Supplement: supp_gr.233940.117_Supplemental_Fig_S4.pdf [file supp_gr.233940.117_Supplemental_Fig_S4.pdf]

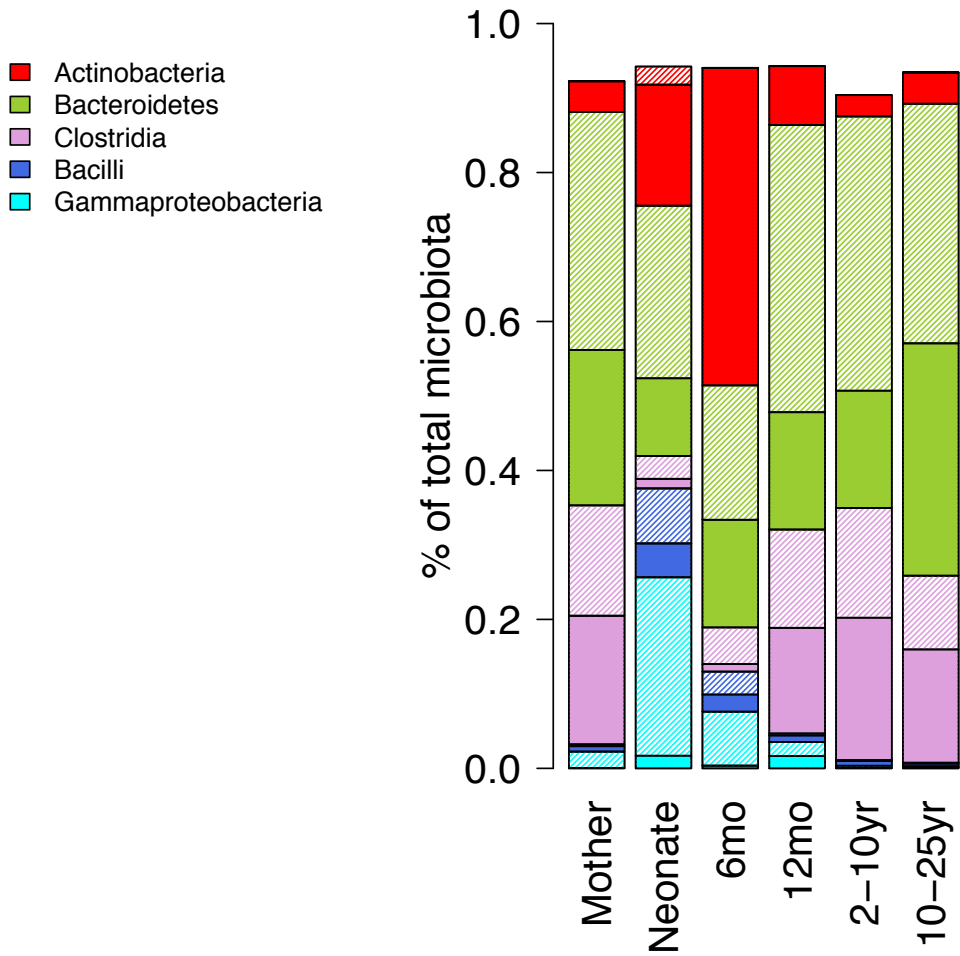

Supplemental Figure S3.

Average relative abundance of the most abundant bacterial taxa at different ages. Solid colours indicate rmSNV-tracked species, and dashed colours species that were not tracked.
