# Supplementary material for: Selective maternal seeding and environment shape the human gut microbiome
Source: PubMed Central journal article supplement (PMC5880245; doi:10.1101/gr.233940.117), 2018-04
Supplement: supp_gr.233940.117_Supplemental_Fig_S5.pdf [file supp_gr.233940.117_Supplemental_Fig_S5.pdf]

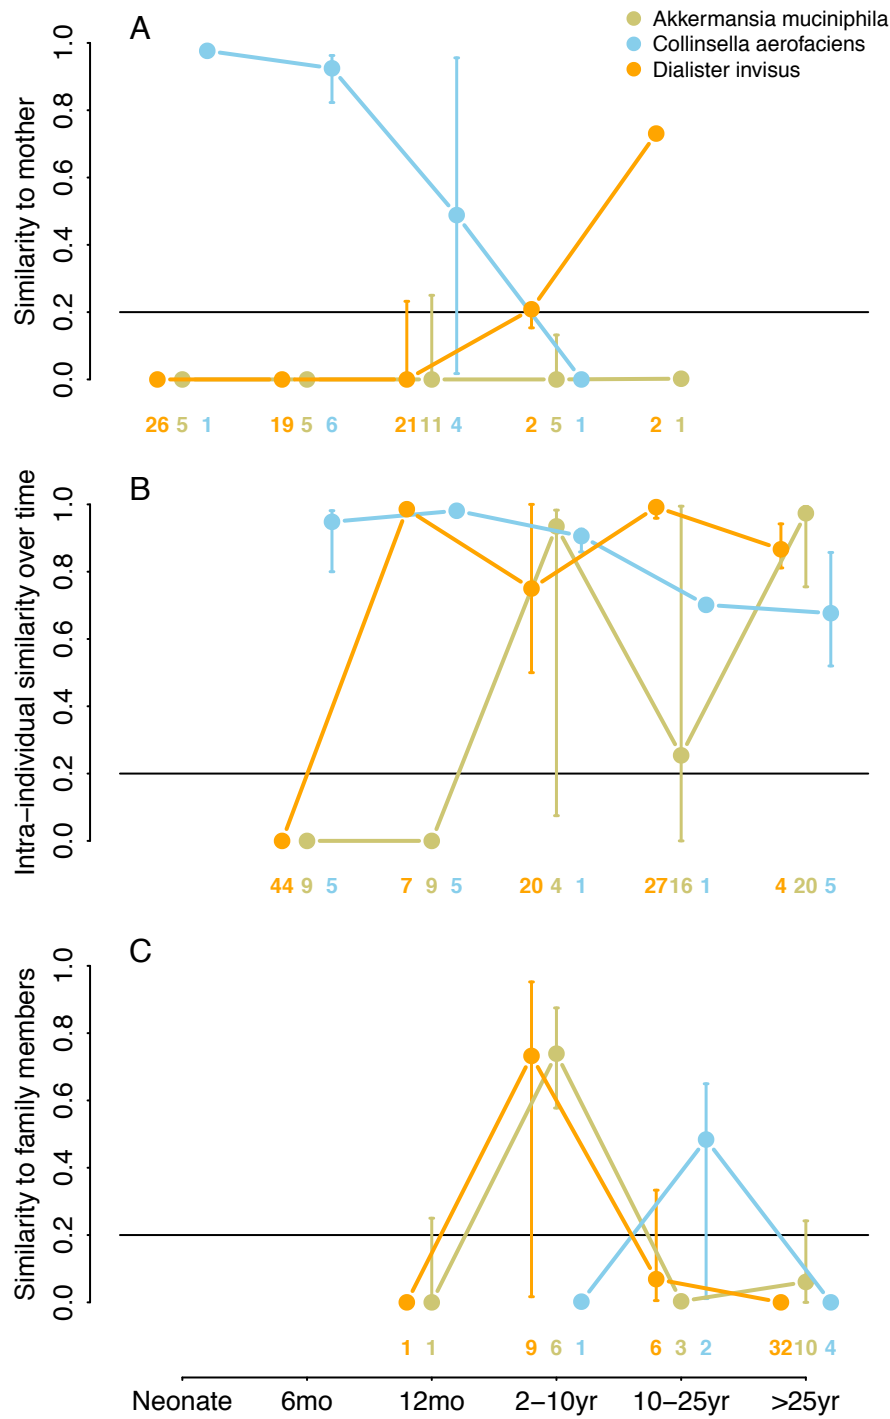

Supplemental Figure S4.

Strain similarity to mother (A), intra-individual similarity over time (B) and similarity to other family members (C) in three bacterial species not belonging to the abundant classes. The symbols represent group medians  $\pm$  inter-quartile range.
