# Supplementary material for: Selective maternal seeding and environment shape the human gut microbiome
Source: PubMed Central journal article supplement (PMC5880245; doi:10.1101/gr.233940.117), 2018-04
Supplement: supp_gr.233940.117_Supplemental_Fig_S8.pdf [file supp_gr.233940.117_Supplemental_Fig_S8.pdf]

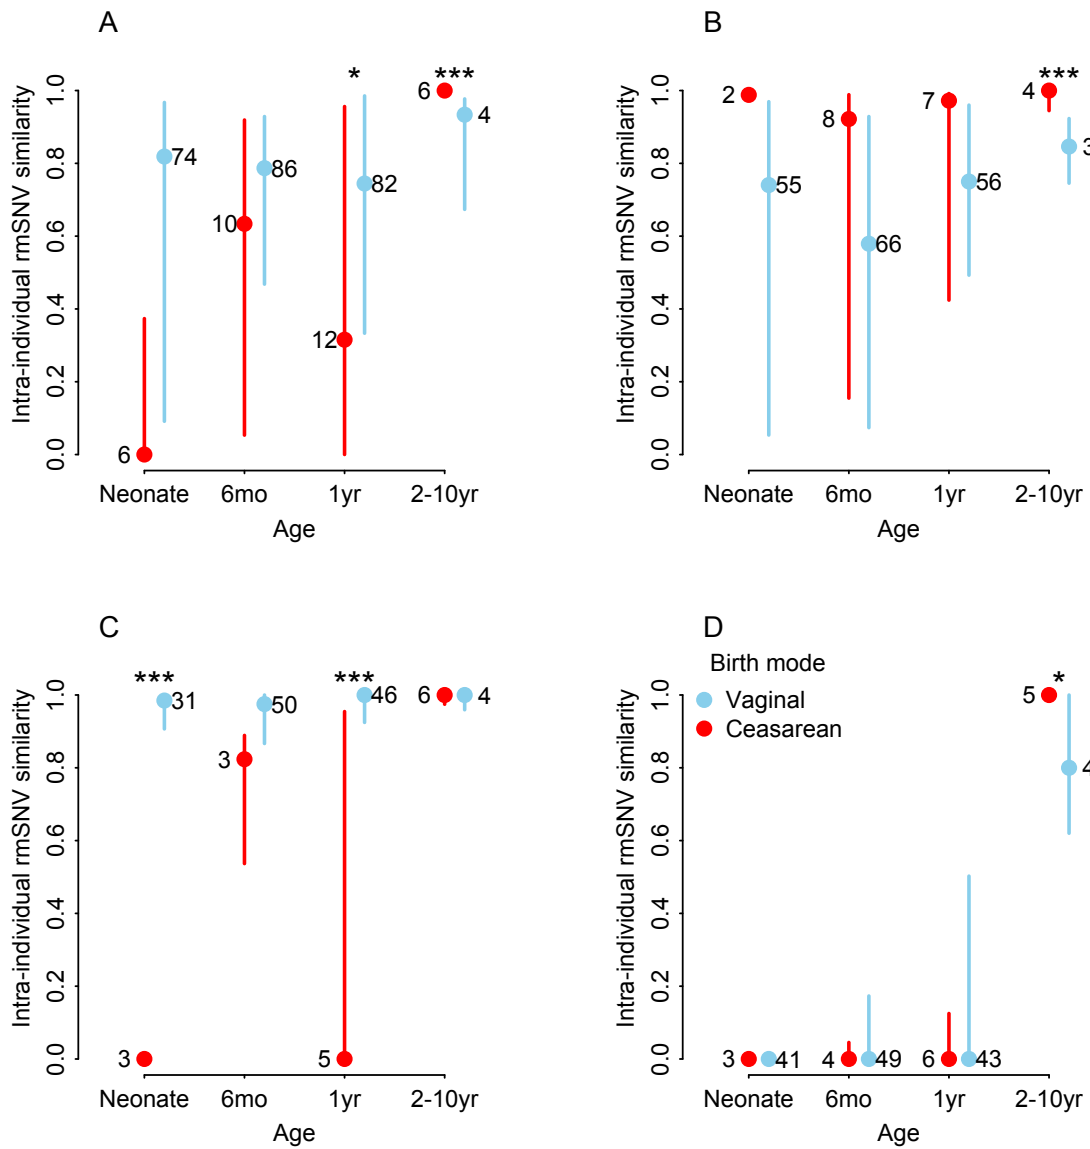

Supplemental Figure S7.

Intra-individual strain population stability (rmSNV profile similarity) at different ages by birth mode. The circles represent group medians, and the lines span the inter-quartile range. Significant differences between the birth modes are indicated with asterisks (beta regression; \*  $p < 0.05$ ; \*\*\*  $p < 0.001$ ). (A) All monitored species. (B) Actinobacteria. (C) Bacteroidia. (D) Clostridia.
