# Supplementary material for: Selective maternal seeding and environment shape the human gut microbiome
Source: PubMed Central journal article supplement (PMC5880245; doi:10.1101/gr.233940.117), 2018-04
Supplement: supp_gr.233940.117_Supplemental_Fig_S9.pdf [file supp_gr.233940.117_Supplemental_Fig_S9.pdf]

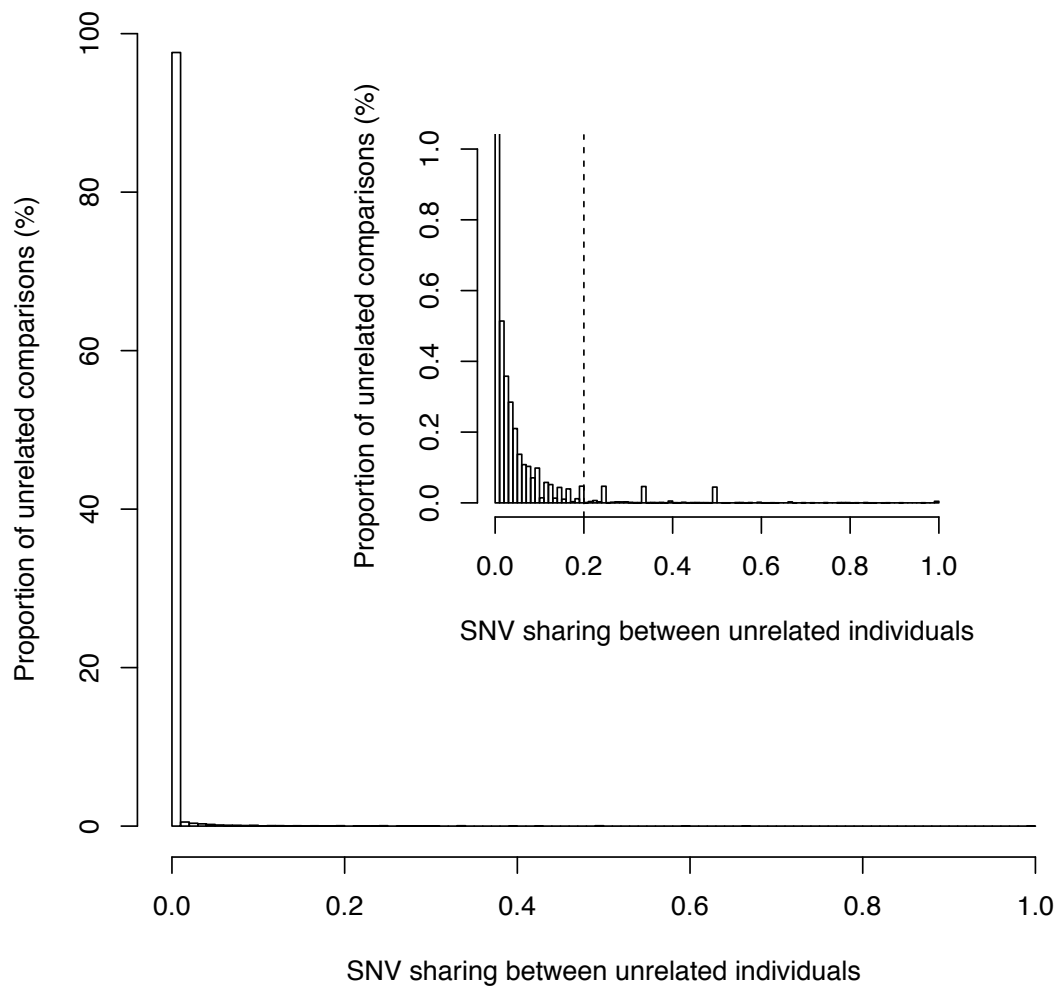

Supplemental Figure S8.

Histogram of rmSNV sharing between unrelated individuals. The small panel is a zoomed-in version of the larger panel. The dashed line denotes the cut-off used as evidence of strain sharing.
